# Supplementary material for: Integrative analysis of miRNA expression profiles reveals distinct and common molecular mechanisms underlying broad diagnostic groups of severe mental disorders
Source: Springer Nature journal article supplement (doi:10.1038/s41380-025-03018-9), 2025-04-22

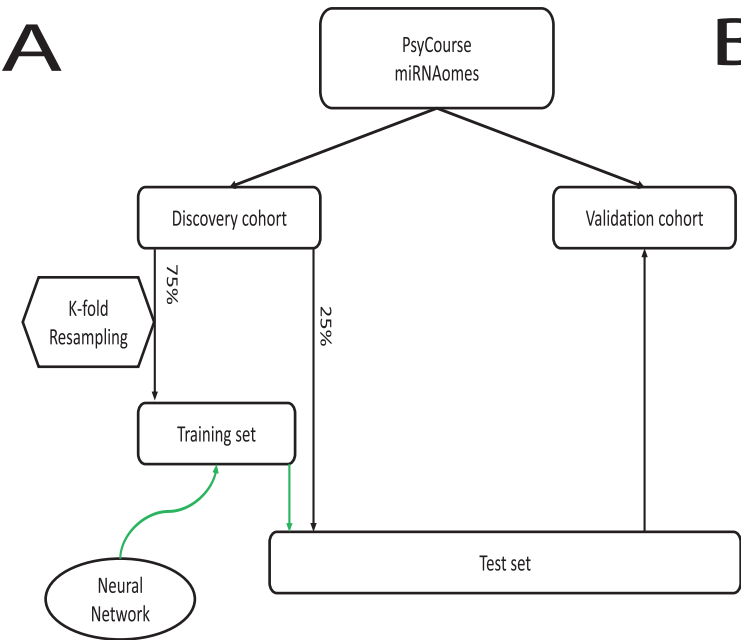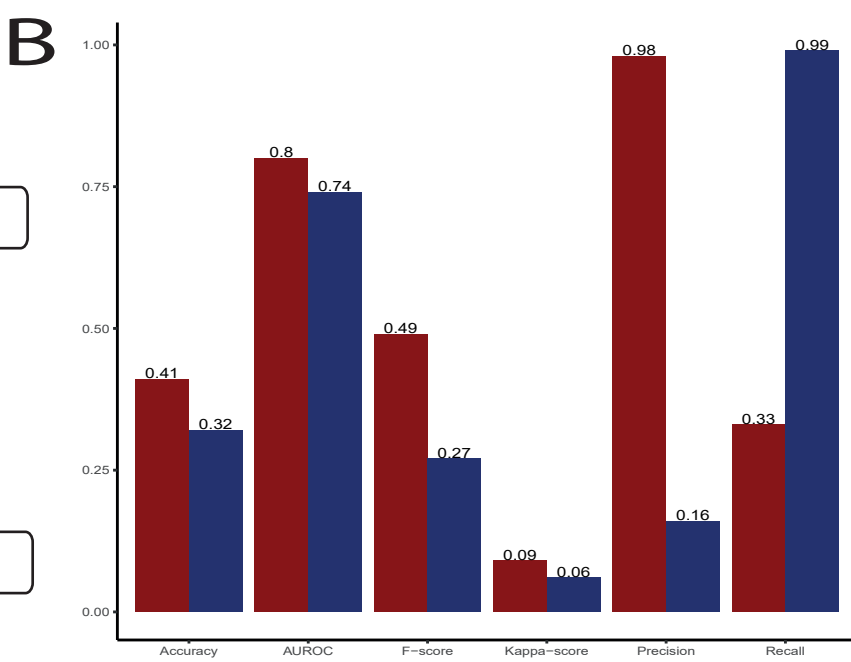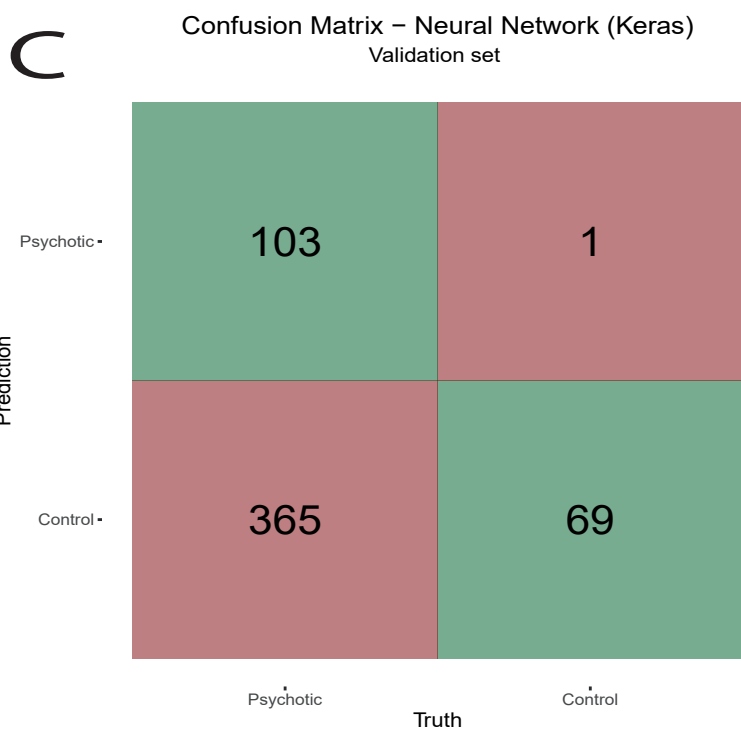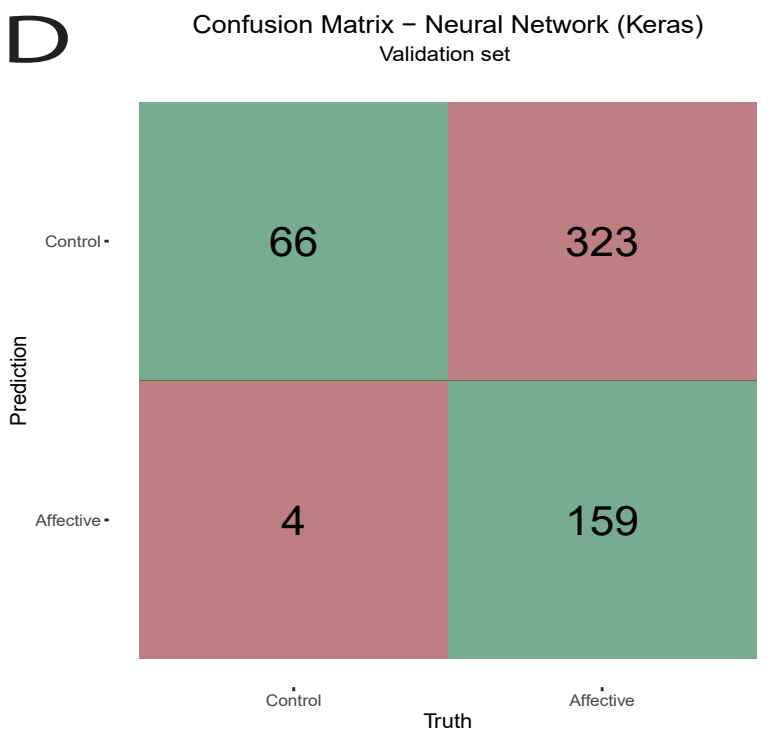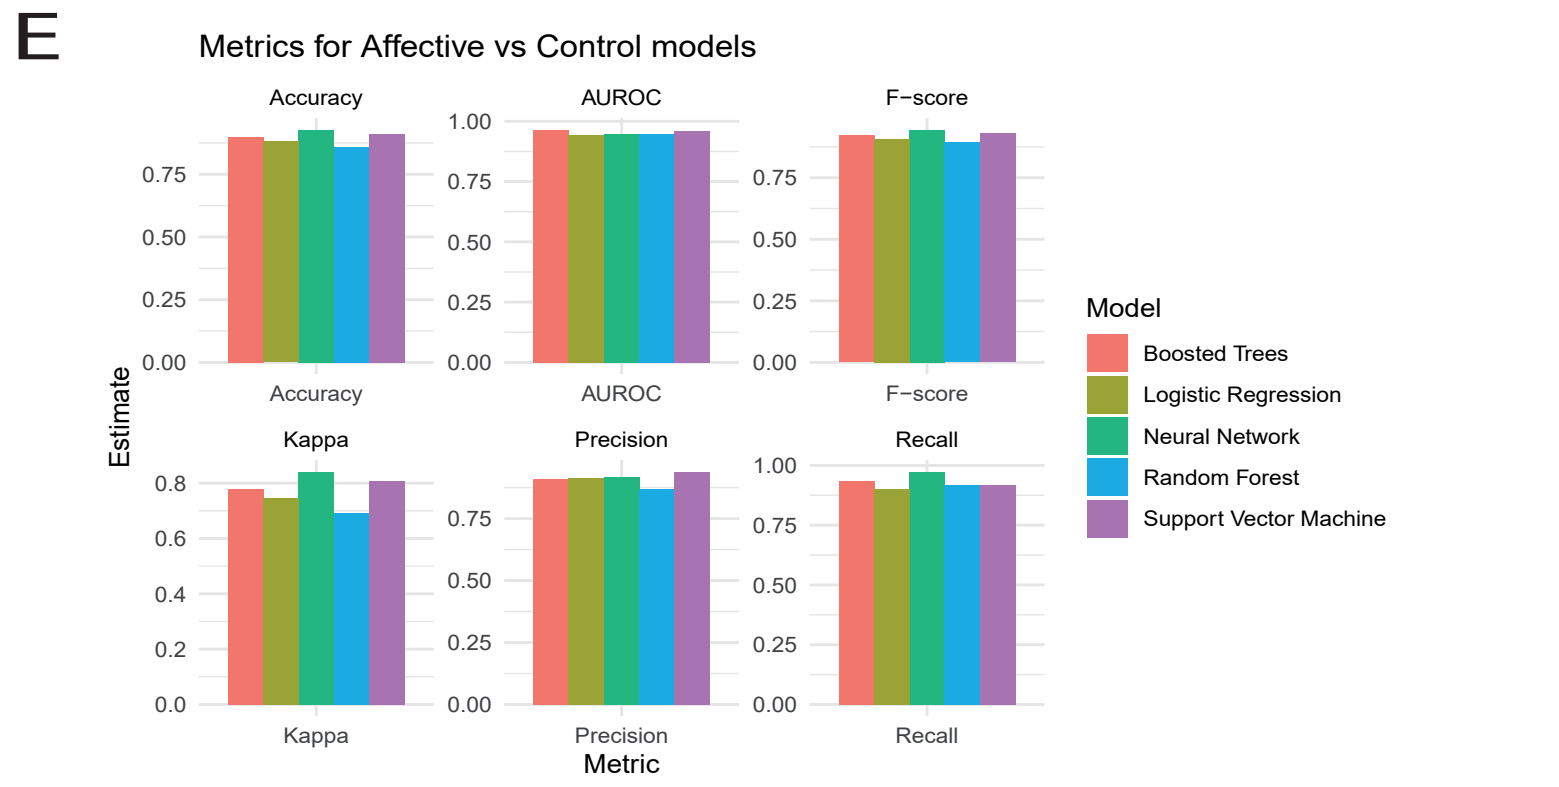

F

Metrics for Psychotic vs Control models

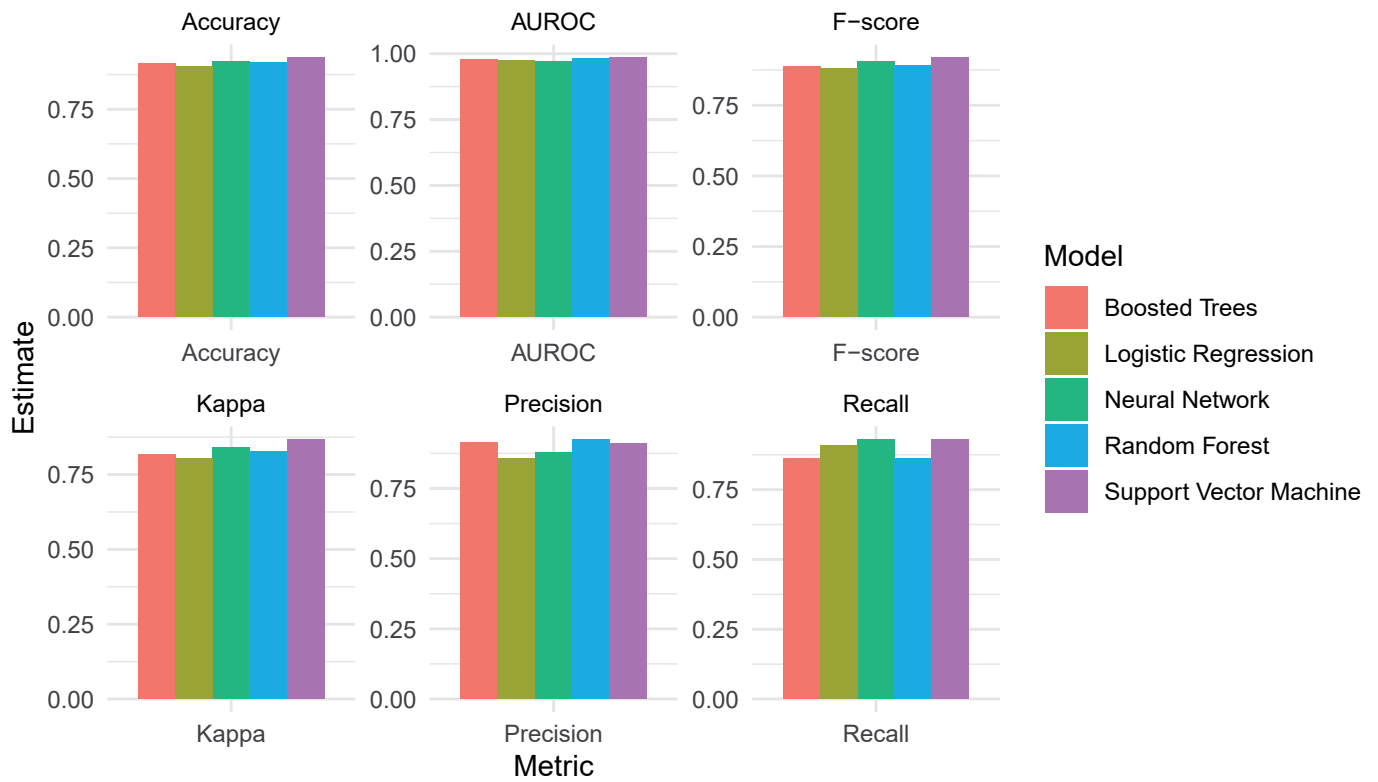

G

Residuals of the Affective vs Control models

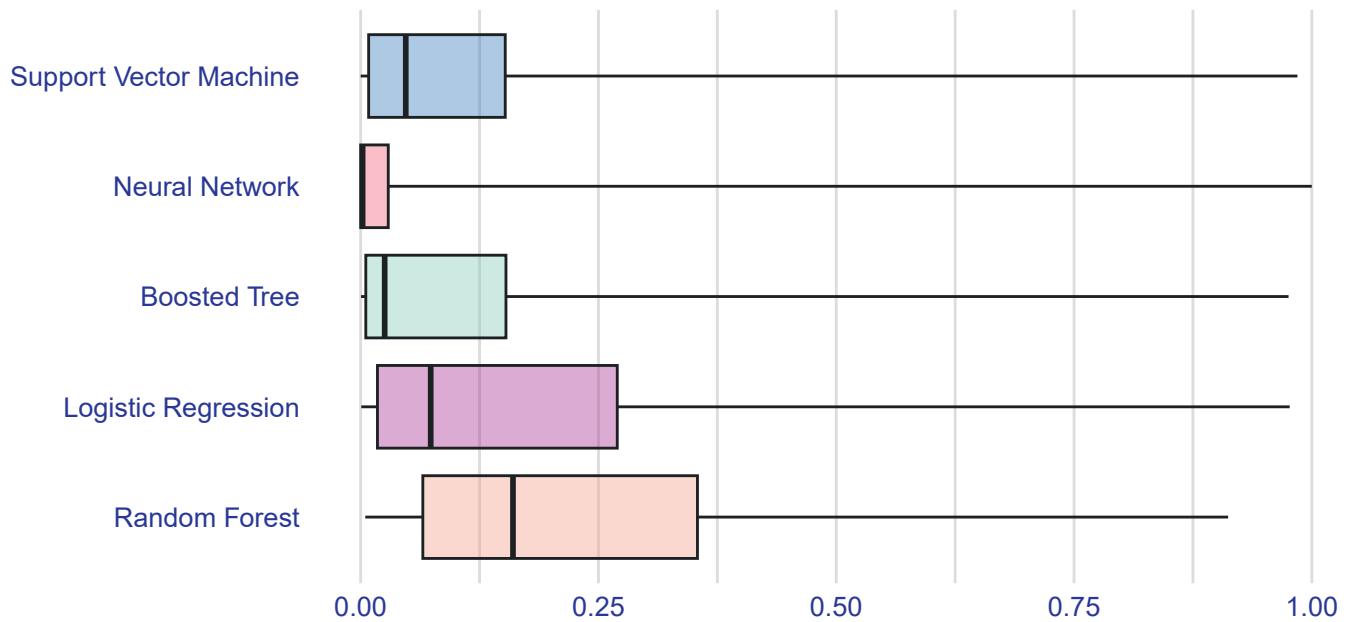

H

Residuals of the Psychotic vs Control models

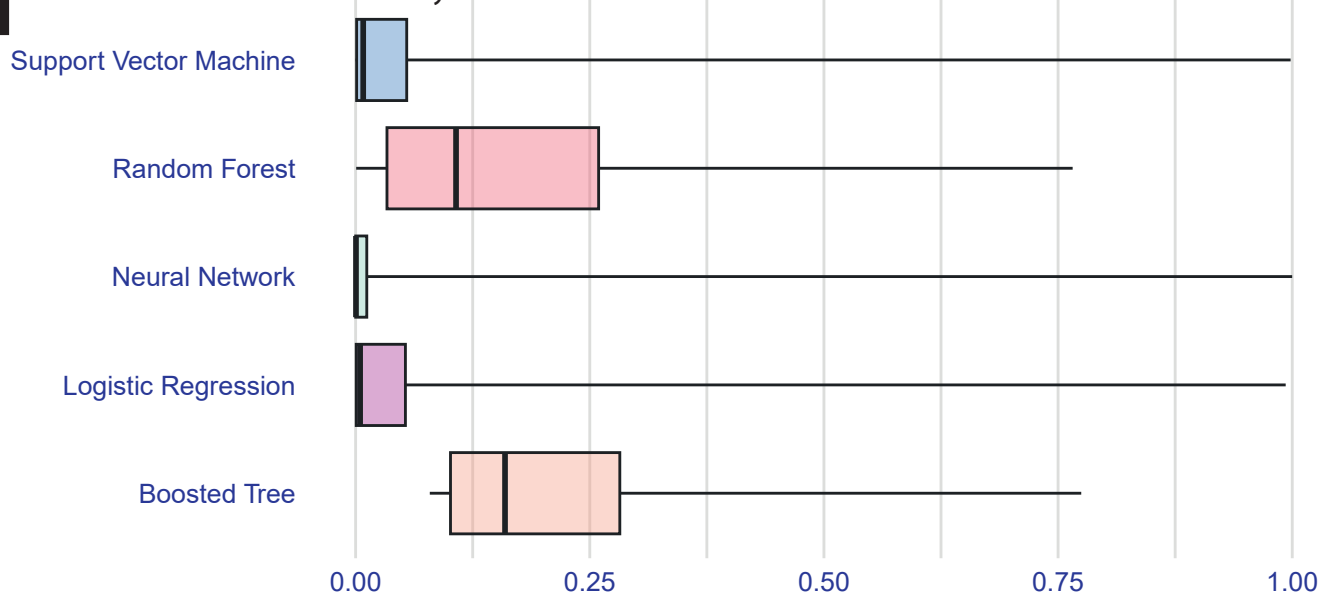

I

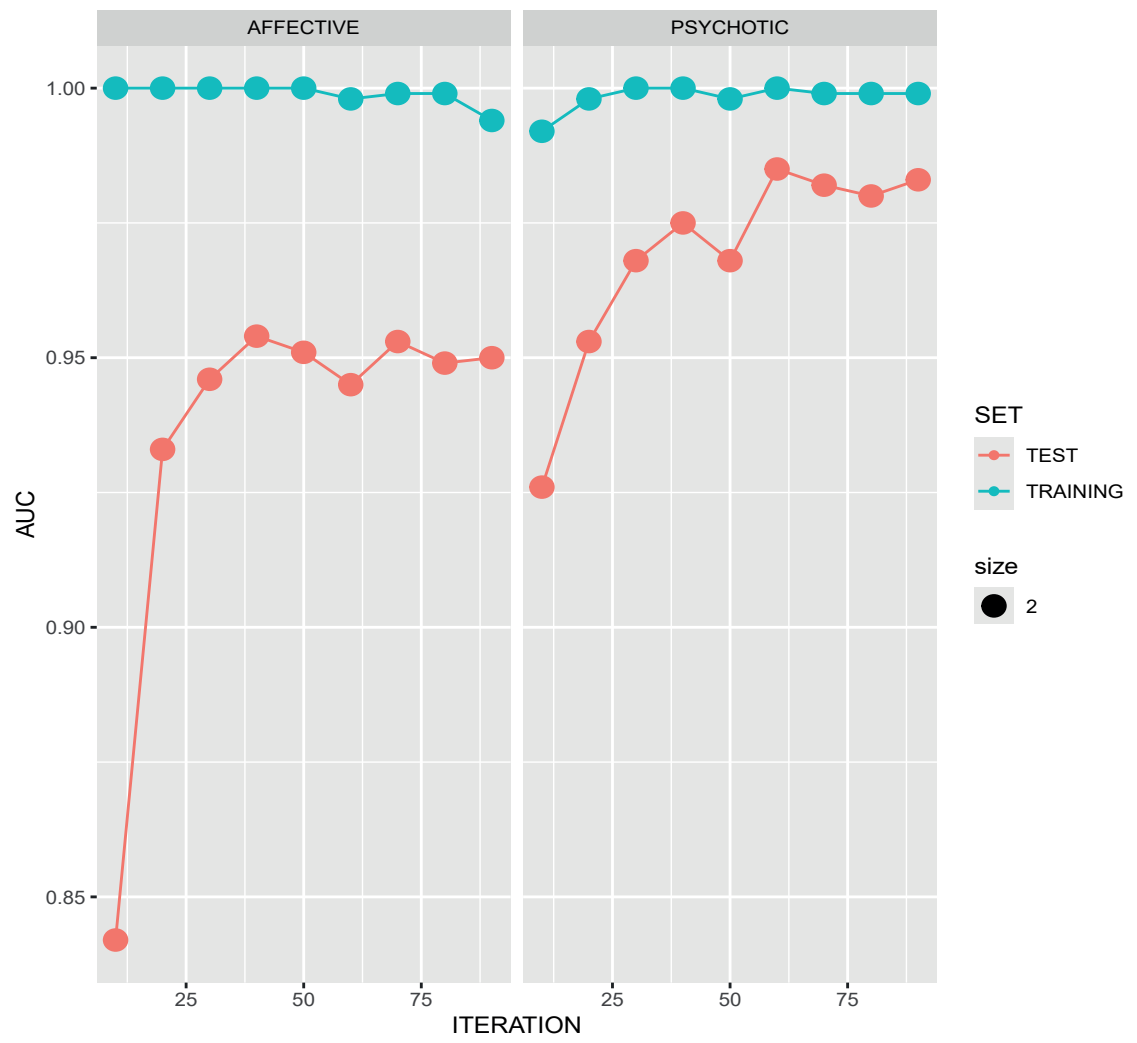

J

ROC Curve

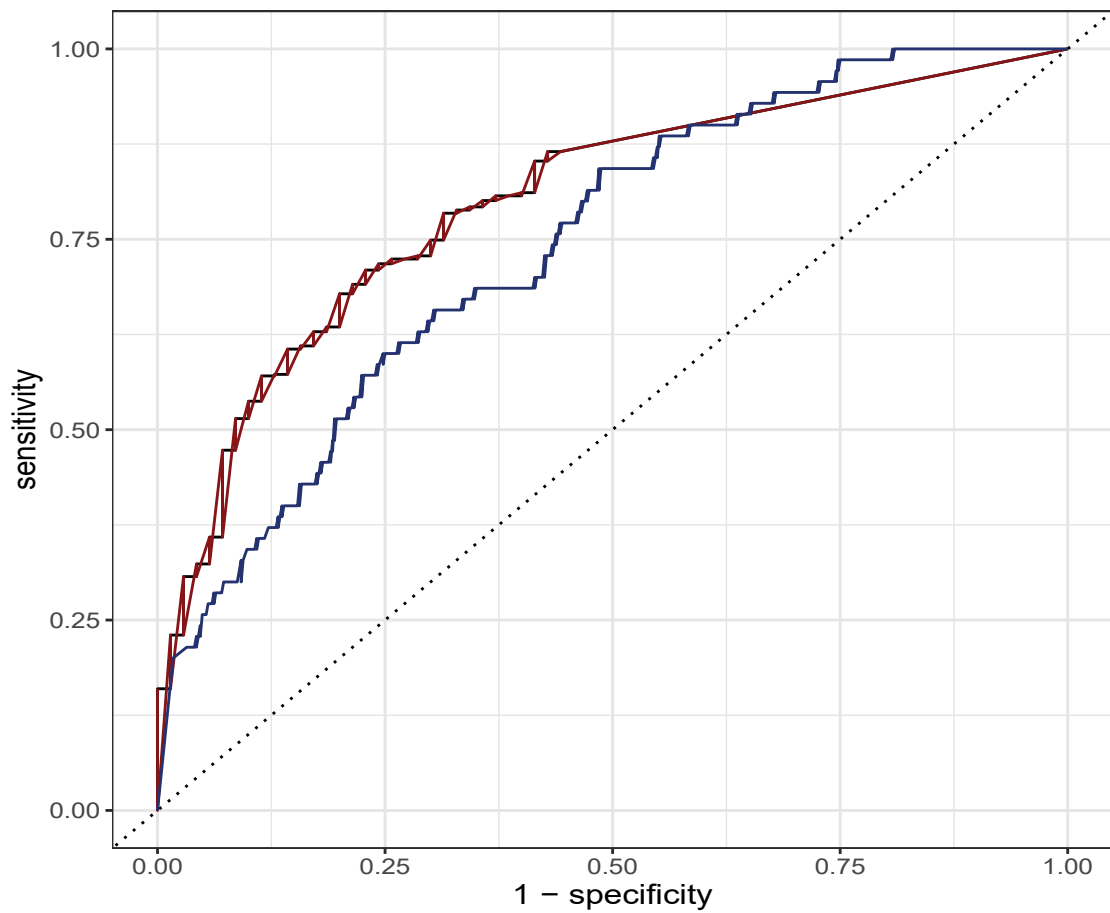

Supplement: MOESM4 [file 41380_2025_3018_MOESM4_ESM.pdf › 41380_2025_3018_MOESM4_ESM.pdf]
