# Supplementary material for: Integrative analysis of miRNA expression profiles reveals distinct and common molecular mechanisms underlying broad diagnostic groups of severe mental disorders
Source: Springer Nature journal article supplement (doi:10.1038/s41380-025-03018-9), 2025-04-22
Supplement: MOESM7 [file 41380_2025_3018_MOESM7_ESM.xlsx]

## Sheet: DESCRIPTION
Supplementary Table	Description
I	Summary of the DGE analysis results
II	Table that resume the miRNAs identified in previous studies
III	Table that indicate if the miRNA expressed in blood were identified in our DGE analysis and/or in previous studies of schizophrenia, bipolar disorders and major depressive disorder
IV	Table that indicate the number of miRNA for which the TWAS models were computed and cis-heritability summary
V	TWAS heritability of each miRNAs
VI	Allelic proportions of the TWAS eQTL across the 3 broad groups
VII	Table that resume the linkage disequilibrium (R² and D') between the TWAS eQTL and the GWAS eQTL
VIII	Results of our gene ontology analysis
IX	Summary of the miRSNPs of the identified target genes
X	Summary of the 10 genes that are targeted by the most miRNAs among those we identified

## Sheet: ST 1
Supplementary Table I	Summary of the DGE analysis results
Batch	Control	Condition	Expression effect (in condition)	Number of DGE	miRNA name
Discovery	Control	Psychotic	up	175	hsa-let-7a-3p_hsa-let-7a-1, hsa-let-7a-3p_hsa-let-7a-3, hsa-let-7b-3p_hsa-let-7b, hsa-let-7f-1-3p_hsa-let-7f-1, hsa-let-7g-5p_hsa-let-7g, hsa-let-7i-3p_hsa-let-7i, hsa-miR-101-3p_hsa-mir-101-1, hsa-miR-101-3p_hsa-mir-101-2, hsa-miR-103a-3p_hsa-mir-103a-1, hsa-miR-103a-3p_hsa-mir-103a-2, hsa-miR-106a-5p_hsa-mir-106a, hsa-miR-106b-5p_hsa-mir-106b, hsa-miR-107_hsa-mir-107, hsa-miR-122-5p_hsa-mir-122…
Discovery	Control	Psychotic	down	114	hsa-let-7b-5p_hsa-let-7b, hsa-let-7e-5p_hsa-let-7e, hsa-let-7i-5p_hsa-let-7i, hsa-miR-10399-3p_hsa-mir-10399, hsa-miR-106b-3p_hsa-mir-106b, hsa-miR-10a-5p_hsa-mir-10a, hsa-miR-10b-5p_hsa-mir-10b, hsa-miR-11401_hsa-mir-11401, hsa-miR-1178-3p_hsa-mir-1178, hsa-miR-1229-3p_hsa-mir-1229, hsa-miR-1238-3p_hsa-mir-1238, hsa-miR-1260a_hsa-mir-1260a, hsa-miR-1260b_hsa-mir-1260b, hsa-miR-127-3p_hsa-mir-127…
Discovery	Control	Affective	up	122	hsa-let-7a-3p_hsa-let-7a-1, hsa-let-7a-3p_hsa-let-7a-3, hsa-let-7f-1-3p_hsa-let-7f-1, hsa-miR-103a-3p_hsa-mir-103a-1, hsa-miR-103a-3p_hsa-mir-103a-2, hsa-miR-106a-5p_hsa-mir-106a, hsa-miR-106b-5p_hsa-mir-106b, hsa-miR-107_hsa-mir-107, hsa-miR-122-5p_hsa-mir-122, hsa-miR-125a-5p_hsa-mir-125a, hsa-miR-1271-5p_hsa-mir-1271, hsa-miR-1285-3p_hsa-mir-1285-1, hsa-miR-1285-3p_hsa-mir-1285-2, hsa-miR-130a…
Discovery	Control	Affective	down	61	hsa-let-7b-5p_hsa-let-7b, hsa-miR-10401-3p_hsa-mir-10401, hsa-miR-1229-3p_hsa-mir-1229, hsa-miR-1238-3p_hsa-mir-1238, hsa-miR-1260a_hsa-mir-1260a, hsa-miR-1260b_hsa-mir-1260b, hsa-miR-129-1-3p_hsa-mir-129-1, hsa-miR-1306-5p_hsa-mir-1306, hsa-miR-1306-3p_hsa-mir-1306, hsa-miR-155-5p_hsa-mir-155, hsa-miR-197-3p_hsa-mir-197, hsa-miR-210-5p_hsa-mir-210, hsa-miR-2110_hsa-mir-2110, hsa-miR-3124-5p_hsa-…
Discovery	Psychotic	Affective	up	39	hsa-miR-1178-3p_hsa-mir-1178, hsa-miR-1238-3p_hsa-mir-1238, hsa-miR-1270_hsa-mir-1270, hsa-miR-1304-3p_hsa-mir-1304, hsa-miR-148a-3p_hsa-mir-148a, hsa-miR-151a-3p_hsa-mir-151a, hsa-miR-1538_hsa-mir-1538, hsa-miR-3150a-5p_hsa-mir-3150a, hsa-miR-3158-3p_hsa-mir-3158-1, hsa-miR-3158-3p_hsa-mir-3158-2, hsa-miR-323a-3p_hsa-mir-323a, hsa-miR-4661-5p_hsa-mir-4661, hsa-miR-4664-3p_hsa-mir-4664, hsa-miR-4…
Discovery	Psychotic	Affective	down	48	hsa-miR-101-3p_hsa-mir-101-1, hsa-miR-101-3p_hsa-mir-101-2, hsa-miR-106b-5p_hsa-mir-106b, hsa-miR-126-5p_hsa-mir-126, hsa-miR-126-3p_hsa-mir-126, hsa-miR-1299_hsa-mir-1299, hsa-miR-140-5p_hsa-mir-140, hsa-miR-142-5p_hsa-mir-142, hsa-miR-142-3p_hsa-mir-142, hsa-miR-144-5p_hsa-mir-144, hsa-miR-144-3p_hsa-mir-144, hsa-miR-16-5p_hsa-mir-16-1, hsa-miR-16-5p_hsa-mir-16-2, hsa-miR-16-2-3p_hsa-mir-16-2, …
Validation	Control	Psychotic	up	197	hsa-let-7a-3p_hsa-let-7a-1, hsa-let-7a-3p_hsa-let-7a-3, hsa-let-7b-3p_hsa-let-7b, hsa-let-7f-1-3p_hsa-let-7f-1, hsa-let-7g-5p_hsa-let-7g, hsa-let-7i-3p_hsa-let-7i, hsa-miR-101-3p_hsa-mir-101-1, hsa-miR-101-3p_hsa-mir-101-2, hsa-miR-103a-3p_hsa-mir-103a-1, hsa-miR-103a-3p_hsa-mir-103a-2, hsa-miR-10401-3p_hsa-mir-10401, hsa-miR-106a-5p_hsa-mir-106a, hsa-miR-106b-5p_hsa-mir-106b, hsa-miR-107_hsa-mir…
Validation	Control	Psychotic	down	141	hsa-let-7a-5p_hsa-let-7a-1, hsa-let-7a-5p_hsa-let-7a-2, hsa-let-7a-5p_hsa-let-7a-3, hsa-let-7b-5p_hsa-let-7b, hsa-let-7d-3p_hsa-let-7d, hsa-let-7e-5p_hsa-let-7e, hsa-let-7i-5p_hsa-let-7i, hsa-miR-10399-3p_hsa-mir-10399, hsa-miR-10527-5p_hsa-mir-10527, hsa-miR-106b-3p_hsa-mir-106b, hsa-miR-10a-5p_hsa-mir-10a, hsa-miR-10b-5p_hsa-mir-10b, hsa-miR-11401_hsa-mir-11401, hsa-miR-1178-3p_hsa-mir-1178, hs…
Validation	Control	Affective	up	189	hsa-let-7a-3p_hsa-let-7a-1, hsa-let-7a-3p_hsa-let-7a-3, hsa-let-7f-1-3p_hsa-let-7f-1, hsa-let-7g-5p_hsa-let-7g, hsa-let-7i-3p_hsa-let-7i, hsa-miR-101-3p_hsa-mir-101-1, hsa-miR-101-3p_hsa-mir-101-2, hsa-miR-103a-3p_hsa-mir-103a-1, hsa-miR-103a-3p_hsa-mir-103a-2, hsa-miR-10401-3p_hsa-mir-10401, hsa-miR-106a-5p_hsa-mir-106a, hsa-miR-106b-5p_hsa-mir-106b, hsa-miR-107_hsa-mir-107, hsa-miR-125b-5p_hsa-…
Validation	Control	Affective	down	159	hsa-let-7a-5p_hsa-let-7a-1, hsa-let-7a-5p_hsa-let-7a-2, hsa-let-7a-5p_hsa-let-7a-3, hsa-let-7b-5p_hsa-let-7b, hsa-let-7d-3p_hsa-let-7d, hsa-let-7e-5p_hsa-let-7e, hsa-let-7f-5p_hsa-let-7f-1, hsa-let-7f-5p_hsa-let-7f-2, hsa-let-7i-5p_hsa-let-7i, hsa-miR-10399-3p_hsa-mir-10399, hsa-miR-10527-5p_hsa-mir-10527, hsa-miR-106b-3p_hsa-mir-106b, hsa-miR-10a-5p_hsa-mir-10a, hsa-miR-10b-5p_hsa-mir-10b, hsa-m…
Validation	Psychotic	Affective	up	23	hsa-let-7b-5p_hsa-let-7b, hsa-miR-1180-3p_hsa-mir-1180, hsa-miR-1287-5p_hsa-mir-1287, hsa-miR-1294_hsa-mir-1294, hsa-miR-1307-3p_hsa-mir-1307, hsa-miR-132-5p_hsa-mir-132, hsa-miR-1908-5p_hsa-mir-1908, hsa-miR-191-3p_hsa-mir-191, hsa-miR-193a-5p_hsa-mir-193a, hsa-miR-3127-3p_hsa-mir-3127, hsa-miR-3200-3p_hsa-mir-3200, hsa-miR-331-5p_hsa-mir-331, hsa-miR-378g_hsa-mir-378g, hsa-miR-584-5p_hsa-mir-58…
Validation	Psychotic	Affective	down	64	hsa-let-7a-3p_hsa-let-7a-1, hsa-let-7a-3p_hsa-let-7a-3, hsa-let-7b-3p_hsa-let-7b, hsa-let-7f-1-3p_hsa-let-7f-1, hsa-miR-1260b_hsa-mir-1260b, hsa-miR-1273h-3p_hsa-mir-1273h, hsa-miR-1284_hsa-mir-1284, hsa-miR-142-5p_hsa-mir-142, hsa-miR-143-3p_hsa-mir-143, hsa-miR-145-5p_hsa-mir-145, hsa-miR-148b-3p_hsa-mir-148b, hsa-miR-150-5p_hsa-mir-150, hsa-miR-155-5p_hsa-mir-155, hsa-miR-186-5p_hsa-mir-186, h…

## Sheet: ST 2
Supplementary Table II
Original article	Review	Tissue	Direction	Species	miRNA	Disorder
Hansen et al. (2007)	10.1016/j.nbd.2011.12.029	Postmortem brain		Human	miR-198, miR-206	SCHIZOPHRENIA
Perkins et al. (2007)	10.1016/j.nbd.2011.12.029	Postmortem brain	Up-regulated	Human	miR-106b, miR-7	SCHIZOPHRENIA
	10.1016/j.nbd.2011.12.029		Down-regulated		miR-26b, miR-30b, miR-29b, miR-195, miR-92, miR-30a, miR-30d, miR-20b, miR-29c, miR-29a, miR-212, miR-24, miR-30e, miR-9*	SCHIZOPHRENIA
Beveridge et al. (2008)	10.1016/j.nbd.2011.12.029	Postmortem brain		Human	miR-181b	SCHIZOPHRENIA
Stark et al. (2008)	10.1016/j.nbd.2011.12.029	Postmortem brain 22q11.2 hemizygous deletion	Down-regulated	Mouse	miR-106b, miR-134, miR-140*, miR-151, miR-18, miR-185, miR-194, miR-194, miR-212, miR-224, miR-323, miR-325, miR-362, miR-383, miR-409, miR-422b, miR-491, miR-494, miR-532, miR-540, miR-669a, miR-673, miR-674, miR-674*, miR-708, miR-93,	SCHIZOPHRENIA
Beveridge et al. (2010)	10.1016/j.nbd.2011.12.029	Postmortem brain [STG (BA22) region]	Up-regulated	Human	let-7e, miR-107, miR-125b, miR-128a, miR-128b, miR-129, miR-130a, miR-133b, miR-138, miR-146b, miR-148a, miR-150, miR-152, miR-155, miR-15a, miR-15b, miR-16, miR-17-3p, miR-17-5p, miR-181b, miR-195, miR-197, miR-199a*, miR-19a, miR-20a, miR-222, miR-23a, miR-24, miR-26b, miR-26b, miR-27b, miR-28, miR-296, miR-328, miR-330, miR-335, miR-338, miR-339, miR-340, miR-373*, miR-381, miR-409-5p, miR-432…	SCHIZOPHRENIA
Beveridge et al. (2010)	10.1016/j.nbd.2011.12.029	Postmortem brain [DLPFC (BA9) region]	Up-regulated	Human	let-7d, miR-101, miR-105, miR-107, miR-126*, miR-128a, miR-153, miR-15a, miR-15b, miR-16, miR-16, miR-181a, miR-181b, miR-181b, miR-181d, miR-184, miR-195, miR-199a, miR-20a, miR-219, miR-223, miR-26b, miR-27a, miR-29c, miR-302a*, miR-302b*, miR-31, miR-33, miR-338, miR-409-3p, miR-512-3p, miR-519b, miR-7	SCHIZOPHRENIA
Feng et al. (2009)	10.1016/j.nbd.2011.12.029	single nucleotide polymorphism within a microRNA		Human	let-7f-2, miR-188-3p, pre-miR-18b, miR-325-3p, pre-miR-502, pre-miR-505, miR-509-3p, miR-510-3p, miR-660	SCHIZOPHRENIA
Kocerha et al. (2009)	10.1016/j.nbd.2011.12.029	Pharmacological		Mouse	miR-219	SCHIZOPHRENIA
Mellios et al. (2009)	10.1016/j.nbd.2011.12.029	Postmortem brain	Down-regulated	Human	miR-30e, miR-195	SCHIZOPHRENIA
Sun et al. (2009)	10.1016/j.nbd.2011.12.029	miR-SNP		Human	miR-502, miR-510	SCHIZOPHRENIA
Tabares-Seisdedos et al. (2009)	10.1016/j.nbd.2011.12.029	CNV		Human	miR-124-1, miR-320, miR-383, miR-486, miR-596, miR-597, miR-598,	SCHIZOPHRENIA
Zhu et al. (2009)	10.1016/j.nbd.2011.12.029	Postmortem brain		Human	miR-346	SCHIZOPHRENIA
Kim et al. (2010)	10.1016/j.nbd.2011.12.029	Postmortem brain	Up-regulated	Human	miR-132, miR-132*, miR-154*, miR-212, miR-34a, miR-544, miR-7	SCHIZOPHRENIA
Mellios et al. (2010)	10.1016/j.nbd.2011.12.029	Postmortem brain	Down-regulated	Human	miR-30b	SCHIZOPHRENIA
Xu et al. (2010)	10.1016/j.nbd.2011.12.029	miR-SNP		Human	miR-24, pre-miR-30e, miR-30e	SCHIZOPHRENIA
Gardiner et al. (2011)	10.1016/j.nbd.2011.12.029	Peripheral tissue (PBMC)	Down-regulated	Human	miR-107, miR-1275, miR-128, miR-130b*, miR-134, miR-148b, miR-150*, miR-151-3p, miR-16-2*, miR-181a, miR-200c, miR-224, miR-28-3p, miR-28-5p, miR-29b-1*, miR-30e*, miR-31, miR-329, miR-335*, miR-342-5p, miR-409-3p, miR-431, miR-432, miR-486-3p, miR-487b, miR-544, miR-574-3p, miR-576-5p, miR-584, miR-625*, miR-664, miR-877, miR-99b,	SCHIZOPHRENIA
Lai et al. (2011)	10.1016/j.nbd.2011.12.029	Peripheral tissue (PBMC)	Up-regulated	Human	miR-34a, miR-449a, miR-548d, miR-564, miR-572, miR-652,	SCHIZOPHRENIA
	10.1016/j.nbd.2011.12.029		Down-regulated		miR-432	SCHIZOPHRENIA
Moreau et al. (2011)	10.1016/j.nbd.2011.12.029	Postmortem brain [DLPFC (BA9) region]	Up-regulated	Human	miR-148b, miR-151 miR-27b, miR-301, miR-545, miR-639 miR-106b, miR-138, miR-193b, miR-210, miR-22, miR-324-3p, miR-338, miR-339, miR-425	SCHIZOPHRENIA
Santarelli et al. (2011)	10.1016/j.nbd.2011.12.029	Postmortem brain [DLPFC (BA46) region]	Up-regulated	Human	miR-105, miR-134, miR-148b, miR-150, miR-152, miR-154, miR-17-5p, miR-187, miR-193a, miR-199a*, miR-199b, miR-222, miR-25, miR-328, miR-382, miR-409-3p, miR-423, miR-425-5p, miR-433, miR-452*, miR-487a, miR-495, miR-502, miR-512-3p, miR-519c, miR-532, miR-542-3p, miR-548b, miR-590, miR-592, miR-652, miR-767-5p, miR-92b,	SCHIZOPHRENIA
The Schizophrenia Psychiatric Genome-Wide Association Study GWAS Consortium (2011)	10.1016/j.nbd.2011.12.029	GWAS		Human	miR-137	SCHIZOPHRENIA
Heidbreder C A, Groenewegen H J. The medial prefrontal cortex in the rat: evidence for a dorso-ventral distinction based upon functional and anatomical characteristics[J]. Neurosci Biobehav Rev, 2003, 27(6):555-579.	https://doi.org/10.56028/aetr.1.2.497	Postmortem brain	Down-regulated		miR-142-5p, miR-137, miR-489, miR-148b, miR-101, miR-324-5p, miR-301a, miR-146a, miR-335, miR-494, miR-20b, miR-376a, miR-190, miR-155, miR-660, miR-130a, miR-27a, miR-497, miR-10a, miR-20a, miR-142-3p	MAJOR DEPRESSION
Huang C, Wang Y, Wu Z, et al. miR-98-5p plays a critical role in depression and antidepressant effect of ketamine[J]. Transl Psychiatry, 2021,11(1):454.	https://doi.org/10.56028/aetr.1.2.497	Postmortem brain	Down-regulated		miR-218-5p	MAJOR DEPRESSION
Smalheiser N R, Lugli G, Rizavi H S, et al. MicroRNA expression is down-regulated and reorganized in the prefrontal cortex of depressed suicide subjects[J]. PLoS One, 2012,7(3):e33201.	https://doi.org/10.56028/aetr.1.2.497	Postmortem brain	Up-regulated		miR-215-5p, miR-192-5p, miR-202-5p, miR-19b-3p, miR-423-5p, miR-219a-2-3p	MAJOR DEPRESSION
Smalheiser N R, Lugli G, Rizavi H S, et al. MicroRNA expression is down-regulated and reorganized in the prefrontal cortex of depressed suicide subjects[J]. PLoS One, 2012,7(3):e33201.	https://doi.org/10.56028/aetr.1.2.497	Postmortem brain	Down-regulated		miR-511-5p, miR-483-5p	MAJOR DEPRESSION
Yoshino Y, Roy B, Dwivedi Y. Differential and unique patterns of synaptic miRNA expression in dorsolateral prefrontal cortex of depressed subjects[J]. Neuropsychopharmacology, 2021,46(5):900-910	https://doi.org/10.56028/aetr.1.2.497	Postmortem brain	Up-regulated		miR-30e, miR-30a	MAJOR DEPRESSION
Yoshino Y, Roy B, Dwivedi Y. Differential and unique patterns of synaptic miRNA expression in dorsolateral prefrontal cortex of depressed subjects[J]. Neuropsychopharmacology, 2021,46(5):900-910	https://doi.org/10.56028/aetr.1.2.497	Postmortem brain	Down-regulated		miR-200a	MAJOR DEPRESSION
						MAJOR DEPRESSION
Roy, B.; Dunbar, M.; Agrawal, J.; Allen, L.; Dwivedi, Y. Amygdala-Based Altered MiRNome and Epigenetic Contribution of MiR-128-3p in Conferring Susceptibility to Depression-Like Behavior via Wnt Signaling. Int. J. Neuropsychopharmacol. 2020, 23, 165–177.	https://doi.org/10.3390/ijms222111312	Postmortem brain	Up-regulated		miR-128-3p	MAJOR DEPRESSION
Fiori, L.M.; Kos, A.; Lin, R.; Théroux, J.-F.; Lopez, J.P.; Kühne, C.; Eggert, C.; Holzapfel, M.; Huettl, R.-E.; Mechawar, N.; et al. MiR-323a Regulates ERBB4 and Is Involved in Depression. Mol. Psychiatry 2020.	https://doi.org/10.3390/ijms222111312	Postmortem brain	Up-regulated		miR-320b-3p, miR-331-3p, miR-323a-3p, miR-204-5p, miR-331-3p	MAJOR DEPRESSION
Wingo, T.S.; Yang, J.; Fan, W.; Min Canon, S.; Gerasimov, E.S.; Lori, A.; Logsdon, B.; Yao, B.; Seyfried, N.T.; Lah, J.J.; et al. Brain MicroRNAs Associated with Late-Life Depressive Symptoms Are Also Associated with Cognitive Trajectory and Dementia. Npj Genomic Med. 2020, 5, 6.	https://doi.org/10.3390/ijms222111312	Postmortem brain	Down-regulated		miR-484-5p, miR-26b-5p, miR-30d-5p, miR-197-3p	MAJOR DEPRESSION
He, C.; Bai, Y.; Wang, Z.; Fan, D.; Wang, Q.; Liu, X.; Zhang, H.; Zhang, H.; Zhang, Z.; Yao, H.; et al. Identification of MicroRNA-9 Linking the Effects of Childhood Maltreatment on Depression Using Amygdala Connectivity. NeuroImage 2021, 224, 117428	https://doi.org/10.3390/ijms222111312	Whole Blood	Up-regulated		miR-9-5p	MAJOR DEPRESSION
Sun, N.; Yang, C.; He, X.; Liu, Z.; Liu, S.; Li, X.; Wang, Y.; Jin, R.; Zhang, K. Impact of Expression and Genetic Variation of MicroRNA-34b/c on Cognitive Dysfunction in Patients with Major Depressive Disorder. Neuropsychiatr. Dis. Treat. 2020, 16, 1543–1554	https://doi.org/10.3390/ijms222111312	Correlation with worsening of cognitive functions for patients with MD	Positive correlation		miR-34b-5p, miR-34c-5p	MAJOR DEPRESSION
Zhao, L.; Yang, X.; Cui, L.; Wei, J.; Ni, P.; Li, M.; Wang, Y.; He, Y.; Li, X.; Liang, S.; et al. Increased Expression of a Novel MiRNA	https://doi.org/10.3390/ijms222111312	Whole Blood	Down-regulated		miR-1275	MAJOR DEPRESSION
in Peripheral Blood Is Negatively Correlated with Hippocampal Volume in Patients with Major Depressive Disorder. J. Affect. Disord. 2019, 245, 205–212.	https://doi.org/10.3390/ijms222111312	Whole Blood	Down-regulated		miR-184	MAJOR DEPRESSION
ung, Y.-Y.; Wu, M.-K.; Tsai, M.-C.; Huang, Y.-L.; Kang, H.-Y. Aberrant Expression of Intracellular Let-7e, MiR-146a, and MiR-155 Correlates with Severity of Depression in Patients with Major Depressive Disorder and Is Ameliorated after Antidepressant Treatment. Cells 2019, 8, 647.	https://doi.org/10.3390/ijms222111312	Whole Blood	Down-regulated		let-7e-5p, miR-21-5p, miR-146a, miR-155, miR-146a, miR-155	MAJOR DEPRESSION
Qi, S.; Yang, X.; Zhao, L.; Calhoun, V.D.; Perrone-Bizzozero, N.; Liu, S.; Jiang, R.; Jiang, T.; Sui, J.; Ma, X. MicroRNA132 Associated Multimodal Neuroimaging Patterns in Unmedicated Major Depressive Disorder. Brain 2018, 141, 916–926.	https://doi.org/10.3390/ijms222111312	Whole Blood	Up-regulated		miR-132-3p	MAJOR DEPRESSION
Wang, X.; Wang, B.; Zhao, J.; Liu, C.; Qu, X.; Li, Y. MiR-155 Is Involved in Major Depression Disorder and Antidepressant Treatment via Targeting SIRT1. Biosci. Rep. 2018, 38, BSR20181139	https://doi.org/10.3390/ijms222111312	Whole Blood	Up-regulated		miR-132-3p, miR-135b, miR-181b	MAJOR DEPRESSION
	https://doi.org/10.3390/ijms222111312	Whole Blood	Up-regulated		miR-155	MAJOR DEPRESSION
Wang, Q.; Roy, B.; Turecki, G.; Shelton, R.C.; Dwivedi, Y. Role of Complex Epigenetic Switching in Tumor Necrosis Factor-α Upregulation in the Prefrontal Cortex of Suicide Subjects. Am. J. Psychiatry 2018, 175, 262–274.	https://doi.org/10.3390/ijms222111312	Whole Blood	Up-regulated		miR-19a-3p	MAJOR DEPRESSION
Lopez, J.P.; Pereira, F.; Richard-Devantoy, S.; Berlim, M.; Chachamovich, E.; Fiori, L.M.; Niola, P.; Turecki, G.; Jollant, F. Co-Variation of Peripheral Levels of MiR-1202 and Brain Activity and Connectivity During Antidepressant Treatment. Neuropsy-chopharmacology 2017, 42, 2043–2051	https://doi.org/10.3390/ijms222111312	Whole Blood	Down-regulated		miR-1202	MAJOR DEPRESSION
Volk, N.; Pape, J.C.; Engel, M.; Zannas, A.S.; Cattane, N.; Cattaneo, A.; Binder, E.B.; Chen, A. Amygdalar MicroRNA-15a Is Essential for Coping with Chronic Stress. Cell Rep. 2016, 17, 1882–1891.	https://doi.org/10.3390/ijms222111312	Whole Blood	Up-regulated		miR-15a-5p	MAJOR DEPRESSION
Sun, N.; Lei, L.; Wang, Y.; Yang, C.; Liu, Z.; Li, X.; Zhang, K. Preliminary Comparison of Plasma Notch-Associated MicroRNA-34b and -34c Levels in Drug Naive, First Episode Depressed Patients and Healthy Controls. J. Affect. Disord. 2016, 194, 109–114.	https://doi.org/10.3390/ijms222111312	PBMC	Up-regulated		miR-34b-5p, miR-34c-5p	MAJOR DEPRESSION
Maffioletti, E.; Cattaneo, A.; Rosso, G.; Maina, G.; Maj, C.; Gennarelli, M.; Tardito, D.; Bocchio-Chiavetto, L. Peripheral Whole Blood MicroRNA Alterations in Major Depression and Bipolar Disorder. J. Affect. Disord. 2016, 200, 250–258.	https://doi.org/10.3390/ijms222111312	Whole Blood	Up-regulated		miR-199a-5p, miR-345-5p, miR-330-3p, miR-425-3p, miR-24-3p, miR-29c-5p	MAJOR DEPRESSION
	https://doi.org/10.3390/ijms222111312	Whole Blood	Down-regulated		let-7a-5p, let-7f-5p, let-7d-5p, miR-1915-3p	MAJOR DEPRESSION
He, S.; Liu, X.; Jiang, K.; Peng, D.; Hong, W.; Fang, Y.; Qian, Y.; Yu, S.; Li, H. Alterations of MicroRNA-124 Expression in Peripheral Blood Mononuclear Cells in Pre- and Post-Treatment Patients with Major Depressive Disorder. J. Psychiatr. Res. 2016, 78, 65–71.	https://doi.org/10.3390/ijms222111312	PBMC	Up-regulated		miR-124-3p	MAJOR DEPRESSION
Gururajan, A.; Naughton, M.E.; Scott, K.A.; O’Connor, R.M.; Moloney, G.; Clarke, G.; Dowling, J.; Walsh, A.; Ismail, F.; Shorten, G.; et al. MicroRNAs as Biomarkers for Major Depression: A Role for Let-7b and Let-7c. Transl. Psychiatry 2016, 6, e862.	https://doi.org/10.3390/ijms222111312	Whole Blood	Down-regulated		let-7b, let-7c	MAJOR DEPRESSION
Vaisvaser, S.; Modai, S.; Farberov, L.; Lin, T.; Sharon, H.; Gilam, A.; Volk, N.; Admon, R.; Edry, L.; Fruchter, E.; et al. Neuro-Epigenetic Indications of Acute Stress Response in Humans: The Case of MicroRNA-29c. PLoS ONE 2016, 11, e0146236.	https://doi.org/10.3390/ijms222111312	PBMC	Up-regulated		miR-29c	MAJOR DEPRESSION
Liu, Y.; Yang, X.; Zhao, L.; Zhang, J.; Li, T.; Ma, X. Increased MiR-132 Level Is Associated with Visual Memory Dysfunction in Patients with Depression. Neuropsychiatr. Dis. Treat. 2016, 12, 2905–2911.	https://doi.org/10.3390/ijms222111312	Whole Blood	Down-regulated		miR-132-3p	MAJOR DEPRESSION
Su, M.; Hong, J.; Zhao, Y.; Liu, S.; Xue, X. MeCP2 Controls Hippocampal Brain-Derived Neurotrophic Factor Expression via Homeostatic Interactions with MicroRNA-132 in Rats with Depression. Mol. Med. Rep. 2015, 12, 5399–5406.	https://doi.org/10.3390/ijms222111312	Whole Blood	Up-regulated		miR-132	MAJOR DEPRESSION
Li, J.; Meng, H.; Cao, W.; Qiu, T. MiR-335 Is Involved in Major Depression Disorder and Antidepressant Treatment through Targeting GRM4. Neurosci. Lett. 2015, 606, 167–172	https://doi.org/10.3390/ijms222111312	Whole Blood	Down-regulated		miR-335, miR-583, miR-650, miR-708, miR-654	MAJOR DEPRESSION
	https://doi.org/10.3390/ijms222111312	Whole Blood	Up-regulated		miR-644, miR-450b, miR-328, miR-182	MAJOR DEPRESSION
Fan, H.; Sun, X.; Guo, W.; Zhong, A.; Niu, W.; Zhao, L.; Dai, Y.; Guo, Z.; Zhang, L.; Lu, J. Differential Expression of MicroRNA in Peripheral Blood Mononuclear Cells as Specific Biomarker for Major Depressive Disorder Patients. J. Psychiatr. Res. 2014, 59, 45–52.	https://doi.org/10.3390/ijms222111312	PBMC	Up-regulated		miR-26b, miR-1972, miR-4485, miR-4498, miR-4743	MAJOR DEPRESSION
Issler, O.; Haramati, S.; Paul, E.D.; Maeno, H.; Navon, I.; Zwang, R.; Gil, S.; Mayberg, H.S.; Dunlop, B.W.; Menke, A.; et al. MicroRNA 135 Is Essential for Chronic Stress Resiliency, Antidepressant Efficacy, and Intact Serotonergic Activity. Neuron 2014, 83, 344–360	https://doi.org/10.3390/ijms222111312	Whole Blood	Down-regulated		miR-135a-5p	MAJOR DEPRESSION
Lopez, J.P.; Lim, R.; Cruceanu, C.; Crapper, L.; Fasano, C.; Labonte, B.; Maussion, G.; Yang, J.P.; Yerko, V.; Vigneault, E.; et al. MiR-1202 Is a Primate-Specific and Brain-Enriched MicroRNA Involved in Major Depression and Antidepressant Treatment. Nat. Med. 2014, 20, 764–768	https://doi.org/10.3390/ijms222111312	Whole Blood	Down-regulated		miR-1202	MAJOR DEPRESSION
Belzeaux, R.; Bergon, A.; Jeanjean, V.; Loriod, B.; Formisano-Tréziny, C.; Verrier, L.; Loundou, A.; Baumstarck-Barrau, K.; Boyer, L.; Gall, V.; et al. Responder and Nonresponder Patients Exhibit Different Peripheral Transcriptional Signatures during Major Depressive Episode. Transl. Psychiatry 2012, 2, e185.	https://doi.org/10.3390/ijms222111312	PBMC	Up-regulated		miR-589, miR-579, miR-941, miR-133a, miR-494, miR-107, miR-148a, miR-652, miR-425-3p	MAJOR DEPRESSION
	https://doi.org/10.3390/ijms222111312	PBMC	Down-regulated		miR-517b, miR-636, miR-1243, miR-381, miR-200c	MAJOR DEPRESSION
Chen, H.; Wang, N.; Burmeister, M.; McInnis, M.G. MicroRNA Expression Changes in Lymphoblastoid Cell Lines in Response to Lithium Treatment. Int. J. Neuropsychopharmacol. 2009, 12, 975	https://doi.org/10.3390/genes13061038	Up-regulated in blood of patients	Up-regulated	Humain	miR-221	BIPOLAR DISORDER
Chen, H.; Wang, N.; Burmeister, M.; McInnis, M.G. MicroRNA Expression Changes in Lymphoblastoid Cell Lines in Response to Lithium Treatment. Int. J. Neuropsychopharmacol. 2009, 12, 975	https://doi.org/10.3390/genes13061038	Up-regulated in blood of patients	Up-regulated	Humain	miR-152	BIPOLAR DISORDER
Chen, H.; Wang, N.; Burmeister, M.; McInnis, M.G. MicroRNA Expression Changes in Lymphoblastoid Cell Lines in Response to Lithium Treatment. Int. J. Neuropsychopharmacol. 2009, 12, 975	https://doi.org/10.3390/genes13061038	Up-regulated in blood of patients	Up-regulated	Humain	miR-15a	BIPOLAR DISORDER
Lim, C.H.; Zainal, N.Z.; Kanagasundram, S.; Zain, S.M.; Mohamed, Z. Preliminary Examination of MicroRNA Expression Profiling in Bipolar Disorder I Patients during Antipsychotic Treatment. Am. J. Med. Genet. Part B Neuropsychiatr. Genet. 2016, 171, 867–874.	https://doi.org/10.3390/genes13061038	Up-regulated in blood of patients	Up-regulated	Humain	miR-18a-5p	BIPOLAR DISORDER
Lim, C.H.; Zainal, N.Z.; Kanagasundram, S.; Zain, S.M.; Mohamed, Z. Preliminary Examination of MicroRNA Expression Profiling in Bipolar Disorder I Patients during Antipsychotic Treatment. Am. J. Med. Genet. Part B Neuropsychiatr. Genet. 2016, 171, 867–874.	https://doi.org/10.3390/genes13061038	Up-regulated in blood of patients	Up-regulated	Humain	miR-19b-3p	BIPOLAR DISORDER
Lim, C.H.; Zainal, N.Z.; Kanagasundram, S.; Zain, S.M.; Mohamed, Z. Preliminary Examination of MicroRNA Expression Profiling in Bipolar Disorder I Patients during Antipsychotic Treatment. Am. J. Med. Genet. Part B Neuropsychiatr. Genet. 2016, 171, 867–874.	https://doi.org/10.3390/genes13061038	Up-regulated in blood of patients	Up-regulated	Humain	miR-145-5p	BIPOLAR DISORDER
Lim, C.H.; Zainal, N.Z.; Kanagasundram, S.; Zain, S.M.; Mohamed, Z. Preliminary Examination of MicroRNA Expression Profiling in Bipolar Disorder I Patients during Antipsychotic Treatment. Am. J. Med. Genet. Part B Neuropsychiatr. Genet. 2016, 171, 867–874.	https://doi.org/10.3390/genes13061038	Up-regulated in blood of patients	Up-regulated	Humain	miR-27a-3p	BIPOLAR DISORDER
Lim, C.H.; Zainal, N.Z.; Kanagasundram, S.; Zain, S.M.; Mohamed, Z. Preliminary Examination of MicroRNA Expression Profiling in Bipolar Disorder I Patients during Antipsychotic Treatment. Am. J. Med. Genet. Part B Neuropsychiatr. Genet. 2016, 171, 867–874.	https://doi.org/10.3390/genes13061038	Up-regulated in blood of patients	Up-regulated	Humain	miR-148b-3p	BIPOLAR DISORDER
Lim, C.H.; Zainal, N.Z.; Kanagasundram, S.; Zain, S.M.; Mohamed, Z. Preliminary Examination of MicroRNA Expression Profiling in Bipolar Disorder I Patients during Antipsychotic Treatment. Am. J. Med. Genet. Part B Neuropsychiatr. Genet. 2016, 171, 867–874.	https://doi.org/10.3390/genes13061038	Up-regulated in blood of patients	Up-regulated	Humain	miR-210-3p	BIPOLAR DISORDER
Lim, C.H.; Zainal, N.Z.; Kanagasundram, S.; Zain, S.M.; Mohamed, Z. Preliminary Examination of MicroRNA Expression Profiling in Bipolar Disorder I Patients during Antipsychotic Treatment. Am. J. Med. Genet. Part B Neuropsychiatr. Genet. 2016, 171, 867–874.	https://doi.org/10.3390/genes13061038	Up-regulated in blood of patients	Up-regulated	Humain	miR-17-3p	BIPOLAR DISORDER
Lim, C.H.; Zainal, N.Z.; Kanagasundram, S.; Zain, S.M.; Mohamed, Z. Preliminary Examination of MicroRNA Expression Profiling in Bipolar Disorder I Patients during Antipsychotic Treatment. Am. J. Med. Genet. Part B Neuropsychiatr. Genet. 2016, 171, 867–874.	https://doi.org/10.3390/genes13061038	Up-regulated in blood of patients	Up-regulated	Humain	miR-30b-5p	BIPOLAR DISORDER
Lim, C.H.; Zainal, N.Z.; Kanagasundram, S.; Zain, S.M.; Mohamed, Z. Preliminary Examination of MicroRNA Expression Profiling in Bipolar Disorder I Patients during Antipsychotic Treatment. Am. J. Med. Genet. Part B Neuropsychiatr. Genet. 2016, 171, 867–874.	https://doi.org/10.3390/genes13061038	Up-regulated in blood of patients	Up-regulated	Humain	miR-106b-5p	BIPOLAR DISORDER
Lim, C.H.; Zainal, N.Z.; Kanagasundram, S.; Zain, S.M.; Mohamed, Z. Preliminary Examination of MicroRNA Expression Profiling in Bipolar Disorder I Patients during Antipsychotic Treatment. Am. J. Med. Genet. Part B Neuropsychiatr. Genet. 2016, 171, 867–874.	https://doi.org/10.3390/genes13061038	Up-regulated in blood of patients	Up-regulated	Humain	miR-339-5p	BIPOLAR DISORDER
Lim, C.H.; Zainal, N.Z.; Kanagasundram, S.; Zain, S.M.; Mohamed, Z. Preliminary Examination of MicroRNA Expression Profiling in Bipolar Disorder I Patients during Antipsychotic Treatment. Am. J. Med. Genet. Part B Neuropsychiatr. Genet. 2016, 171, 867–874.	https://doi.org/10.3390/genes13061038	Up-regulated in blood of patients	Up-regulated	Humain	miR-106a-5p	BIPOLAR DISORDER
Lim, C.H.; Zainal, N.Z.; Kanagasundram, S.; Zain, S.M.; Mohamed, Z. Preliminary Examination of MicroRNA Expression Profiling in Bipolar Disorder I Patients during Antipsychotic Treatment. Am. J. Med. Genet. Part B Neuropsychiatr. Genet. 2016, 171, 867–874.	https://doi.org/10.3390/genes13061038	Up-regulated in blood of patients	Up-regulated	Humain	miR-20a-5p	BIPOLAR DISORDER
Lim, C.H.; Zainal, N.Z.; Kanagasundram, S.; Zain, S.M.; Mohamed, Z. Preliminary Examination of MicroRNA Expression Profiling in Bipolar Disorder I Patients during Antipsychotic Treatment. Am. J. Med. Genet. Part B Neuropsychiatr. Genet. 2016, 171, 867–874.	https://doi.org/10.3390/genes13061038	Up-regulated in blood of patients	Up-regulated	Humain	miR-17-5p	BIPOLAR DISORDER
Lim, C.H.; Zainal, N.Z.; Kanagasundram, S.; Zain, S.M.; Mohamed, Z. Preliminary Examination of MicroRNA Expression Profiling in Bipolar Disorder I Patients during Antipsychotic Treatment. Am. J. Med. Genet. Part B Neuropsychiatr. Genet. 2016, 171, 867–874.	https://doi.org/10.3390/genes13061038	Up-regulated in blood of patients	Up-regulated	Humain	miR-15a-5p	BIPOLAR DISORDER
Pisanu, C.; Merkouri Papadima, E.; Melis, C.; Congiu, D.; Loizedda, A.; Orrù, N.; Calza, S.; Orrù, S.; Carcassi, C.; Severino, G.; et al. Whole Genome Expression Analyses of MiRNAs and MRNAs Suggest the Involvement of MiR-320a and MiR-155-3p and Their Targeted Genes in Lithium Response in Bipolar Disorder. Int. J. Mol. Sci. 2019, 20, 6040.	https://doi.org/10.3390/genes13061038	Up-regulated in blood of patients	Up-regulated	Humain	miR-148a-3p	BIPOLAR DISORDER
Pisanu, C.; Merkouri Papadima, E.; Melis, C.; Congiu, D.; Loizedda, A.; Orrù, N.; Calza, S.; Orrù, S.; Carcassi, C.; Severino, G.; et al. Whole Genome Expression Analyses of MiRNAs and MRNAs Suggest the Involvement of MiR-320a and MiR-155-3p and Their Targeted Genes in Lithium Response in Bipolar Disorder. Int. J. Mol. Sci. 2019, 20, 6040.	https://doi.org/10.3390/genes13061038	Up-regulated in blood of patients	Up-regulated	Humain	miR-22-3p	BIPOLAR DISORDER
Pisanu, C.; Merkouri Papadima, E.; Melis, C.; Congiu, D.; Loizedda, A.; Orrù, N.; Calza, S.; Orrù, S.; Carcassi, C.; Severino, G.; et al. Whole Genome Expression Analyses of MiRNAs and MRNAs Suggest the Involvement of MiR-320a and MiR-155-3p and Their Targeted Genes in Lithium Response in Bipolar Disorder. Int. J. Mol. Sci. 2019, 20, 6040.	https://doi.org/10.3390/genes13061038	Up-regulated in blood of patients	Up-regulated	Humain	miR-26b-5p	BIPOLAR DISORDER
Pisanu, C.; Merkouri Papadima, E.; Melis, C.; Congiu, D.; Loizedda, A.; Orrù, N.; Calza, S.; Orrù, S.; Carcassi, C.; Severino, G.; et al. Whole Genome Expression Analyses of MiRNAs and MRNAs Suggest the Involvement of MiR-320a and MiR-155-3p and Their Targeted Genes in Lithium Response in Bipolar Disorder. Int. J. Mol. Sci. 2019, 20, 6040.	https://doi.org/10.3390/genes13061038	Up-regulated in blood of patients	Up-regulated	Humain	miR-101-3p	BIPOLAR DISORDER
Pisanu, C.; Merkouri Papadima, E.; Melis, C.; Congiu, D.; Loizedda, A.; Orrù, N.; Calza, S.; Orrù, S.; Carcassi, C.; Severino, G.; et al. Whole Genome Expression Analyses of MiRNAs and MRNAs Suggest the Involvement of MiR-320a and MiR-155-3p and Their Targeted Genes in Lithium Response in Bipolar Disorder. Int. J. Mol. Sci. 2019, 20, 6040.	https://doi.org/10.3390/genes13061038	Up-regulated in blood of patients	Up-regulated	Humain	miR-148a-5p	BIPOLAR DISORDER
Pisanu, C.; Merkouri Papadima, E.; Melis, C.; Congiu, D.; Loizedda, A.; Orrù, N.; Calza, S.; Orrù, S.; Carcassi, C.; Severino, G.; et al. Whole Genome Expression Analyses of MiRNAs and MRNAs Suggest the Involvement of MiR-320a and MiR-155-3p and Their Targeted Genes in Lithium Response in Bipolar Disorder. Int. J. Mol. Sci. 2019, 20, 6040.	https://doi.org/10.3390/genes13061038	Up-regulated in blood of patients	Up-regulated	Humain	miR-142-3p	BIPOLAR DISORDER
Pisanu, C.; Merkouri Papadima, E.; Melis, C.; Congiu, D.; Loizedda, A.; Orrù, N.; Calza, S.; Orrù, S.; Carcassi, C.; Severino, G.; et al. Whole Genome Expression Analyses of MiRNAs and MRNAs Suggest the Involvement of MiR-320a and MiR-155-3p and Their Targeted Genes in Lithium Response in Bipolar Disorder. Int. J. Mol. Sci. 2019, 20, 6040.	https://doi.org/10.3390/genes13061038	Up-regulated in blood of patients	Up-regulated	Humain	miR-454-3p	BIPOLAR DISORDER
Pisanu, C.; Merkouri Papadima, E.; Melis, C.; Congiu, D.; Loizedda, A.; Orrù, N.; Calza, S.; Orrù, S.; Carcassi, C.; Severino, G.; et al. Whole Genome Expression Analyses of MiRNAs and MRNAs Suggest the Involvement of MiR-320a and MiR-155-3p and Their Targeted Genes in Lithium Response in Bipolar Disorder. Int. J. Mol. Sci. 2019, 20, 6040.	https://doi.org/10.3390/genes13061038	Up-regulated in blood of patients	Up-regulated	Humain	miR-142-5p	BIPOLAR DISORDER
Pisanu, C.; Merkouri Papadima, E.; Melis, C.; Congiu, D.; Loizedda, A.; Orrù, N.; Calza, S.; Orrù, S.; Carcassi, C.; Severino, G.; et al. Whole Genome Expression Analyses of MiRNAs and MRNAs Suggest the Involvement of MiR-320a and MiR-155-3p and Their Targeted Genes in Lithium Response in Bipolar Disorder. Int. J. Mol. Sci. 2019, 20, 6040.	https://doi.org/10.3390/genes13061038	Up-regulated in blood of patients	Up-regulated	Humain	let-7f-5p	BIPOLAR DISORDER
Pisanu, C.; Merkouri Papadima, E.; Melis, C.; Congiu, D.; Loizedda, A.; Orrù, N.; Calza, S.; Orrù, S.; Carcassi, C.; Severino, G.; et al. Whole Genome Expression Analyses of MiRNAs and MRNAs Suggest the Involvement of MiR-320a and MiR-155-3p and Their Targeted Genes in Lithium Response in Bipolar Disorder. Int. J. Mol. Sci. 2019, 20, 6040.	https://doi.org/10.3390/genes13061038	Up-regulated in blood of patients	Up-regulated	Humain	miR-27a-5p	BIPOLAR DISORDER
Pisanu, C.; Merkouri Papadima, E.; Melis, C.; Congiu, D.; Loizedda, A.; Orrù, N.; Calza, S.; Orrù, S.; Carcassi, C.; Severino, G.; et al. Whole Genome Expression Analyses of MiRNAs and MRNAs Suggest the Involvement of MiR-320a and MiR-155-3p and Their Targeted Genes in Lithium Response in Bipolar Disorder. Int. J. Mol. Sci. 2019, 20, 6040.	https://doi.org/10.3390/genes13061038	Up-regulated in blood of patients	Up-regulated	Humain	let-7a-5p	BIPOLAR DISORDER
Pisanu, C.; Merkouri Papadima, E.; Melis, C.; Congiu, D.; Loizedda, A.; Orrù, N.; Calza, S.; Orrù, S.; Carcassi, C.; Severino, G.; et al. Whole Genome Expression Analyses of MiRNAs and MRNAs Suggest the Involvement of MiR-320a and MiR-155-3p and Their Targeted Genes in Lithium Response in Bipolar Disorder. Int. J. Mol. Sci. 2019, 20, 6040.	https://doi.org/10.3390/genes13061038	Up-regulated in blood of patients	Up-regulated	Humain	miR-146a-5p	BIPOLAR DISORDER
Pisanu, C.; Merkouri Papadima, E.; Melis, C.; Congiu, D.; Loizedda, A.; Orrù, N.; Calza, S.; Orrù, S.; Carcassi, C.; Severino, G.; et al. Whole Genome Expression Analyses of MiRNAs and MRNAs Suggest the Involvement of MiR-320a and MiR-155-3p and Their Targeted Genes in Lithium Response in Bipolar Disorder. Int. J. Mol. Sci. 2019, 20, 6040.	https://doi.org/10.3390/genes13061038	Up-regulated in blood of patients	Up-regulated	Humain	miR-15b-5p	BIPOLAR DISORDER
Pisanu, C.; Merkouri Papadima, E.; Melis, C.; Congiu, D.; Loizedda, A.; Orrù, N.; Calza, S.; Orrù, S.; Carcassi, C.; Severino, G.; et al. Whole Genome Expression Analyses of MiRNAs and MRNAs Suggest the Involvement of MiR-320a and MiR-155-3p and Their Targeted Genes in Lithium Response in Bipolar Disorder. Int. J. Mol. Sci. 2019, 20, 6040.	https://doi.org/10.3390/genes13061038	Up-regulated in blood of patients	Up-regulated	Humain	miR-335-3p	BIPOLAR DISORDER
Pisanu, C.; Merkouri Papadima, E.; Melis, C.; Congiu, D.; Loizedda, A.; Orrù, N.; Calza, S.; Orrù, S.; Carcassi, C.; Severino, G.; et al. Whole Genome Expression Analyses of MiRNAs and MRNAs Suggest the Involvement of MiR-320a and MiR-155-3p and Their Targeted Genes in Lithium Response in Bipolar Disorder. Int. J. Mol. Sci. 2019, 20, 6040.	https://doi.org/10.3390/genes13061038	Up-regulated in blood of patients	Up-regulated	Humain	miR-421	BIPOLAR DISORDER
Pisanu, C.; Merkouri Papadima, E.; Melis, C.; Congiu, D.; Loizedda, A.; Orrù, N.; Calza, S.; Orrù, S.; Carcassi, C.; Severino, G.; et al. Whole Genome Expression Analyses of MiRNAs and MRNAs Suggest the Involvement of MiR-320a and MiR-155-3p and Their Targeted Genes in Lithium Response in Bipolar Disorder. Int. J. Mol. Sci. 2019, 20, 6040.	https://doi.org/10.3390/genes13061038	Up-regulated in blood of patients	Up-regulated	Humain	miR-26a-5p	BIPOLAR DISORDER
Pisanu, C.; Merkouri Papadima, E.; Melis, C.; Congiu, D.; Loizedda, A.; Orrù, N.; Calza, S.; Orrù, S.; Carcassi, C.; Severino, G.; et al. Whole Genome Expression Analyses of MiRNAs and MRNAs Suggest the Involvement of MiR-320a and MiR-155-3p and Their Targeted Genes in Lithium Response in Bipolar Disorder. Int. J. Mol. Sci. 2019, 20, 6040.	https://doi.org/10.3390/genes13061038	Up-regulated in blood of patients	Up-regulated	Humain	miR-223-3p	BIPOLAR DISORDER
Pisanu, C.; Merkouri Papadima, E.; Melis, C.; Congiu, D.; Loizedda, A.; Orrù, N.; Calza, S.; Orrù, S.; Carcassi, C.; Severino, G.; et al. Whole Genome Expression Analyses of MiRNAs and MRNAs Suggest the Involvement of MiR-320a and MiR-155-3p and Their Targeted Genes in Lithium Response in Bipolar Disorder. Int. J. Mol. Sci. 2019, 20, 6040.	https://doi.org/10.3390/genes13061038	Up-regulated in blood of patients	Up-regulated	Humain	miR-155-3p	BIPOLAR DISORDER
Pisanu, C.; Merkouri Papadima, E.; Melis, C.; Congiu, D.; Loizedda, A.; Orrù, N.; Calza, S.; Orrù, S.; Carcassi, C.; Severino, G.; et al. Whole Genome Expression Analyses of MiRNAs and MRNAs Suggest the Involvement of MiR-320a and MiR-155-3p and Their Targeted Genes in Lithium Response in Bipolar Disorder. Int. J. Mol. Sci. 2019, 20, 6040.	https://doi.org/10.3390/genes13061038	Up-regulated in blood of patients	Up-regulated	Humain	miR-744-5p	BIPOLAR DISORDER
Pisanu, C.; Merkouri Papadima, E.; Melis, C.; Congiu, D.; Loizedda, A.; Orrù, N.; Calza, S.; Orrù, S.; Carcassi, C.; Severino, G.; et al. Whole Genome Expression Analyses of MiRNAs and MRNAs Suggest the Involvement of MiR-320a and MiR-155-3p and Their Targeted Genes in Lithium Response in Bipolar Disorder. Int. J. Mol. Sci. 2019, 20, 6040.	https://doi.org/10.3390/genes13061038	Up-regulated in blood of patients	Up-regulated	Humain	miR-181a-3p	BIPOLAR DISORDER
Pisanu, C.; Merkouri Papadima, E.; Melis, C.; Congiu, D.; Loizedda, A.; Orrù, N.; Calza, S.; Orrù, S.; Carcassi, C.; Severino, G.; et al. Whole Genome Expression Analyses of MiRNAs and MRNAs Suggest the Involvement of MiR-320a and MiR-155-3p and Their Targeted Genes in Lithium Response in Bipolar Disorder. Int. J. Mol. Sci. 2019, 20, 6040.	https://doi.org/10.3390/genes13061038	Up-regulated in blood of patients	Up-regulated	Humain	miR-15a-5p	BIPOLAR DISORDER
Pisanu, C.; Merkouri Papadima, E.; Melis, C.; Congiu, D.; Loizedda, A.; Orrù, N.; Calza, S.; Orrù, S.; Carcassi, C.; Severino, G.; et al. Whole Genome Expression Analyses of MiRNAs and MRNAs Suggest the Involvement of MiR-320a and MiR-155-3p and Their Targeted Genes in Lithium Response in Bipolar Disorder. Int. J. Mol. Sci. 2019, 20, 6040.	https://doi.org/10.3390/genes13061038	Up-regulated in blood of patients	Up-regulated	Humain	miR-148b-3p	BIPOLAR DISORDER
Pisanu, C.; Merkouri Papadima, E.; Melis, C.; Congiu, D.; Loizedda, A.; Orrù, N.; Calza, S.; Orrù, S.; Carcassi, C.; Severino, G.; et al. Whole Genome Expression Analyses of MiRNAs and MRNAs Suggest the Involvement of MiR-320a and MiR-155-3p and Their Targeted Genes in Lithium Response in Bipolar Disorder. Int. J. Mol. Sci. 2019, 20, 6040.	https://doi.org/10.3390/genes13061038	Up-regulated in blood of patients	Up-regulated	Humain	miR-15b-3p	BIPOLAR DISORDER
Pisanu, C.; Merkouri Papadima, E.; Melis, C.; Congiu, D.; Loizedda, A.; Orrù, N.; Calza, S.; Orrù, S.; Carcassi, C.; Severino, G.; et al. Whole Genome Expression Analyses of MiRNAs and MRNAs Suggest the Involvement of MiR-320a and MiR-155-3p and Their Targeted Genes in Lithium Response in Bipolar Disorder. Int. J. Mol. Sci. 2019, 20, 6040.	https://doi.org/10.3390/genes13061038	Up-regulated in blood of patients	Up-regulated	Humain	miR-454-5p	BIPOLAR DISORDER
Pisanu, C.; Merkouri Papadima, E.; Melis, C.; Congiu, D.; Loizedda, A.; Orrù, N.; Calza, S.; Orrù, S.; Carcassi, C.; Severino, G.; et al. Whole Genome Expression Analyses of MiRNAs and MRNAs Suggest the Involvement of MiR-320a and MiR-155-3p and Their Targeted Genes in Lithium Response in Bipolar Disorder. Int. J. Mol. Sci. 2019, 20, 6040.	https://doi.org/10.3390/genes13061038	Up-regulated in blood of patients	Up-regulated	Humain	miR-4677-3p	BIPOLAR DISORDER
Pisanu, C.; Merkouri Papadima, E.; Melis, C.; Congiu, D.; Loizedda, A.; Orrù, N.; Calza, S.; Orrù, S.; Carcassi, C.; Severino, G.; et al. Whole Genome Expression Analyses of MiRNAs and MRNAs Suggest the Involvement of MiR-320a and MiR-155-3p and Their Targeted Genes in Lithium Response in Bipolar Disorder. Int. J. Mol. Sci. 2019, 20, 6040.	https://doi.org/10.3390/genes13061038	Up-regulated in blood of patients	Up-regulated	Humain	miR-374a-3p	BIPOLAR DISORDER
Pisanu, C.; Merkouri Papadima, E.; Melis, C.; Congiu, D.; Loizedda, A.; Orrù, N.; Calza, S.; Orrù, S.; Carcassi, C.; Severino, G.; et al. Whole Genome Expression Analyses of MiRNAs and MRNAs Suggest the Involvement of MiR-320a and MiR-155-3p and Their Targeted Genes in Lithium Response in Bipolar Disorder. Int. J. Mol. Sci. 2019, 20, 6040.	https://doi.org/10.3390/genes13061038	Up-regulated in blood of patients	Up-regulated	Humain	miR-19b-3p	BIPOLAR DISORDER
Chen, H.; Wang, N.; Burmeister, M.; McInnis, M.G. MicroRNA Expression Changes in Lymphoblastoid Cell Lines in Response to Lithium Treatment. Int. J. Neuropsychopharmacol. 2009, 12, 975	https://doi.org/10.3390/genes13061038	Down-regulated in blood of patients	Down-regulated	Humain	miR-494	BIPOLAR DISORDER
Lim, C.H.; Zainal, N.Z.; Kanagasundram, S.; Zain, S.M.; Mohamed, Z. Preliminary Examination of MicroRNA Expression Profiling in Bipolar Disorder I Patients during Antipsychotic Treatment. Am. J. Med. Genet. Part B Neuropsychiatr. Genet. 2016, 171, 867–874.	https://doi.org/10.3390/genes13061038	Down-regulated in blood of patients	Down-regulated	Humain	miR-92b-5p	BIPOLAR DISORDER
Lim, C.H.; Zainal, N.Z.; Kanagasundram, S.; Zain, S.M.; Mohamed, Z. Preliminary Examination of MicroRNA Expression Profiling in Bipolar Disorder I Patients during Antipsychotic Treatment. Am. J. Med. Genet. Part B Neuropsychiatr. Genet. 2016, 171, 867–874.	https://doi.org/10.3390/genes13061038	Down-regulated in blood of patients	Down-regulated	Humain	miR-664b-5p	BIPOLAR DISORDER
Lim, C.H.; Zainal, N.Z.; Kanagasundram, S.; Zain, S.M.; Mohamed, Z. Preliminary Examination of MicroRNA Expression Profiling in Bipolar Disorder I Patients during Antipsychotic Treatment. Am. J. Med. Genet. Part B Neuropsychiatr. Genet. 2016, 171, 867–874.	https://doi.org/10.3390/genes13061038	Down-regulated in blood of patients	Down-regulated	Humain	miR-1343-5p	BIPOLAR DISORDER
Lim, C.H.; Zainal, N.Z.; Kanagasundram, S.; Zain, S.M.; Mohamed, Z. Preliminary Examination of MicroRNA Expression Profiling in Bipolar Disorder I Patients during Antipsychotic Treatment. Am. J. Med. Genet. Part B Neuropsychiatr. Genet. 2016, 171, 867–874.	https://doi.org/10.3390/genes13061038	Down-regulated in blood of patients	Down-regulated	Humain	miR-6778-5p	BIPOLAR DISORDER
Lim, C.H.; Zainal, N.Z.; Kanagasundram, S.; Zain, S.M.; Mohamed, Z. Preliminary Examination of MicroRNA Expression Profiling in Bipolar Disorder I Patients during Antipsychotic Treatment. Am. J. Med. Genet. Part B Neuropsychiatr. Genet. 2016, 171, 867–874.	https://doi.org/10.3390/genes13061038	Down-regulated in blood of patients	Down-regulated	Humain	miR-146b-5p	BIPOLAR DISORDER
Pisanu, C.; Merkouri Papadima, E.; Melis, C.; Congiu, D.; Loizedda, A.; Orrù, N.; Calza, S.; Orrù, S.; Carcassi, C.; Severino, G.; et al. Whole Genome Expression Analyses of MiRNAs and MRNAs Suggest the Involvement of MiR-320a and MiR-155-3p and Their Targeted Genes in Lithium Response in Bipolar Disorder. Int. J. Mol. Sci. 2019, 20, 6040.	https://doi.org/10.3390/genes13061038	Down-regulated in blood of patients	Down-regulated	Humain	miR-320a	BIPOLAR DISORDER
Pisanu, C.; Merkouri Papadima, E.; Melis, C.; Congiu, D.; Loizedda, A.; Orrù, N.; Calza, S.; Orrù, S.; Carcassi, C.; Severino, G.; et al. Whole Genome Expression Analyses of MiRNAs and MRNAs Suggest the Involvement of MiR-320a and MiR-155-3p and Their Targeted Genes in Lithium Response in Bipolar Disorder. Int. J. Mol. Sci. 2019, 20, 6040.	https://doi.org/10.3390/genes13061038	Down-regulated in blood of patients	Down-regulated	Humain	miR-125a-5p	BIPOLAR DISORDER
Pisanu, C.; Merkouri Papadima, E.; Melis, C.; Congiu, D.; Loizedda, A.; Orrù, N.; Calza, S.; Orrù, S.; Carcassi, C.; Severino, G.; et al. Whole Genome Expression Analyses of MiRNAs and MRNAs Suggest the Involvement of MiR-320a and MiR-155-3p and Their Targeted Genes in Lithium Response in Bipolar Disorder. Int. J. Mol. Sci. 2019, 20, 6040.	https://doi.org/10.3390/genes13061038	Down-regulated in blood of patients	Down-regulated	Humain	miR-574-3p	BIPOLAR DISORDER
Pisanu, C.; Merkouri Papadima, E.; Melis, C.; Congiu, D.; Loizedda, A.; Orrù, N.; Calza, S.; Orrù, S.; Carcassi, C.; Severino, G.; et al. Whole Genome Expression Analyses of MiRNAs and MRNAs Suggest the Involvement of MiR-320a and MiR-155-3p and Their Targeted Genes in Lithium Response in Bipolar Disorder. Int. J. Mol. Sci. 2019, 20, 6040.	https://doi.org/10.3390/genes13061038	Down-regulated in blood of patients	Down-regulated	Humain	miR-1273h-3p	BIPOLAR DISORDER
Pisanu, C.; Merkouri Papadima, E.; Melis, C.; Congiu, D.; Loizedda, A.; Orrù, N.; Calza, S.; Orrù, S.; Carcassi, C.; Severino, G.; et al. Whole Genome Expression Analyses of MiRNAs and MRNAs Suggest the Involvement of MiR-320a and MiR-155-3p and Their Targeted Genes in Lithium Response in Bipolar Disorder. Int. J. Mol. Sci. 2019, 20, 6040.	https://doi.org/10.3390/genes13061038	Down-regulated in blood of patients	Down-regulated	Humain	miR-9-5p	BIPOLAR DISORDER
Pisanu, C.; Merkouri Papadima, E.; Melis, C.; Congiu, D.; Loizedda, A.; Orrù, N.; Calza, S.; Orrù, S.; Carcassi, C.; Severino, G.; et al. Whole Genome Expression Analyses of MiRNAs and MRNAs Suggest the Involvement of MiR-320a and MiR-155-3p and Their Targeted Genes in Lithium Response in Bipolar Disorder. Int. J. Mol. Sci. 2019, 20, 6040.	https://doi.org/10.3390/genes13061038	Down-regulated in blood of patients	Down-regulated	Humain	miR-378a-5p	BIPOLAR DISORDER
Pisanu, C.; Merkouri Papadima, E.; Melis, C.; Congiu, D.; Loizedda, A.; Orrù, N.; Calza, S.; Orrù, S.; Carcassi, C.; Severino, G.; et al. Whole Genome Expression Analyses of MiRNAs and MRNAs Suggest the Involvement of MiR-320a and MiR-155-3p and Their Targeted Genes in Lithium Response in Bipolar Disorder. Int. J. Mol. Sci. 2019, 20, 6040.	https://doi.org/10.3390/genes13061038	Down-regulated in blood of patients	Down-regulated	Humain	miR-505-3p	BIPOLAR DISORDER
Pisanu, C.; Merkouri Papadima, E.; Melis, C.; Congiu, D.; Loizedda, A.; Orrù, N.; Calza, S.; Orrù, S.; Carcassi, C.; Severino, G.; et al. Whole Genome Expression Analyses of MiRNAs and MRNAs Suggest the Involvement of MiR-320a and MiR-155-3p and Their Targeted Genes in Lithium Response in Bipolar Disorder. Int. J. Mol. Sci. 2019, 20, 6040.	https://doi.org/10.3390/genes13061038	Down-regulated in blood of patients	Down-regulated	Humain	let-7e-5p	BIPOLAR DISORDER
Pisanu, C.; Merkouri Papadima, E.; Melis, C.; Congiu, D.; Loizedda, A.; Orrù, N.; Calza, S.; Orrù, S.; Carcassi, C.; Severino, G.; et al. Whole Genome Expression Analyses of MiRNAs and MRNAs Suggest the Involvement of MiR-320a and MiR-155-3p and Their Targeted Genes in Lithium Response in Bipolar Disorder. Int. J. Mol. Sci. 2019, 20, 6040.	https://doi.org/10.3390/genes13061038	Down-regulated in blood of patients	Down-regulated	Humain	miR-138-5p	BIPOLAR DISORDER
Pisanu, C.; Merkouri Papadima, E.; Melis, C.; Congiu, D.; Loizedda, A.; Orrù, N.; Calza, S.; Orrù, S.; Carcassi, C.; Severino, G.; et al. Whole Genome Expression Analyses of MiRNAs and MRNAs Suggest the Involvement of MiR-320a and MiR-155-3p and Their Targeted Genes in Lithium Response in Bipolar Disorder. Int. J. Mol. Sci. 2019, 20, 6040.	https://doi.org/10.3390/genes13061038	Down-regulated in blood of patients	Down-regulated	Humain	miR-941	BIPOLAR DISORDER
Pisanu, C.; Merkouri Papadima, E.; Melis, C.; Congiu, D.; Loizedda, A.; Orrù, N.; Calza, S.; Orrù, S.; Carcassi, C.; Severino, G.; et al. Whole Genome Expression Analyses of MiRNAs and MRNAs Suggest the Involvement of MiR-320a and MiR-155-3p and Their Targeted Genes in Lithium Response in Bipolar Disorder. Int. J. Mol. Sci. 2019, 20, 6040.	https://doi.org/10.3390/genes13061038	Down-regulated in blood of patients	Down-regulated	Humain	miR-652-3p	BIPOLAR DISORDER
Pisanu, C.; Merkouri Papadima, E.; Melis, C.; Congiu, D.; Loizedda, A.; Orrù, N.; Calza, S.; Orrù, S.; Carcassi, C.; Severino, G.; et al. Whole Genome Expression Analyses of MiRNAs and MRNAs Suggest the Involvement of MiR-320a and MiR-155-3p and Their Targeted Genes in Lithium Response in Bipolar Disorder. Int. J. Mol. Sci. 2019, 20, 6040.	https://doi.org/10.3390/genes13061038	Down-regulated in blood of patients	Down-regulated	Humain	miR-130b-3p	BIPOLAR DISORDER
Pisanu, C.; Merkouri Papadima, E.; Melis, C.; Congiu, D.; Loizedda, A.; Orrù, N.; Calza, S.; Orrù, S.; Carcassi, C.; Severino, G.; et al. Whole Genome Expression Analyses of MiRNAs and MRNAs Suggest the Involvement of MiR-320a and MiR-155-3p and Their Targeted Genes in Lithium Response in Bipolar Disorder. Int. J. Mol. Sci. 2019, 20, 6040.	https://doi.org/10.3390/genes13061038	Down-regulated in blood of patients	Down-regulated	Humain	miR-345-5p	BIPOLAR DISORDER
Pisanu, C.; Merkouri Papadima, E.; Melis, C.; Congiu, D.; Loizedda, A.; Orrù, N.; Calza, S.; Orrù, S.; Carcassi, C.; Severino, G.; et al. Whole Genome Expression Analyses of MiRNAs and MRNAs Suggest the Involvement of MiR-320a and MiR-155-3p and Their Targeted Genes in Lithium Response in Bipolar Disorder. Int. J. Mol. Sci. 2019, 20, 6040.	https://doi.org/10.3390/genes13061038	Down-regulated in blood of patients	Down-regulated	Humain	let-7d-3p	BIPOLAR DISORDER
Pisanu, C.; Merkouri Papadima, E.; Melis, C.; Congiu, D.; Loizedda, A.; Orrù, N.; Calza, S.; Orrù, S.; Carcassi, C.; Severino, G.; et al. Whole Genome Expression Analyses of MiRNAs and MRNAs Suggest the Involvement of MiR-320a and MiR-155-3p and Their Targeted Genes in Lithium Response in Bipolar Disorder. Int. J. Mol. Sci. 2019, 20, 6040.	https://doi.org/10.3390/genes13061038	Down-regulated in blood of patients	Down-regulated	Humain	miR-181d-5p	BIPOLAR DISORDER
Pisanu, C.; Merkouri Papadima, E.; Melis, C.; Congiu, D.; Loizedda, A.; Orrù, N.; Calza, S.; Orrù, S.; Carcassi, C.; Severino, G.; et al. Whole Genome Expression Analyses of MiRNAs and MRNAs Suggest the Involvement of MiR-320a and MiR-155-3p and Their Targeted Genes in Lithium Response in Bipolar Disorder. Int. J. Mol. Sci. 2019, 20, 6040.	https://doi.org/10.3390/genes13061038	Down-regulated in blood of patients	Down-regulated	Humain	miR-629-5p	BIPOLAR DISORDER
Pisanu, C.; Merkouri Papadima, E.; Melis, C.; Congiu, D.; Loizedda, A.; Orrù, N.; Calza, S.; Orrù, S.; Carcassi, C.; Severino, G.; et al. Whole Genome Expression Analyses of MiRNAs and MRNAs Suggest the Involvement of MiR-320a and MiR-155-3p and Their Targeted Genes in Lithium Response in Bipolar Disorder. Int. J. Mol. Sci. 2019, 20, 6040.	https://doi.org/10.3390/genes13061038	Down-regulated in blood of patients	Down-regulated	Humain	miR-574-5p	BIPOLAR DISORDER
Pisanu, C.; Merkouri Papadima, E.; Melis, C.; Congiu, D.; Loizedda, A.; Orrù, N.; Calza, S.; Orrù, S.; Carcassi, C.; Severino, G.; et al. Whole Genome Expression Analyses of MiRNAs and MRNAs Suggest the Involvement of MiR-320a and MiR-155-3p and Their Targeted Genes in Lithium Response in Bipolar Disorder. Int. J. Mol. Sci. 2019, 20, 6040.	https://doi.org/10.3390/genes13061038	Down-regulated in blood of patients	Down-regulated	Humain	miR-378a-3p	BIPOLAR DISORDER
Pisanu, C.; Merkouri Papadima, E.; Melis, C.; Congiu, D.; Loizedda, A.; Orrù, N.; Calza, S.; Orrù, S.; Carcassi, C.; Severino, G.; et al. Whole Genome Expression Analyses of MiRNAs and MRNAs Suggest the Involvement of MiR-320a and MiR-155-3p and Their Targeted Genes in Lithium Response in Bipolar Disorder. Int. J. Mol. Sci. 2019, 20, 6040.	https://doi.org/10.3390/genes13061038	Down-regulated in blood of patients	Down-regulated	Humain	miR-598-3p	BIPOLAR DISORDER
Pisanu, C.; Merkouri Papadima, E.; Melis, C.; Congiu, D.; Loizedda, A.; Orrù, N.; Calza, S.; Orrù, S.; Carcassi, C.; Severino, G.; et al. Whole Genome Expression Analyses of MiRNAs and MRNAs Suggest the Involvement of MiR-320a and MiR-155-3p and Their Targeted Genes in Lithium Response in Bipolar Disorder. Int. J. Mol. Sci. 2019, 20, 6040.	https://doi.org/10.3390/genes13061038	Down-regulated in blood of patients	Down-regulated	Humain	miR-23a-3p	BIPOLAR DISORDER
Pisanu, C.; Merkouri Papadima, E.; Melis, C.; Congiu, D.; Loizedda, A.; Orrù, N.; Calza, S.; Orrù, S.; Carcassi, C.; Severino, G.; et al. Whole Genome Expression Analyses of MiRNAs and MRNAs Suggest the Involvement of MiR-320a and MiR-155-3p and Their Targeted Genes in Lithium Response in Bipolar Disorder. Int. J. Mol. Sci. 2019, 20, 6040.	https://doi.org/10.3390/genes13061038	Down-regulated in blood of patients	Down-regulated	Humain	miR-425-5p	BIPOLAR DISORDER
Pisanu, C.; Merkouri Papadima, E.; Melis, C.; Congiu, D.; Loizedda, A.; Orrù, N.; Calza, S.; Orrù, S.; Carcassi, C.; Severino, G.; et al. Whole Genome Expression Analyses of MiRNAs and MRNAs Suggest the Involvement of MiR-320a and MiR-155-3p and Their Targeted Genes in Lithium Response in Bipolar Disorder. Int. J. Mol. Sci. 2019, 20, 6040.	https://doi.org/10.3390/genes13061038	Down-regulated in blood of patients	Down-regulated	Humain	miR-197-3p	BIPOLAR DISORDER
Pisanu, C.; Merkouri Papadima, E.; Melis, C.; Congiu, D.; Loizedda, A.; Orrù, N.; Calza, S.; Orrù, S.; Carcassi, C.; Severino, G.; et al. Whole Genome Expression Analyses of MiRNAs and MRNAs Suggest the Involvement of MiR-320a and MiR-155-3p and Their Targeted Genes in Lithium Response in Bipolar Disorder. Int. J. Mol. Sci. 2019, 20, 6040.	https://doi.org/10.3390/genes13061038	Down-regulated in blood of patients	Down-regulated	Humain	miR-194-5p	BIPOLAR DISORDER

## Sheet: ST 3
Supplementary table VII: overlap of miRNA between previous studies and the the ones we identified
Supplementary Table III
MIRNA	PREVIOUSLY_KNOW	DISCOVERED_IN_PSYCOURSE
let-7a	TRUE	TRUE
let-7f-1	FALSE	TRUE
miR-103a	FALSE	TRUE
miR-106a	TRUE	TRUE
miR-106b	TRUE	TRUE
miR-107	TRUE	TRUE
miR-1271	FALSE	TRUE
miR-1285	FALSE	TRUE
miR-130a	TRUE	TRUE
miR-130b	TRUE	TRUE
miR-132	TRUE	TRUE
miR-139	FALSE	TRUE
miR-140	FALSE	TRUE
miR-142	TRUE	TRUE
miR-144	FALSE	TRUE
miR-145	TRUE	TRUE
miR-146b	TRUE	TRUE
miR-152	TRUE	TRUE
miR-15a	TRUE	TRUE
miR-15b	TRUE	TRUE
miR-16	TRUE	TRUE
miR-17	TRUE	TRUE
miR-181a	TRUE	TRUE
miR-186	FALSE	TRUE
miR-18a	TRUE	TRUE
miR-194	TRUE	TRUE
miR-196b	FALSE	TRUE
miR-199a	TRUE	TRUE
miR-199b	TRUE	TRUE
miR-19a	TRUE	TRUE
miR-19b	TRUE	TRUE
miR-21	TRUE	TRUE
miR-215	FALSE	TRUE
miR-22	TRUE	TRUE
miR-23a	TRUE	TRUE
miR-24	TRUE	TRUE
miR-26b	TRUE	TRUE
miR-27b	TRUE	TRUE
miR-28	TRUE	TRUE
miR-29a	TRUE	TRUE
miR-29b	TRUE	TRUE
miR-29c	TRUE	TRUE
miR-30b	TRUE	TRUE
miR-30d	TRUE	TRUE
miR-324	TRUE	TRUE
miR-338	TRUE	TRUE
miR-340	TRUE	TRUE
miR-3613	FALSE	TRUE
miR-362	TRUE	TRUE
miR-363	FALSE	TRUE
miR-374a	TRUE	TRUE
miR-378c	FALSE	TRUE
miR-381	TRUE	TRUE
miR-425	TRUE	TRUE
miR-450a	FALSE	TRUE
miR-451a	FALSE	TRUE
miR-495	TRUE	TRUE
miR-500a	FALSE	TRUE
miR-501	FALSE	TRUE
miR-548ah	FALSE	TRUE
miR-548am	FALSE	TRUE
miR-548bc	FALSE	TRUE
miR-548e	FALSE	TRUE
miR-548o	FALSE	TRUE
miR-548p	FALSE	TRUE
miR-5695	FALSE	TRUE
miR-576	TRUE	TRUE
miR-598	TRUE	TRUE
miR-618	FALSE	TRUE
miR-641	FALSE	TRUE
miR-654	TRUE	TRUE
miR-660	TRUE	TRUE
miR-96	FALSE	TRUE
miR-98	FALSE	TRUE
let-7b	TRUE	TRUE
miR-1229	FALSE	TRUE
miR-1238	FALSE	TRUE
miR-1306	FALSE	TRUE
miR-155	TRUE	TRUE
miR-197	TRUE	TRUE
miR-2110	FALSE	TRUE
miR-3124	FALSE	TRUE
miR-3135a	FALSE	TRUE
miR-320a	TRUE	TRUE
miR-320b	TRUE	TRUE
miR-320d	FALSE	TRUE
miR-320e	FALSE	TRUE
miR-423	TRUE	TRUE
miR-4433b	FALSE	TRUE
miR-4732	FALSE	TRUE
miR-4738	FALSE	TRUE
miR-5009	FALSE	TRUE
miR-5010	FALSE	TRUE
miR-505	TRUE	TRUE
miR-574	TRUE	TRUE
miR-589	TRUE	TRUE
miR-625	FALSE	TRUE
miR-6741	FALSE	TRUE
miR-6786	FALSE	TRUE
miR-6802	FALSE	TRUE
miR-6857	FALSE	TRUE
miR-6859	FALSE	TRUE
miR-6866	FALSE	TRUE
miR-6881	FALSE	TRUE
miR-7706	FALSE	TRUE
miR-92a	FALSE	TRUE
miR-326	FALSE	TRUE
miR-451b	FALSE	TRUE
miR-548ac	FALSE	TRUE
miR-584	TRUE	TRUE
miR-937	FALSE	TRUE
miR-99b	FALSE	TRUE
let-7g	FALSE	TRUE
let-7i	FALSE	TRUE
miR-101	TRUE	TRUE
miR-126	FALSE	TRUE
miR-143	FALSE	TRUE
miR-146a	TRUE	TRUE
miR-148b	TRUE	TRUE
miR-20a	TRUE	TRUE
miR-20b	TRUE	TRUE
miR-210	TRUE	TRUE
miR-221	TRUE	TRUE
miR-23b	FALSE	TRUE
miR-24-2	FALSE	TRUE
miR-26a	TRUE	TRUE
miR-27a	TRUE	TRUE
miR-30e	TRUE	TRUE
miR-3143	FALSE	TRUE
miR-339	TRUE	TRUE
miR-345	TRUE	TRUE
miR-374b	FALSE	TRUE
miR-378a	TRUE	TRUE
miR-378d	FALSE	TRUE
miR-421	TRUE	TRUE
miR-4511	FALSE	TRUE
miR-4521	FALSE	TRUE
miR-454	TRUE	TRUE
miR-4742	FALSE	TRUE
miR-491	TRUE	TRUE
miR-499a	FALSE	TRUE
miR-502	TRUE	TRUE
miR-579	TRUE	TRUE
miR-616	FALSE	TRUE
miR-6513	FALSE	TRUE
miR-652	TRUE	TRUE
miR-769	FALSE	TRUE
miR-93	FALSE	TRUE
let-7e	TRUE	TRUE
miR-10399	FALSE	TRUE
miR-10a	TRUE	TRUE
miR-10b	FALSE	TRUE
miR-11401	FALSE	TRUE
miR-1178	FALSE	TRUE
miR-127	FALSE	TRUE
miR-1270	FALSE	TRUE
miR-1288	FALSE	TRUE
miR-1294	FALSE	TRUE
miR-1304	FALSE	TRUE
miR-151a	FALSE	TRUE
miR-181a-2	FALSE	TRUE
miR-182	TRUE	TRUE
miR-1843	FALSE	TRUE
miR-219a-1	FALSE	TRUE
miR-30a	TRUE	TRUE
miR-3133	FALSE	TRUE
miR-3150a	FALSE	TRUE
miR-3158	FALSE	TRUE
miR-3163	FALSE	TRUE
miR-3173	FALSE	TRUE
miR-3177	FALSE	TRUE
miR-3605	FALSE	TRUE
miR-3691	FALSE	TRUE
miR-4435	FALSE	TRUE
miR-4661	FALSE	TRUE
miR-4664	FALSE	TRUE
miR-4746	FALSE	TRUE
miR-486	TRUE	TRUE
miR-5189	FALSE	TRUE
miR-629	TRUE	TRUE
miR-6514	FALSE	TRUE
miR-659	FALSE	TRUE
miR-671	FALSE	TRUE
miR-6747	FALSE	TRUE
miR-6783	FALSE	TRUE
miR-6806	FALSE	TRUE
miR-6842	FALSE	TRUE
miR-6852	FALSE	TRUE
miR-92b	TRUE	TRUE
miR-941	TRUE	TRUE
miR-943	FALSE	TRUE
miR-198	TRUE	FALSE
miR-206	TRUE	FALSE
miR-7	TRUE	FALSE
miR-195	TRUE	FALSE
miR-92	TRUE	FALSE
miR-212	TRUE	FALSE
miR-9*	TRUE	FALSE
miR-181b	TRUE	FALSE
miR-134	TRUE	FALSE
miR-140*	TRUE	FALSE
miR-151	TRUE	FALSE
miR-18	TRUE	FALSE
miR-185	TRUE	FALSE
miR-224	TRUE	FALSE
miR-323	TRUE	FALSE
miR-325	TRUE	FALSE
miR-383	TRUE	FALSE
miR-409	TRUE	FALSE
miR-422b	TRUE	FALSE
miR-494	TRUE	FALSE
miR-532	TRUE	FALSE
miR-540	TRUE	FALSE
miR-669a	TRUE	FALSE
miR-673	TRUE	FALSE
miR-674	TRUE	FALSE
miR-674*	TRUE	FALSE
miR-708	TRUE	FALSE
miR-93,	TRUE	FALSE
miR-125b	TRUE	FALSE
miR-128a	TRUE	FALSE
miR-128b	TRUE	FALSE
miR-129	TRUE	FALSE
miR-133b	TRUE	FALSE
miR-138	TRUE	FALSE
miR-148a	TRUE	FALSE
miR-150	TRUE	FALSE
miR-199a*	TRUE	FALSE
miR-222	TRUE	FALSE
miR-296	TRUE	FALSE
miR-328	TRUE	FALSE
miR-330	TRUE	FALSE
miR-335	TRUE	FALSE
miR-373*	TRUE	FALSE
miR-432*	TRUE	FALSE
miR-452*	TRUE	FALSE
miR-455	TRUE	FALSE
miR-484	TRUE	FALSE
miR-485	TRUE	FALSE
miR-487a	TRUE	FALSE
miR-489	TRUE	FALSE
miR-499	TRUE	FALSE
miR-517a	TRUE	FALSE
miR-517c	TRUE	FALSE
miR-518b	TRUE	FALSE
miR-519d	TRUE	FALSE
miR-520a*	TRUE	FALSE
miR-520 g	TRUE	FALSE
miR-99a	TRUE	FALSE
let-7d	TRUE	FALSE
miR-105	TRUE	FALSE
miR-126*	TRUE	FALSE
miR-153	TRUE	FALSE
miR-181d	TRUE	FALSE
miR-184	TRUE	FALSE
miR-219	TRUE	FALSE
miR-223	TRUE	FALSE
miR-302a*	TRUE	FALSE
miR-302b*	TRUE	FALSE
miR-31	TRUE	FALSE
miR-33	TRUE	FALSE
miR-512	TRUE	FALSE
miR-519b	TRUE	FALSE
let-7f-2	TRUE	FALSE
miR-188	TRUE	FALSE
pre-miR-18b	TRUE	FALSE
pre-miR-502	TRUE	FALSE
pre-miR-505	TRUE	FALSE
miR-509	TRUE	FALSE
miR-510	TRUE	FALSE
miR-124-1	TRUE	FALSE
miR-320	TRUE	FALSE
miR-596	TRUE	FALSE
miR-597	TRUE	FALSE
miR-598,	TRUE	FALSE
miR-346	TRUE	FALSE
miR-132*	TRUE	FALSE
miR-154*	TRUE	FALSE
miR-34a	TRUE	FALSE
miR-544	TRUE	FALSE
pre-miR-30e	TRUE	FALSE
miR-1275	TRUE	FALSE
miR-128	TRUE	FALSE
miR-130b*	TRUE	FALSE
miR-150*	TRUE	FALSE
miR-16-2*	TRUE	FALSE
miR-200c	TRUE	FALSE
miR-29b-1*	TRUE	FALSE
miR-30e*	TRUE	FALSE
miR-329	TRUE	FALSE
miR-335*	TRUE	FALSE
miR-342	TRUE	FALSE
miR-431	TRUE	FALSE
miR-432	TRUE	FALSE
miR-487b	TRUE	FALSE
miR-625*	TRUE	FALSE
miR-664	TRUE	FALSE
miR-877	TRUE	FALSE
miR-99b,	TRUE	FALSE
miR-449a	TRUE	FALSE
miR-548d	TRUE	FALSE
miR-564	TRUE	FALSE
miR-572	TRUE	FALSE
miR-652,	TRUE	FALSE
miR-151 miR-27b	TRUE	FALSE
miR-301	TRUE	FALSE
miR-545	TRUE	FALSE
miR-639 miR-106b	TRUE	FALSE
miR-193b	TRUE	FALSE
miR-154	TRUE	FALSE
miR-187	TRUE	FALSE
miR-193a	TRUE	FALSE
miR-25	TRUE	FALSE
miR-382	TRUE	FALSE
miR-433	TRUE	FALSE
miR-519c	TRUE	FALSE
miR-542	TRUE	FALSE
miR-548b	TRUE	FALSE
miR-590	TRUE	FALSE
miR-592	TRUE	FALSE
miR-767	TRUE	FALSE
miR-92b,	TRUE	FALSE
miR-137	TRUE	FALSE
miR-301a	TRUE	FALSE
miR-376a	TRUE	FALSE
miR-190	TRUE	FALSE
miR-497	TRUE	FALSE
miR-218	TRUE	FALSE
miR-215	TRUE	FALSE
miR-192	TRUE	FALSE
miR-202	TRUE	FALSE
miR-219a-2	TRUE	FALSE
miR-511	TRUE	FALSE
miR-483	TRUE	FALSE
miR-200a	TRUE	FALSE
NA	TRUE	FALSE
miR-128	TRUE	FALSE
miR-331	TRUE	FALSE
miR-323a	TRUE	FALSE
miR-204	TRUE	FALSE
miR-197	TRUE	FALSE
miR-9	TRUE	FALSE
miR-34b	TRUE	FALSE
miR-34c	TRUE	FALSE
miR-135b	TRUE	FALSE
miR-1202	TRUE	FALSE
let-7f	TRUE	FALSE
miR-1915	TRUE	FALSE
miR-124	TRUE	FALSE
let-7c	TRUE	FALSE
miR-583	TRUE	FALSE
miR-650	TRUE	FALSE
miR-644	TRUE	FALSE
miR-450b	TRUE	FALSE
miR-1972	TRUE	FALSE
miR-4485	TRUE	FALSE
miR-4498	TRUE	FALSE
miR-4743	TRUE	FALSE
miR-135a	TRUE	FALSE
miR-133a	TRUE	FALSE
miR-517b	TRUE	FALSE
miR-636	TRUE	FALSE
miR-1243	TRUE	FALSE
miR-744	TRUE	FALSE
miR-4677	TRUE	FALSE
miR-664b	TRUE	FALSE
miR-1343	TRUE	FALSE
miR-6778	TRUE	FALSE
miR-125a	TRUE	FALSE
miR-1273h	TRUE	FALSE

## Sheet: ST 4
Supplementary table IV: number of miRNA for which TWAS model was computed, and cis-heritability
Colonne1	Number of miRNAsa	Colonne2	Colonne3	Colonne4	TWAS modelse	Colonne5
Cohort	TWAS Disorders	Expressedb	Weights computedc	HSQd	cis-h2	SNPsf
					Mean (range)	Mean (range)
Discovery	Bipolar Disorders	495	256	155	0.05026092578125 (0.00019 - 0.589981)	751 (1 - 6156)
	Schizophrenia		203	111	0.0382058733108108 (4e-06 - 0.661974)	473 (1 - 4251)
Validation	Bipolar Disorders		296	206	0.0549557857142857 (0.00019 - 0.589981)	911 (1 - 6156)
	Schizophrenia		246	163	0.0414620609756098 (4e-06 - 0.661974)	569 (1 - 4251)
	a	Some matures miRNAs are present multiple time with different precursors
	b	Expressed miRNAs are defined as miRNA with >= 5 reads in at least half the samples
	c	Number of miRNAs for which a TWAS model could be computed
	d	Number of miRNAs with an heritability test <= 0.05
	e	Concern all miRNAs for which the TWAS model could be computed
	f	Number of SNPs used to compute the weights

## Sheet: ST 5
Supplementary table V: TWAS heritability
miRNA	Heritability_Discovery	Heritability_Validation	could be associated to SCZ GWAS summary	could be associated to BD GWAS summary
hsa-let-7a-3p_hsa-let-7a-3	0.06901	0.1758	TRUE	TRUE
hsa-let-7a-5p_hsa-let-7a-1	0.148	#N/A	FALSE	FALSE
hsa-let-7a-5p_hsa-let-7a-3	0.3439	#N/A	FALSE	FALSE
hsa-let-7b-3p_hsa-let-7b	#N/A	0.283	FALSE	FALSE
hsa-let-7b-5p_hsa-let-7b	0.2388	0.1821	FALSE	TRUE
hsa-let-7d-3p_hsa-let-7d	0.461	#N/A	FALSE	FALSE
hsa-let-7d-5p_hsa-let-7d	0.08853	0.2423	FALSE	TRUE
hsa-let-7e-5p_hsa-let-7e	#N/A	0.3821	FALSE	FALSE
hsa-let-7f-5p_hsa-let-7f-1	0.3891	0.1688	FALSE	FALSE
hsa-let-7g-5p_hsa-let-7g	#N/A	0.1855	FALSE	FALSE
hsa-let-7i-3p_hsa-let-7i	0.1748	#N/A	FALSE	FALSE
hsa-let-7i-5p_hsa-let-7i	0.2328	#N/A	FALSE	FALSE
hsa-miR-100-5p_hsa-mir-100	0	0	FALSE	FALSE
hsa-miR-101-3p_hsa-mir-101-1	#N/A	0.1305	FALSE	FALSE
hsa-miR-101-3p_hsa-mir-101-2	0.3237	0.3478	FALSE	FALSE
hsa-miR-10399-3p_hsa-mir-10399	0.2017	0.2366	TRUE	TRUE
hsa-miR-10527-5p_hsa-mir-10527	#N/A	0.4546	FALSE	FALSE
hsa-miR-106b-3p_hsa-mir-106b	0.4035	0.1521	FALSE	TRUE
hsa-miR-106b-5p_hsa-mir-106b	#N/A	0.1898	FALSE	FALSE
hsa-miR-107_hsa-mir-107	0.4876	#N/A	FALSE	FALSE
hsa-miR-10a-5p_hsa-mir-10a	0.1079	2.217e-06	TRUE	TRUE
hsa-miR-11400_hsa-mir-11400	3.122e-09	0.0002114	TRUE	TRUE
hsa-miR-11401_hsa-mir-11401	2.366e-07	0	FALSE	FALSE
hsa-miR-1178-3p_hsa-mir-1178	#N/A	0.0013	FALSE	FALSE
hsa-miR-1180-3p_hsa-mir-1180	0.3033	0.002148	FALSE	TRUE
hsa-miR-1229-3p_hsa-mir-1229	0.01339	0.07494	TRUE	TRUE
hsa-miR-1249-3p_hsa-mir-1249	#N/A	0.07414	FALSE	FALSE
hsa-miR-1255a_hsa-mir-1255a	0	0	FALSE	FALSE
hsa-miR-1255b-5p_hsa-mir-1255b-1	#N/A	0.246	FALSE	FALSE
hsa-miR-1255b-5p_hsa-mir-1255b-2	0.006739	#N/A	FALSE	FALSE
hsa-miR-125a-5p_hsa-mir-125a	0.06101	0.0002879	TRUE	TRUE
hsa-miR-125b-5p_hsa-mir-125b-1	0	0	FALSE	FALSE
hsa-miR-125b-5p_hsa-mir-125b-2	#N/A	0.2519	FALSE	FALSE
hsa-miR-1260a_hsa-mir-1260a	0.2079	0.4153	TRUE	TRUE
hsa-miR-127-3p_hsa-mir-127	0.0003586	0	FALSE	FALSE
hsa-miR-1270_hsa-mir-1270	0.3085	1.897e-12	TRUE	TRUE
hsa-miR-1271-5p_hsa-mir-1271	0.3879	0.01865	FALSE	TRUE
hsa-miR-1273c_hsa-mir-1273c	0.2754	0.4764	FALSE	TRUE
hsa-miR-128-3p_hsa-mir-128-1	0.3098	0.0008449	TRUE	TRUE
hsa-miR-128-3p_hsa-mir-128-2	0.1563	#N/A	FALSE	FALSE
hsa-miR-1284_hsa-mir-1284	0.2213	0.4119	TRUE	TRUE
hsa-miR-1285-3p_hsa-mir-1285-2	0.4572	#N/A	FALSE	FALSE
hsa-miR-1285-5p_hsa-mir-1285-1	#N/A	0.1036	FALSE	FALSE
hsa-miR-1287-5p_hsa-mir-1287	1.373e-11	0	FALSE	FALSE
hsa-miR-1288-3p_hsa-mir-1288	0.02772	0.0002902	TRUE	TRUE
hsa-miR-129-1-3p_hsa-mir-129-1	0.06642	0.4378	TRUE	TRUE
hsa-miR-1292-5p_hsa-mir-1292	#N/A	0.07174	FALSE	FALSE
hsa-miR-1294_hsa-mir-1294	#N/A	0.0004685	FALSE	FALSE
hsa-miR-1301-3p_hsa-mir-1301	#N/A	0.1069	FALSE	FALSE
hsa-miR-1303_hsa-mir-1303	5.412e-14	0	FALSE	FALSE
hsa-miR-1304-3p_hsa-mir-1304	0.0001662	0.02719	FALSE	FALSE
hsa-miR-1304-5p_hsa-mir-1304	0.3538	0.05407	FALSE	TRUE
hsa-miR-1306-3p_hsa-mir-1306	#N/A	0.3935	FALSE	FALSE
hsa-miR-1306-5p_hsa-mir-1306	0.0008692	0.005166	TRUE	TRUE
hsa-miR-1307-3p_hsa-mir-1307	1.962e-07	1.003e-07	FALSE	FALSE
hsa-miR-1307-5p_hsa-mir-1307	1.273e-05	3.765e-12	FALSE	FALSE
hsa-miR-130a-3p_hsa-mir-130a	0.2742	0.002308	TRUE	TRUE
hsa-miR-130b-3p_hsa-mir-130b	0.4839	0.4557	FALSE	FALSE
hsa-miR-130b-5p_hsa-mir-130b	0.0008218	9.946e-11	FALSE	FALSE
hsa-miR-132-3p_hsa-mir-132	0.2654	0.02825	FALSE	TRUE
hsa-miR-132-5p_hsa-mir-132	#N/A	0.00359	FALSE	FALSE
hsa-miR-134-5p_hsa-mir-134	0.004479	3.746e-12	FALSE	FALSE
hsa-miR-1343-3p_hsa-mir-1343	2.325e-09	0	FALSE	FALSE
hsa-miR-139-3p_hsa-mir-139	0.1906	0.0001507	TRUE	TRUE
hsa-miR-139-5p_hsa-mir-139	0.1102	1.614e-12	FALSE	FALSE
hsa-miR-140-3p_hsa-mir-140	0.2087	#N/A	FALSE	FALSE
hsa-miR-140-5p_hsa-mir-140	#N/A	0.3195	FALSE	FALSE
hsa-miR-142-5p_hsa-mir-142	0.2782	#N/A	FALSE	FALSE
hsa-miR-143-3p_hsa-mir-143	0.4724	0.01927	FALSE	FALSE
hsa-miR-144-3p_hsa-mir-144	0.4203	#N/A	FALSE	FALSE
hsa-miR-144-5p_hsa-mir-144	#N/A	0.4374	FALSE	FALSE
hsa-miR-145-3p_hsa-mir-145	0.2718	0.184	TRUE	TRUE
hsa-miR-145-5p_hsa-mir-145	0.3642	0.463	TRUE	TRUE
hsa-miR-146a-5p_hsa-mir-146a	0.3852	0.01453	TRUE	TRUE
hsa-miR-146b-3p_hsa-mir-146b	0.3519	#N/A	FALSE	FALSE
hsa-miR-146b-5p_hsa-mir-146b	0.3704	0.009108	TRUE	TRUE
hsa-miR-148a-3p_hsa-mir-148a	#N/A	0.121	FALSE	FALSE
hsa-miR-148a-5p_hsa-mir-148a	0.09953	0.06766	TRUE	TRUE
hsa-miR-148b-3p_hsa-mir-148b	#N/A	0.3513	FALSE	FALSE
hsa-miR-148b-5p_hsa-mir-148b	#N/A	0.2434	FALSE	FALSE
hsa-miR-150-3p_hsa-mir-150	0.1136	0.06847	FALSE	TRUE
hsa-miR-150-5p_hsa-mir-150	#N/A	0.2492	FALSE	FALSE
hsa-miR-151a-3p_hsa-mir-151a	0.1417	0.004011	FALSE	FALSE
hsa-miR-151a-5p_hsa-mir-151a	0.005023	6.009e-13	TRUE	TRUE
hsa-miR-152-3p_hsa-mir-152	0.01229	6.796e-11	FALSE	FALSE
hsa-miR-1538_hsa-mir-1538	0.2271	0.139	FALSE	TRUE
hsa-miR-155-5p_hsa-mir-155	#N/A	0.09476	FALSE	FALSE
hsa-miR-15a-5p_hsa-mir-15a	0.1137	0.03638	TRUE	TRUE
hsa-miR-15b-3p_hsa-mir-15b	#N/A	0.4881	FALSE	FALSE
hsa-miR-15b-5p_hsa-mir-15b	#N/A	0.4321	FALSE	FALSE
hsa-miR-16-2-3p_hsa-mir-16-2	#N/A	0.1274	FALSE	FALSE
hsa-miR-16-5p_hsa-mir-16-1	0.2545	0.1939	FALSE	FALSE
hsa-miR-16-5p_hsa-mir-16-2	0.1939	0.1939	TRUE	TRUE
hsa-miR-17-3p_hsa-mir-17	0.2565	0.2565	TRUE	TRUE
hsa-miR-181a-2-3p_hsa-mir-181a-2	0.1694	0.05791	FALSE	TRUE
hsa-miR-181a-3p_hsa-mir-181a-1	5.168e-07	0	FALSE	FALSE
hsa-miR-181a-5p_hsa-mir-181a-1	0.004562	1.489e-11	FALSE	FALSE
hsa-miR-181a-5p_hsa-mir-181a-2	1.489e-11	0.1033	TRUE	TRUE
hsa-miR-181b-5p_hsa-mir-181b-1	4.274e-05	4.04e-09	FALSE	FALSE
hsa-miR-181b-5p_hsa-mir-181b-2	#N/A	0.2144	FALSE	FALSE
hsa-miR-181d-5p_hsa-mir-181d	0.4296	0.3526	FALSE	TRUE
hsa-miR-182-5p_hsa-mir-182	0.01673	4.286e-09	FALSE	FALSE
hsa-miR-183-3p_hsa-mir-183	0.003786	0.00741	TRUE	TRUE
hsa-miR-183-5p_hsa-mir-183	0.003184	8.907e-05	TRUE	TRUE
hsa-miR-185-3p_hsa-mir-185	#N/A	0.4348	FALSE	FALSE
hsa-miR-185-5p_hsa-mir-185	0.1467	0.1024	FALSE	TRUE
hsa-miR-186-5p_hsa-mir-186	0.4924	0.2437	TRUE	TRUE
hsa-miR-18a-3p_hsa-mir-18a	#N/A	0.3675	FALSE	FALSE
hsa-miR-1908-5p_hsa-mir-1908	2.09e-06	2.249e-13	FALSE	FALSE
hsa-miR-191-3p_hsa-mir-191	2.249e-13	0.2443	TRUE	TRUE
hsa-miR-191-5p_hsa-mir-191	0.4897	#N/A	FALSE	FALSE
hsa-miR-192-5p_hsa-mir-192	0.2231	#N/A	FALSE	FALSE
hsa-miR-193a-5p_hsa-mir-193a	0.07832	0.0002021	TRUE	TRUE
hsa-miR-194-5p_hsa-mir-194-1	0.466	0.455	FALSE	TRUE
hsa-miR-194-5p_hsa-mir-194-2	0.44	#N/A	FALSE	FALSE
hsa-miR-196b-5p_hsa-mir-196b	0.291	0.04285	FALSE	TRUE
hsa-miR-197-3p_hsa-mir-197	0.4623	0.01623	TRUE	TRUE
hsa-miR-1976_hsa-mir-1976	0.03069	#N/A	FALSE	FALSE
hsa-miR-199a-3p_hsa-mir-199a-1	0.4656	0.04728	TRUE	TRUE
hsa-miR-199a-3p_hsa-mir-199a-2	0.4046	#N/A	FALSE	FALSE
hsa-miR-199a-5p_hsa-mir-199a-1	#N/A	0.08256	FALSE	FALSE
hsa-miR-199b-3p_hsa-mir-199b	0.05639	0.3041	TRUE	TRUE
hsa-miR-200c-3p_hsa-mir-200c	0.02378	0.4893	FALSE	TRUE
hsa-miR-21-5p_hsa-mir-21	0.3087	#N/A	FALSE	FALSE
hsa-miR-210-3p_hsa-mir-210	0.3981	#N/A	FALSE	FALSE
hsa-miR-210-5p_hsa-mir-210	0.1195	0.155	FALSE	TRUE
hsa-miR-2110_hsa-mir-2110	0.006511	3.042e-14	FALSE	FALSE
hsa-miR-212-5p_hsa-mir-212	#N/A	0.3228	FALSE	FALSE
hsa-miR-215-5p_hsa-mir-215	0.1236	#N/A	FALSE	FALSE
hsa-miR-219a-1-3p_hsa-mir-219a-1	0.01257	0.002532	TRUE	TRUE
hsa-miR-22-3p_hsa-mir-22	0.03511	0.001256	FALSE	FALSE
hsa-miR-22-5p_hsa-mir-22	0.1632	0.1394	TRUE	TRUE
hsa-miR-23a-3p_hsa-mir-23a	0.2893	0.1074	FALSE	TRUE
hsa-miR-24-2-5p_hsa-mir-24-2	0.009494	#N/A	FALSE	FALSE
hsa-miR-24-3p_hsa-mir-24-1	#N/A	0.2495	FALSE	FALSE
hsa-miR-24-3p_hsa-mir-24-2	0.2055	#N/A	FALSE	FALSE
hsa-miR-25-3p_hsa-mir-25	0.05754	#N/A	FALSE	FALSE
hsa-miR-26a-5p_hsa-mir-26a-1	0.4791	0.4336	TRUE	TRUE
hsa-miR-26b-3p_hsa-mir-26b	0.2742	0.08435	FALSE	TRUE
hsa-miR-26b-5p_hsa-mir-26b	0.05608	0.2086	TRUE	TRUE
hsa-miR-27a-3p_hsa-mir-27a	0.05403	#N/A	FALSE	FALSE
hsa-miR-27a-5p_hsa-mir-27a	#N/A	0.3055	FALSE	FALSE
hsa-miR-27b-3p_hsa-mir-27b	0.1066	0.1451	TRUE	TRUE
hsa-miR-28-3p_hsa-mir-28	0.1413	0.0262	FALSE	TRUE
hsa-miR-28-5p_hsa-mir-28	#N/A	0.003239	FALSE	FALSE
hsa-miR-296-5p_hsa-mir-296	0.03431	0.06961	TRUE	TRUE
hsa-miR-29a-3p_hsa-mir-29a	0.366	#N/A	FALSE	FALSE
hsa-miR-29b-2-5p_hsa-mir-29b-2	0.2022	0.3392	TRUE	TRUE
hsa-miR-29b-3p_hsa-mir-29b-1	#N/A	0.1836	FALSE	FALSE
hsa-miR-29b-3p_hsa-mir-29b-2	#N/A	0.1569	FALSE	FALSE
hsa-miR-29c-3p_hsa-mir-29c	#N/A	0.1565	FALSE	FALSE
hsa-miR-29c-5p_hsa-mir-29c	#N/A	0.2518	FALSE	FALSE
hsa-miR-301a-5p_hsa-mir-301a	0.2875	#N/A	FALSE	FALSE
hsa-miR-3074-5p_hsa-mir-3074	4.317e-09	2.977e-10	FALSE	FALSE
hsa-miR-30a-3p_hsa-mir-30a	0.007348	2.105e-11	FALSE	FALSE
hsa-miR-30a-5p_hsa-mir-30a	0	0	FALSE	FALSE
hsa-miR-30b-5p_hsa-mir-30b	0.3433	0.1796	TRUE	TRUE
hsa-miR-30c-5p_hsa-mir-30c-2	#N/A	0.3238	FALSE	FALSE
hsa-miR-30d-3p_hsa-mir-30d	#N/A	0.3322	FALSE	FALSE
hsa-miR-30d-5p_hsa-mir-30d	#N/A	0.0008817	FALSE	FALSE
hsa-miR-30e-3p_hsa-mir-30e	#N/A	0.482	FALSE	FALSE
hsa-miR-3124-5p_hsa-mir-3124	0.1518	9.5e-05	TRUE	TRUE
hsa-miR-3127-3p_hsa-mir-3127	0.4037	0.1268	FALSE	TRUE
hsa-miR-3130-5p_hsa-mir-3130-1	0	0	FALSE	FALSE
hsa-miR-3130-5p_hsa-mir-3130-2	0	0	FALSE	FALSE
hsa-miR-3133_hsa-mir-3133	8.713e-05	8.504e-12	FALSE	FALSE
hsa-miR-3135a_hsa-mir-3135a	0.001321	5.551e-17	FALSE	FALSE
hsa-miR-3150a-5p_hsa-mir-3150a	0.006562	0.0006635	TRUE	TRUE
hsa-miR-3157-3p_hsa-mir-3157	0.01584	#N/A	FALSE	FALSE
hsa-miR-3163_hsa-mir-3163	#N/A	0.3915	FALSE	FALSE
hsa-miR-3173-5p_hsa-mir-3173	0.07482	#N/A	FALSE	FALSE
hsa-miR-3177-3p_hsa-mir-3177	0.2296	#N/A	FALSE	FALSE
hsa-miR-3187-3p_hsa-mir-3187	#N/A	0.1893	FALSE	FALSE
hsa-miR-3200-3p_hsa-mir-3200	0.2889	1.592e-09	TRUE	TRUE
hsa-miR-3200-5p_hsa-mir-3200	0.06308	2.33e-05	TRUE	TRUE
hsa-miR-320a-3p_hsa-mir-320a	0.1245	#N/A	FALSE	FALSE
hsa-miR-320b_hsa-mir-320b-1	0.1021	0.4581	TRUE	TRUE
hsa-miR-320b_hsa-mir-320b-2	0.4581	0.468	FALSE	TRUE
hsa-miR-320c_hsa-mir-320c-1	#N/A	0.4856	FALSE	FALSE
hsa-miR-320c_hsa-mir-320c-2	0.06534	0.1319	TRUE	TRUE
hsa-miR-320d_hsa-mir-320d-1	0.02512	#N/A	FALSE	FALSE
hsa-miR-323a-3p_hsa-mir-323a	0.0002155	0	FALSE	FALSE
hsa-miR-323b-3p_hsa-mir-323b	1.993e-10	0	FALSE	FALSE
hsa-miR-324-3p_hsa-mir-324	#N/A	0.03578	FALSE	FALSE
hsa-miR-324-5p_hsa-mir-324	#N/A	0.4061	FALSE	FALSE
hsa-miR-326_hsa-mir-326	0.002111	0.0006611	TRUE	TRUE
hsa-miR-328-3p_hsa-mir-328	#N/A	0.4223	FALSE	FALSE
hsa-miR-329-3p_hsa-mir-329-1	7.904e-05	4.815e-11	FALSE	FALSE
hsa-miR-329-3p_hsa-mir-329-2	7.904e-05	4.815e-11	FALSE	FALSE
hsa-miR-330-3p_hsa-mir-330	#N/A	0.002852	FALSE	FALSE
hsa-miR-330-5p_hsa-mir-330	0.2433	0.008412	FALSE	TRUE
hsa-miR-331-5p_hsa-mir-331	0.06731	0.01984	FALSE	TRUE
hsa-miR-335-3p_hsa-mir-335	0.01902	1.776e-09	FALSE	FALSE
hsa-miR-335-5p_hsa-mir-335	#N/A	0.01203	FALSE	FALSE
hsa-miR-338-5p_hsa-mir-338	0.3888	0.03174	FALSE	FALSE
hsa-miR-339-3p_hsa-mir-339	4.496e-15	0	FALSE	FALSE
hsa-miR-339-5p_hsa-mir-339	0.001284	9.541e-13	FALSE	FALSE
hsa-miR-340-3p_hsa-mir-340	0.1469	#N/A	FALSE	FALSE
hsa-miR-340-5p_hsa-mir-340	#N/A	0.1838	FALSE	FALSE
hsa-miR-342-3p_hsa-mir-342	#N/A	0.262	FALSE	FALSE
hsa-miR-342-5p_hsa-mir-342	#N/A	0.05128	FALSE	FALSE
hsa-miR-345-5p_hsa-mir-345	0.09865	0.04068	TRUE	TRUE
hsa-miR-3605-3p_hsa-mir-3605	0.01309	7.458e-07	TRUE	TRUE
hsa-miR-3613-3p_hsa-mir-3613	0.1327	#N/A	FALSE	FALSE
hsa-miR-3613-5p_hsa-mir-3613	0.1695	0.08999	TRUE	TRUE
hsa-miR-3615_hsa-mir-3615	0.1421	0.1651	TRUE	TRUE
hsa-miR-365a-3p_hsa-mir-365a	0.1545	#N/A	FALSE	FALSE
hsa-miR-3691-5p_hsa-mir-3691	#N/A	0.003155	FALSE	FALSE
hsa-miR-370-3p_hsa-mir-370	1.549e-06	0	FALSE	FALSE
hsa-miR-378a-5p_hsa-mir-378a	0.2918	#N/A	FALSE	FALSE
hsa-miR-378c_hsa-mir-378c	#N/A	0.3597	FALSE	FALSE
hsa-miR-378d_hsa-mir-378d-1	#N/A	0.3674	FALSE	FALSE
hsa-miR-379-5p_hsa-mir-379	0.001609	1.893e-05	FALSE	FALSE
hsa-miR-381-3p_hsa-mir-381	0.00329	5.15e-12	FALSE	FALSE
hsa-miR-382-5p_hsa-mir-382	0.02875	6.099e-11	FALSE	FALSE
hsa-miR-3913-5p_hsa-mir-3913-1	#N/A	0.2235	FALSE	FALSE
hsa-miR-3913-5p_hsa-mir-3913-2	0.2235	0.2235	TRUE	TRUE
hsa-miR-3940-3p_hsa-mir-3940	0.1717	0.05478	FALSE	TRUE
hsa-miR-409-3p_hsa-mir-409	0.001292	0	FALSE	FALSE
hsa-miR-422a_hsa-mir-422a	#N/A	0.1418	FALSE	FALSE
hsa-miR-423-3p_hsa-mir-423	0.0493	0.4996	TRUE	TRUE
hsa-miR-423-5p_hsa-mir-423	0.04775	#N/A	FALSE	FALSE
hsa-miR-425-3p_hsa-mir-425	0.3143	0.1177	FALSE	FALSE
hsa-miR-425-5p_hsa-mir-425	0.3463	#N/A	FALSE	FALSE
hsa-miR-4286_hsa-mir-4286	#N/A	0.2138	FALSE	FALSE
hsa-miR-4301_hsa-mir-4301	0.06355	#N/A	FALSE	FALSE
hsa-miR-4326_hsa-mir-4326	1.271e-14	0	FALSE	FALSE
hsa-miR-433-3p_hsa-mir-433	1.747e-06	0	FALSE	FALSE
hsa-miR-4433b-5p_hsa-mir-4433b	1.61e-15	0	FALSE	FALSE
hsa-miR-4435_hsa-mir-4435-1	0	#N/A	FALSE	FALSE
hsa-miR-4435_hsa-mir-4435-2	0.132	1.765e-05	FALSE	FALSE
hsa-miR-4473_hsa-mir-4473	0.04749	1.564e-05	TRUE	TRUE
hsa-miR-4504_hsa-mir-4504	0.2904	#N/A	FALSE	FALSE
hsa-miR-4508_hsa-mir-4508	#N/A	0.4526	FALSE	FALSE
hsa-miR-4511_hsa-mir-4511	0	0	FALSE	FALSE
hsa-miR-451a_hsa-mir-451a	0.2655	0.169	FALSE	FALSE
hsa-miR-451b_hsa-mir-451b	0.1811	0.1197	TRUE	TRUE
hsa-miR-4521_hsa-mir-4521	0.2266	0.1096	TRUE	TRUE
hsa-miR-454-5p_hsa-mir-454	0.4429	#N/A	FALSE	FALSE
hsa-miR-4635_hsa-mir-4635	0.001435	2.334e-08	FALSE	FALSE
hsa-miR-4646-3p_hsa-mir-4646	0.09341	0.1451	TRUE	TRUE
hsa-miR-4659a-3p_hsa-mir-4659a	#N/A	0.03631	FALSE	FALSE
hsa-miR-4659b-3p_hsa-mir-4659b	#N/A	0.0004035	FALSE	FALSE
hsa-miR-4661-5p_hsa-mir-4661	0.2749	0.0001445	TRUE	TRUE
hsa-miR-4672_hsa-mir-4672	0.1206	0.3228	FALSE	TRUE
hsa-miR-4677-3p_hsa-mir-4677	0.05807	0.001255	TRUE	TRUE
hsa-miR-4677-5p_hsa-mir-4677	0.04408	0.0008474	FALSE	TRUE
hsa-miR-4685-3p_hsa-mir-4685	0.0252	0.0006784	FALSE	FALSE
hsa-miR-4707-3p_hsa-mir-4707	0	0	FALSE	FALSE
hsa-miR-4732-3p_hsa-mir-4732	#N/A	0.104	FALSE	FALSE
hsa-miR-4738-3p_hsa-mir-4738	#N/A	0.1566	FALSE	FALSE
hsa-miR-4742-3p_hsa-mir-4742	0.2	0.1463	TRUE	TRUE
hsa-miR-4746-5p_hsa-mir-4746	0.03131	5.561e-05	FALSE	FALSE
hsa-miR-4755-5p_hsa-mir-4755	#N/A	0.001089	FALSE	FALSE
hsa-miR-4781-3p_hsa-mir-4781	#N/A	0.146	FALSE	FALSE
hsa-miR-485-3p_hsa-mir-485	7.585e-06	3.053e-15	FALSE	FALSE
hsa-miR-486-5p_hsa-mir-486-1	0.4169	0.2338	FALSE	TRUE
hsa-miR-486-5p_hsa-mir-486-2	0.4249	0.2449	FALSE	FALSE
hsa-miR-491-5p_hsa-mir-491	#N/A	0.4384	FALSE	FALSE
hsa-miR-493-3p_hsa-mir-493	9.206e-06	2.859e-14	FALSE	FALSE
hsa-miR-493-5p_hsa-mir-493	0.05623	3.656e-10	FALSE	FALSE
hsa-miR-494-3p_hsa-mir-494	3.627e-06	3.738e-11	FALSE	FALSE
hsa-miR-495-3p_hsa-mir-495	0.0004424	5.653e-10	FALSE	FALSE
hsa-miR-499a-5p_hsa-mir-499a	0.2582	0.0001227	TRUE	TRUE
hsa-miR-5009-5p_hsa-mir-5009	0.2814	0.227	FALSE	TRUE
hsa-miR-5189-3p_hsa-mir-5189	0	0	FALSE	FALSE
hsa-miR-5193_hsa-mir-5193	#N/A	0.01697	FALSE	FALSE
hsa-miR-543_hsa-mir-543	7.976e-06	0	FALSE	FALSE
hsa-miR-548ac_hsa-mir-548ac	0.2183	0.003679	TRUE	TRUE
hsa-miR-548ay-3p_hsa-mir-548ay	0.1071	6.25e-10	TRUE	TRUE
hsa-miR-548bc_hsa-mir-548bc	0.2126	#N/A	FALSE	FALSE
hsa-miR-548e-3p_hsa-mir-548e	#N/A	0.09586	FALSE	FALSE
hsa-miR-548j-5p_hsa-mir-548j	0.0201	8.957e-11	FALSE	FALSE
hsa-miR-548o-3p_hsa-mir-548o-2	0.02748	#N/A	FALSE	FALSE
hsa-miR-548p_hsa-mir-548p	0.1739	0.3887	FALSE	TRUE
hsa-miR-550a-3-5p_hsa-mir-550a-1	#N/A	0.2782	FALSE	FALSE
hsa-miR-550a-3-5p_hsa-mir-550a-2	0.0007755	0	TRUE	TRUE
hsa-miR-550a-3-5p_hsa-mir-550a-3	0.06294	1.217e-12	TRUE	TRUE
hsa-miR-550a-3p_hsa-mir-550a-2	0.01581	0.02297	TRUE	TRUE
hsa-miR-550a-5p_hsa-mir-550a-1	#N/A	0.2747	FALSE	FALSE
hsa-miR-550a-5p_hsa-mir-550a-2	0.0007019	0	TRUE	TRUE
hsa-miR-5581-3p_hsa-mir-5581	0.2062	#N/A	FALSE	FALSE
hsa-miR-5690_hsa-mir-5690	#N/A	0.03041	FALSE	FALSE
hsa-miR-5695_hsa-mir-5695	#N/A	0.2219	FALSE	FALSE
hsa-miR-574-3p_hsa-mir-574	0.1735	0.01051	TRUE	TRUE
hsa-miR-574-5p_hsa-mir-574	0.1466	0.1385	TRUE	TRUE
hsa-miR-581_hsa-mir-581	0.1602	0.04154	FALSE	TRUE
hsa-miR-582-3p_hsa-mir-582	0.00174	2.965e-05	FALSE	FALSE
hsa-miR-584-3p_hsa-mir-584	0.3922	0.0422	FALSE	TRUE
hsa-miR-584-5p_hsa-mir-584	#N/A	0.08642	FALSE	FALSE
hsa-miR-589-5p_hsa-mir-589	0.3828	0.4102	TRUE	TRUE
hsa-miR-597-3p_hsa-mir-597	#N/A	0.1434	FALSE	FALSE
hsa-miR-598-3p_hsa-mir-598	0.01203	0.03667	TRUE	TRUE
hsa-miR-610_hsa-mir-610	#N/A	0.0009365	FALSE	FALSE
hsa-miR-616-5p_hsa-mir-616	#N/A	0.3925	FALSE	FALSE
hsa-miR-618_hsa-mir-618	5.516e-05	0	FALSE	FALSE
hsa-miR-625-3p_hsa-mir-625	0.001104	5.385e-09	FALSE	FALSE
hsa-miR-625-5p_hsa-mir-625	#N/A	0.007114	FALSE	FALSE
hsa-miR-627-3p_hsa-mir-627	0.3791	0.01071	TRUE	TRUE
hsa-miR-628-3p_hsa-mir-628	0.0005161	0.0165	TRUE	TRUE
hsa-miR-636_hsa-mir-636	0.4766	#N/A	FALSE	FALSE
hsa-miR-641_hsa-mir-641	3.664e-05	0.0001792	TRUE	TRUE
hsa-miR-6501-5p_hsa-mir-6501	#N/A	0.1352	FALSE	FALSE
hsa-miR-6503-3p_hsa-mir-6503	0.4331	0.001375	FALSE	TRUE
hsa-miR-6511a-3p_hsa-mir-6511a-1	0.3272	#N/A	FALSE	FALSE
hsa-miR-6511a-3p_hsa-mir-6511a-2	0.1431	0.04886	FALSE	TRUE
hsa-miR-6511a-3p_hsa-mir-6511a-3	0.06802	0.03351	FALSE	TRUE
hsa-miR-6511a-3p_hsa-mir-6511a-4	0.3711	0.06555	FALSE	TRUE
hsa-miR-6511b-3p_hsa-mir-6511b-1	#N/A	0.0421	FALSE	FALSE
hsa-miR-6511b-3p_hsa-mir-6511b-2	0.02464	#N/A	FALSE	FALSE
hsa-miR-6513-3p_hsa-mir-6513	0.1031	#N/A	FALSE	FALSE
hsa-miR-6514-3p_hsa-mir-6514	#N/A	0.1702	FALSE	FALSE
hsa-miR-654-3p_hsa-mir-654	1.46e-07	0	FALSE	FALSE
hsa-miR-654-5p_hsa-mir-654	0.0008163	3.081e-14	FALSE	FALSE
hsa-miR-664a-3p_hsa-mir-664a	0.1379	#N/A	FALSE	FALSE
hsa-miR-664a-5p_hsa-mir-664a	#N/A	0.02444	FALSE	FALSE
hsa-miR-671-3p_hsa-mir-671	0.3707	0.2332	FALSE	FALSE
hsa-miR-6726-3p_hsa-mir-6726	0.01532	0.3255	FALSE	TRUE
hsa-miR-6734-3p_hsa-mir-6734	0.02558	#N/A	FALSE	FALSE
hsa-miR-6741-3p_hsa-mir-6741	0.007497	#N/A	FALSE	FALSE
hsa-miR-6747-3p_hsa-mir-6747	#N/A	0.1823	FALSE	FALSE
hsa-miR-6775-3p_hsa-mir-6775	0.2388	#N/A	FALSE	FALSE
hsa-miR-6783-3p_hsa-mir-6783	0.4029	0.3297	TRUE	TRUE
hsa-miR-6799-3p_hsa-mir-6799	0.02568	#N/A	FALSE	FALSE
hsa-miR-6802-3p_hsa-mir-6802	0.1728	#N/A	FALSE	FALSE
hsa-miR-6806-3p_hsa-mir-6806	0.01549	0.4651	TRUE	TRUE
hsa-miR-6812-3p_hsa-mir-6812	0.3491	#N/A	FALSE	FALSE
hsa-miR-6833-3p_hsa-mir-6833	0.07477	0.09095	FALSE	TRUE
hsa-miR-6842-3p_hsa-mir-6842	#N/A	0.05463	FALSE	FALSE
hsa-miR-6852-3p_hsa-mir-6852	#N/A	0.2034	FALSE	FALSE
hsa-miR-6852-5p_hsa-mir-6852	0.2459	#N/A	FALSE	FALSE
hsa-miR-6855-3p_hsa-mir-6855	0.018	2.44e-06	FALSE	FALSE
hsa-miR-6859-3p_hsa-mir-6859-2	#N/A	0.04216	FALSE	FALSE
hsa-miR-6859-3p_hsa-mir-6859-3	0.03204	0.495	TRUE	TRUE
hsa-miR-6859-3p_hsa-mir-6859-4	0.03204	0.495	TRUE	TRUE
hsa-miR-6859-5p_hsa-mir-6859-2	#N/A	0.09925	FALSE	FALSE
hsa-miR-6859-5p_hsa-mir-6859-3	0.153	0.4004	FALSE	TRUE
hsa-miR-6859-5p_hsa-mir-6859-4	0.153	0.4004	FALSE	TRUE
hsa-miR-6866-5p_hsa-mir-6866	0.06311	#N/A	FALSE	FALSE
hsa-miR-6868-3p_hsa-mir-6868	0	0	FALSE	FALSE
hsa-miR-6873-3p_hsa-mir-6873	0.2545	0.08866	TRUE	TRUE
hsa-miR-6881-3p_hsa-mir-6881	0.3363	0.02632	TRUE	TRUE
hsa-miR-6885-3p_hsa-mir-6885	0.0522	0.006993	FALSE	TRUE
hsa-miR-7-1-3p_hsa-mir-7-1	0.3325	0.0259	TRUE	TRUE
hsa-miR-7-5p_hsa-mir-7-1	0.09544	0.2893	TRUE	TRUE
hsa-miR-7-5p_hsa-mir-7-2	0.4064	0.2969	FALSE	TRUE
hsa-miR-7-5p_hsa-mir-7-3	0.05766	0.1274	TRUE	TRUE
hsa-miR-744-5p_hsa-mir-744	#N/A	0.1187	FALSE	FALSE
hsa-miR-7706_hsa-mir-7706	0.0121	2.776e-16	FALSE	FALSE
hsa-miR-7855-5p_hsa-mir-7855	#N/A	0.06749	FALSE	FALSE
hsa-miR-7976_hsa-mir-7976	#N/A	0.2114	FALSE	FALSE
hsa-miR-92b-3p_hsa-mir-92b	#N/A	0.07315	FALSE	FALSE
hsa-miR-92b-5p_hsa-mir-92b	0.4165	0.3434	FALSE	TRUE
hsa-miR-93-5p_hsa-mir-93	#N/A	0.2877	FALSE	FALSE
hsa-miR-933_hsa-mir-933	0.4664	#N/A	FALSE	FALSE
hsa-miR-937-3p_hsa-mir-937	0.09947	0.1024	TRUE	TRUE
hsa-miR-939-5p_hsa-mir-939	0.4128	0.2976	TRUE	TRUE
hsa-miR-941_hsa-mir-941-1	8.601e-10	0	FALSE	FALSE
hsa-miR-941_hsa-mir-941-2	8.601e-10	0	FALSE	FALSE
hsa-miR-941_hsa-mir-941-3	8.601e-10	0	FALSE	FALSE
hsa-miR-941_hsa-mir-941-4	8.639e-10	0	FALSE	FALSE
hsa-miR-941_hsa-mir-941-5	8.639e-10	0	FALSE	FALSE
hsa-miR-942-5p_hsa-mir-942	0.1749	0.2447	FALSE	TRUE
hsa-miR-943_hsa-mir-943	#N/A	0.2063	FALSE	FALSE
hsa-miR-96-5p_hsa-mir-96	0.009051	0.1443	TRUE	TRUE
hsa-miR-9903_hsa-mir-9903	#N/A	0.02531	FALSE	FALSE
hsa-miR-99a-5p_hsa-mir-99a	0.1563	1.06e-11	TRUE	TRUE
hsa-miR-99b-5p_hsa-mir-99b	0.1205	6.396e-06	TRUE	TRUE

## Sheet: ST 6
Supplementary Table VI
SNP	Minor Allele frequency	GENOTYPE	Affective	Control	Psychotic	X² p-value	X² Adjusted p-value
rs10951343	C=0.490475/2456 (1000Genomes)	CC	196 (14,9%)	102 (7,7%)	158 (12%)	0.926	0.953
		TC	251 (19,1%)	134 (10,2%)	229 (17,4%)
		TT	101 (7,7%)	55 (4,2%)	91 (6,9%)
rs1823517	C=0.492349/2466 (1000Genomes)	CC	193 (14,7%)	104 (7,9%)	156 (11,8%)	0.707	0.953
		TC	251 (19,1%)	133 (10,1%)	227 (17,2%)
		TT	104 (7,9%)	54 (4,1%)	95 (7,2%)
rs2305496	A=0.217989/1092 (1000Genomes)	AA	2 (0,2%)	2 (0,2%)	5 (0,4%)	0.559	0.953
		AC	111 (8,4%)	64 (4,9%)	89 (6,8%)
		CC	435 (33%)	225 (17,1%)	384 (29,2%)
rs248221	C=0.144441/723 (1000Genomes)	CC	9 (0,7%)	9 (0,7%)	12 (0,9%)	0.586	0.953
		CT	172 (13,1%)	88 (6,7%)	159 (12,1%)
		TT	367 (27,9%)	194 (14,7%)	307 (23,3%)
rs3117002	G=0.116958/586 (1000Genomes)	AA	384 (29,2%)	194 (14,7%)	323 (24,5%)	0.715	0.953
		GA	149 (11,3%)	91 (6,9%)	141 (10,7%)
		GG	15 (1,1%)	6 (0,5%)	14 (1,1%)
rs35767322	A=0.134291/673 (1000Genomes)	AA	27 (2,1%)	20 (1,5%)	28 (2,1%)	0.05	0.619
		AG	212 (16,1%)	94 (7,1%)	148 (11,2%)
		GG	309 (23,5%)	177 (13,4%)	302 (22,9%)
rs6429422	G=0.428326/2145 (1000Genomes)	GG	54 (4,1%)	34 (2,6%)	59 (4,5%)	0.312	0.953
		GT	254 (19,3%)	115 (8,7%)	203 (15,4%)
		TT	240 (18,2%)	142 (10,8%)	216 (16,4%)
rs7290062	C=0.074172/371 (1000Genomes)	CC	16 (1,2%)	7 (0,5%)	16 (1,2%)	0.953	0.953
		CT	131 (9,9%)	72 (5,5%)	112 (8,5%)
		TT	401 (30,4%)	212 (16,1%)	350 (26,6%)

## Sheet: ST 8
Supplementary table VIII: Gene Ontologies
GO.ID	Term	Annotated	Significant	Expected	pval	adjpval	Genes	Enrichment	Condition	cluster
GO:0061158	3'-UTR-mediated mRNA destabilization	10	7	1.52	0.00015	0.00125	CPEB3, ZFP36L1, TARDBP, HNRNPD, ZFP36L2, RC3H1, DHX36	4.71	Intersect	transcription and translation
GO:0032924	activin receptor signaling pathway	24	6	1.64	0.00485	0.02828	TGFBR2, ACVR2A, TGIF2, LEMD3, SMAD3, CITED2	3.69	Affective Only	Intracellular Signaling pathways
GO:1990000	amyloid fibril formation	21	6	1.44	0.00225	0.02828	LDLR, HNRNPA1, USP8, FURIN, MDM2, MAPT	4.22	Affective Only	transcription and translation
GO:0071695	anatomical structure maturation	112	24	16.11	0.00442	0.026	NF1, ZBTB7A, CDK5R1, HIF1A, APP, RBPJ, ANKRD17, EDNRB, RET, CDH5, ARCN1, ABHD2, BRD1, SHB, FZD5, L3MBTL3, RFLNB, TRIP13, MMP2, CX3CR1, BFSP1, CEBPA, RYR1, FARP2	1.52	Psychotic Only	Anatomical Differentiation
GO:0001568	blood vessel development	386	99	58.84	0.00012	0.00125	ACVR1, QKI, KLF4, FBXW7, TGFBR1, RIN2, NFE2L2, COL5A1, VEGFA, TGFA, BMPR2, TCF7L2, EPAS1, RAP1A, ITGAV, MIB1, AGO1, SPRED1, ROCK1, RUNX1, ZFP36L1, SPRY2, ACVR2B, ETS1, NRP2, MIA3, FOXO1, STARD13, SOX4, HIPK1, ELK3, MED1, JAG1, COL1A2, ADM, SMAD7, ADIPOR2, SLC12A2, COL3A1, EDN1, MAPK14, ITGA5, MECP2, PIK3R3, TJP1, MTDH, FN1, MYO1E, PTGS2, SLC12A6, THBS1, VASH1, CNTRL, CLIC4, NUS1, KLF2, CRKL, ROCK…	1.73	Intersect	Anatomical Differentiation
GO:0098703	calcium ion import across plasma membrane	23	6	1.58	0.00372	0.02828	PPP3CA, PPP3R1, SLC8A1, PPP3CC, CACNA1E, SLC24A4	3.85	Affective Only	Neuronal Membrane Transport
GO:0019722	calcium-mediated signaling	95	22	13.66	0.00324	0.026	NCALD, RCAN2, ATP2B4, FHL2, ZMPSTE24, EDNRB, NFATC3, GSK3B, NUDT4, ATP1A2, CAMK2D, NFATC1, EIF2AK3, CXCR4, MAPK7, PDPK1, DMPK, PTBP1, PLCG1, RCAN3, CCR5, CLIC2	1.64	Psychotic Only	Intracellular Signaling pathways
GO:0003230	cardiac atrium development	14	8	2.13	0.00036	0.00211765	ACVR1, IGF1R, BMPR2, SOX4, SOS1, NOTCH2, HEG1, NSD2	3.85	Intersect	Anatomical Differentiation
GO:0045165	cell fate commitment	112	35	17.07	5.1e-06	0.000102	ACVR1, KLF4, TGFBR1, BCL11B, LMO4, TCF7L2, EPAS1, SPRY2, PTCH1, RAB10, JAG1, CASP3, EDN1, PRDM4, GATAD2B, LATS2, MTOR, SMAD5, SMAD2, RUNX2, SOX6, RTF1, MEF2C, CDC73, NOTCH2, APC, SMAD4, KDM6B, BCL2, CHD4, TEAD3, RHOA, GATA2, LATS1, PML	2.10	Intersect	Neurogenesis
GO:0071549	cellular response to dexamethasone stimulus	16	6	1.1	0.00045	0.0225	AXIN2, TFAP4, FBXO32, USP8, EIF4E, AQP1	5.54	Affective Only	Stress response
GO:0071456	cellular response to hypoxia	88	27	13.41	0.00030	0.00211765	EPHA4, NFE2L2, E2F1, PRKCE, CPEB2, CDKN1B, VEGFA, EPAS1, ZFP36L1, FOS, NPEPPS, EDN1, PTGS2, MTOR, PRKAA1, ROCK2, RORA, EGR1, HIPK2, DNMT3A, ERO1A, BCL2, NKX3-1, PDK1, SLC9A1, TIGAR, P4HB	2.07	Intersect	Stress response
GO:1990830	cellular response to leukemia inhibitory factor	69	23	10.52	0.00014	0.00125	KLF4, JARID2, BCAT2, SPRY2, NRP2, SMAD7, RNF138, HNRNPU, PIGA, CREB1, PCOLCE2, GFPT2, ARID5B, NEFH, KLF5, BCLAF1, MTF2, SRSF3, RIF1, SPOCK2, PML, CACYBP, WDR35	2.24	Intersect	Stress response
GO:0038065	collagen-activated signaling pathway	10	7	1.44	0.00010	0.01	COL1A1, COL4A2, DDR2, JAK2, UBASH3B, OSCAR, GP6	4.95	Psychotic Only	Intracellular Signaling pathways
GO:0007010	cytoskeleton organization	830	73	56.89	0.00407	0.02828	ARHGAP12, CLIP1, SIRT1, CHEK1, TSC1, USP33, CFL2, SLAIN1, SMAD3, CRK, KATNBL1, GAB1, ARPC5, RANBP10, MAPRE1, LIMCH1, MID1IP1, CLTC, DPYSL2, CYLD, ZNF207, MYH9, ZMYM4, BICD2, PAWR, KPNB1, FGD6, PIK3CA, SSH1, TTN, PAK6, MAP7D1, RAP2A, CEP135, WASF3, SPIRE1, GRB2, DST, PAK4, ANK1, PLS3, CCDC88A, TNKS, ATXN7, TESK2, TUBGCP3, ARPC5L, IQSEC2, SPTBN2, FKBP4, LLGL2, MYO1C, SWAP70, ABLIM1, TMSB4X, EMP2, O…	1.30	Affective Only	organelle organization
GO:0098935	dendritic transport	12	7	1.83	0.00073	0.00347619	PURA, TRAK2, HNRNPU, KIF5B, WASF1, KIF3B, STAU1	3.93	Intersect	Neuronal Membrane Transport
GO:0016197	endosomal transport	175	19	11.99	0.00596	0.02828	ITSN2, VPS37A, SNX2, EPS15, SNX5, ZFYVE16, CLTC, ZFYVE9, SQSTM1, REPS1, ACAP2, SNX1, GOLT1B, REPS2, ERC1, EHD3, LRRK2, ALS2CL, BET1L	1.60	Affective Only	Neuronal Membrane Transport
GO:0097009	energy homeostasis	25	6	1.71	0.00581	0.02828	STAT3, SIRT1, PIK3CA, SQSTM1, NR1D2, LEPR	3.54	Affective Only	energy homeostasis
GO:0060325	face morphogenesis	21	8	3.02	0.00636	0.0312571	ASPH, SKI, NIPBL, COL1A1, PTPN11, MMP2, RRAS, CRISPLD2	2.69	Psychotic Only	Anatomical Differentiation
GO:0001701	in utero embryonic development	250	60	38.11	0.00062	0.00344444	MAN2A1, ACVR1, TRAF6, KLF4, NDEL1, TGFBR1, BCL2L11, SP3, VEGFA, MBNL1, EPAS1, MIB1, ZFAND5, PHF6, TBL1XR1, TTLL4, ZFP36L1, PTCH1, MED1, ADM, COPS2, CUL3, COL3A1, EDN1, LATS2, NPAT, ADAM10, CDKN1C, SH3PXD2A, MYO1E, VASH1, SMAD2, VPS54, KLF2, CHD7, RTF1, PDGFRA, CUL4A, BIRC6, ELL, ALS2, GNA13, NOTCH2, MAFG, SMAD4, HEG1, OTUD7B, CNOT2, FUT8, SETD2, GATA2, FOXC1, LATS1, NMT1, EPB41L5, KIDINS220, RRP7…	1.62	Intersect	Anatomical Differentiation
GO:0042491	inner ear auditory receptor cell differentiation	16	7	2.3	0.00435	0.026	RBPJ, MYO6, TRIOBP, SLC4A7, NOTCH1, PLS1, CDH23	3.09	Psychotic Only	Anatomical Differentiation
GO:0048009	insulin-like growth factor receptor signaling pathway	30	12	4.31	0.00052	0.013	RAF1, GIGYF2, IRS1, MAPK1, GIGYF1, CILP, EIF2AK3, IGF2R, PDPK1, IGF2, SHC1, IGFBP2	2.83	Psychotic Only	Intracellular Signaling pathways
GO:0097193	intrinsic apoptotic signaling pathway	196	38	29.88	0.00066	0.00347368	FBXW7, NFE2L2, BCL2L11, NACC2, BCL2L2, E2F1, DDIT4, CUL5, SIAH1, SGMS1, DYRK2, HIPK1, CASP3, CUL3, CUL2, PLAGL2, DDX3X, SGPP1, PTGS2, USP28, PPM1F, DAB2IP, STK24, CUL4A, HIPK2, BCLAF1, USP47, ZNF385A, ERO1A, HERPUD1, BCL2, CAV1, NKX3-1, PDK1, CUL1, PML, ABL1, P4HB	1.31	Intersect	Intracellular Signaling pathways
GO:0007595	lactation	23	9	3.31	0.00311	0.026	CCND1, HIF1A, HK2, ATP7A, PAM, SOCS2, NEURL1, UMPS, VDR	2.77	Psychotic Only	Anatomical Differentiation
GO:0036303	lymph vessel morphogenesis	10	7	1.52	0.00015	0.00125	VEGFA, BMPR2, ACVR2B, VASH1, PPP3CB, FOXC1, PKD1	4.71	Intersect	Anatomical Differentiation
GO:0000165	MAPK cascade	409	37	28.03	0.00691	0.02828	MAP3K4, MAP3K9, PPARG, SMAD3, DAB2, CRK, MDFIC, HGF, CYLD, GCNT2, MAP3K5, BCAR3, TRIB1, NLK, PAK6, RAP2A, GRB2, RB1CC1, CAV2, CAMKK2, PPP5C, PAK4, SPRED2, YWHAE, DUSP16, PABPN1, PDE8A, LIF, GLIPR2, DNAJC27, MAPKBP1, TRAF1, BTN2A2, AVPI1, LRRK2, PINK1, PLVAP	1.34	Affective Only	Intracellular Signaling pathways
GO:0072330	monocarboxylic acid biosynthetic process	95	15	13.66	0.00376	0.026	OSBPL9, ELOVL5, PER2, INSIG1, RDH10, LPL, ABHD2, SCP2, CHST14, PRMT3, DCAF5, ALDH8A1, SCAP, OSBPL2, CHST12	1.12	Psychotic Only	monocarboxylic acid biosynthetic process
GO:1902430	negative regulation of amyloid-beta formation	12	6	1.73	0.00371	0.026	SORL1, RTN2, GGA3, RTN1, RTN3, SPON1	3.54	Psychotic Only	transcription and translation
GO:0030308	negative regulation of cell growth	109	14	7.47	0.00325	0.02828	SERPINE2, SIRT1, BTG1, CAPRIN2, RBBP7, DCUN1D3, SMAD3, DAB2, VGLL4, RB1, SERTAD3, ADIPOR1, NAIF1, SLIT1	1.90	Affective Only	regulation of cellular components
GO:0031327	negative regulation of cellular biosynthetic process	913	127	131.29	0.00633	0.0312571	DCP2, ZBTB7A, CDK5R1, CTCF, CCND1, PID1, GIGYF2, BMI1, MIER3, CDKN1A, PRDM1, PPM1A, ZBTB2, JAZF1, RNF2, TSHZ3, SDCBP, RAPGEF2, PER2, SKI, KMT5A, HMBOX1, ZBTB5, ATP2B4, TBL1X, MNT, FHL2, SOX12, PLAGL1, CBX7, RBPJ, LARP1, INSIG1, KAT6A, E2F6, SCAF8, CELF1, EDNRB, NFATC3, CDYL, IL10, JUN, ZBTB38, HDAC4, BCORL1, TFEC, ZNF827, HNRNPA2B1, GSK3B, ZNF268, NIPBL, HMG20A, WWC3, EIF4A2, YTHDF3, SIRPA, TAF9B…	0.98	Psychotic Only	transcription and translation
GO:0045892	negative regulation of DNA-templated transcription	739	177	112.65	3.6e-06	9e-05	BACH1, TRAF6, ARID4B, KLF4, ZEB1, DICER1, ZHX1, UBE2D1, RYBP, ARID4A, MEF2A, ESR1, ZEB2, FNIP1, CREBZF, ZMYND11, SATB1, NACC2, BTRC, NFIB, RPS6KA5, E2F1, JARID2, CPEB3, CDKN1B, MAF, PURA, SP3, BTG2, LMO4, NR4A3, PPARGC1B, VEGFA, THAP1, TCF7L2, ZBTB18, MIER1, ZBTB34, FBXW11, BACH2, ATXN1, ZNF512B, KDM2A, PHF6, TBL1XR1, TGIF1, RUNX1, RREB1, ACVR2B, MXD1, NEDD4, CLOCK, CBFB, LCOR, CNOT7, FOXO3, KLF3…	1.61	Intersect	transcription and translation
GO:1904036	negative regulation of epithelial cell apoptotic process	29	11	4.42	0.00036	0.00211765	NFE2L2, IGF1R, CDKN1B, TCF7L2, TMF1, PRKAA1, BCL2, GATA2, ADAR, ABL1, PPARA	2.55	Intersect	Stress response
GO:0051346	negative regulation of hydrolase activity	152	29	21.86	0.00628	0.0312571	RAF1, GNAI2, APP, SPRY1, SORL1, AMOT, RPS6KA1, GSK3B, FKBP1A, EGLN1, TMED10, SIAH2, BICD1, MAPK7, SLC39A14, SERPINE1, PPP1R11, ANGPTL4, RFFL, TMBIM6, TIMP2, DHCR24, CARD8, SRC, SERPINH1, PRKCZ, SERPINA1, CPAMD8, SPHK2	1.35	Psychotic Only	negative regulation of hydrolase activity
GO:1903202	negative regulation of oxidative stress-induced cell death	29	7	1.99	0.00285	0.02828	SIRT1, TSC1, HGF, PDE8A, NONO, LRRK2, PINK1	3.56	Affective Only	Stress response
GO:0031333	negative regulation of protein-containing complex assembly	90	20	12.94	0.00035	0.012	RAF1, PPM1A, ANKRD27, ULK1, SORL1, TRIOBP, MAP2, CSNK1A1, CDH5, ZNF827, GSK3B, STXBP1, SMAD6, HMGB1, PRRT2, MTPN, SVIL, CARD8, SRC, PRKCZ	1.57	Psychotic Only	regulation of cellular components
GO:0000122	negative regulation of transcription by RNA polymerase II	547	58	37.49	0.00083	0.0276667	MYB, STAT3, ZNF217, NR2F2, SIRT1, MITF, EED, MDM4, ZBTB4, TGIF2, RBBP7, E2F8, PPARG, SMAD3, DAB2, WDTC1, NR6A1, ZBTB39, HOXB3, ZHX2, TLE4, UBE2D3, ZBTB21, RB1, KLF11, SAP30L, PAWR, ZFHX3, CITED2, ZNF3, SQSTM1, TCERG1, MXI1, BHLHE40, CTNNBIP1, KDM5A, ZNF608, UBE2I, GATA3, HIF1AN, EP300, CCND3, NRIP1, NR1D2, NACC1, CBX5, MDM2, CHD8, TFCP2L1, ETV5, HIC1, ZNF436, ZBTB20, CC2D1A, RELA, DNAJB1, DNAJA3,…	1.57	Affective Only	transcription and translation
GO:0000122	negative regulation of transcription by RNA polymerase II	547	126	83.38	4.0e-07	1.33333e-05	BACH1, TRAF6, ARID4B, KLF4, ZEB1, DICER1, ZHX1, UBE2D1, RYBP, ARID4A, MEF2A, ESR1, ZEB2, FNIP1, SATB1, NACC2, E2F1, JARID2, CPEB3, MAF, PURA, SP3, BTG2, LMO4, NR4A3, VEGFA, THAP1, TCF7L2, ZBTB18, MIER1, ZBTB34, BACH2, ATXN1, ZNF512B, PHF6, TBL1XR1, TGIF1, RUNX1, RREB1, ACVR2B, MXD1, NEDD4, CBFB, LCOR, FOXO3, KLF3, WWC2, PTCH1, HIC2, FOXO1, ELK3, MED1, SMAD7, HNRNPU, COPS2, CUL3, EDN1, SNCA, GATAD…	1.55	Intersect	transcription and translation
GO:0006998	nuclear envelope organization	45	12	6.47	0.00108	0.0216	CHMP2B, REEP3, SUN2, UBXN2B, ZMPSTE24, LMNB1, PRKCA, NEMP1, DMPK, LMNB2, CHMP7, LEMD2	1.89	Psychotic Only	organelle organization
GO:0060037	pharyngeal system development	11	8	1.68	3.1e-05	0.000442857	ACVR1, TGFBR1, BMPR2, PTCH1, EDN1, ECE1, PLXNA2, NKX3-1	4.90	Intersect	Anatomical Differentiation
GO:0044794	positive regulation by host of viral process	16	7	2.3	0.00435	0.026	PC, TBC1D20, ZDHHC20, NUCKS1, IGF2R, ZDHHC9, ZDHHC8	3.09	Psychotic Only	positive regulation by host of viral process
GO:0045807	positive regulation of endocytosis	57	9	3.91	0.00707	0.02828	PPP3CA, DAB2, CBLL1, HNRNPK, ATAD1, CD151, PPP3CC, LRRK2, RAB31	2.33	Affective Only	Neurogenesis
GO:0010718	positive regulation of epithelial to mesenchymal transition	37	8	2.54	0.00303	0.02828	TGFBR2, AXIN2, SMAD3, DAB2, GCNT2, BCL9L, GLIPR2, EMP2	3.19	Affective Only	Neurogenesis
GO:0031065	positive regulation of histone deacetylation	18	5	1.23	0.00602	0.02828	SMARCA5, SIRT1, BAZ2A, LRRK2, PINK1	4.10	Affective Only	transcription and translation
GO:0046628	positive regulation of insulin receptor signaling pathway	18	9	2.59	0.00036	0.012	IRS1, GNAI2, SORL1, NUCKS1, SORBS1, PTPN11, IGF2, SRC, PRKCZ	3.54	Psychotic Only	Intracellular Signaling pathways
GO:0002052	positive regulation of neuroblast proliferation	11	6	1.58	0.00211	0.026	HIF1A, FZD3, DISC1, NOTCH1, CX3CR1, ZNF335	3.86	Psychotic Only	Neurogenesis
GO:1900153	positive regulation of nuclear-transcribed mRNA catabolic process, deadenylation-dependent decay	11	7	1.68	0.00035	0.00211765	CPEB3, ZFP36L1, CNOT7, TNRC6B, TOB1, ZFP36L2, DHX36	4.28	Intersect	transcription and translation
GO:2000758	positive regulation of peptidyl-lysine acetylation	26	6	3.96	8.2e-05	0.001025	SOX4, DIP2B, PRKAA1, SMAD4, DIP2A, PML	1.55	Intersect	transcription and translation
GO:0051047	positive regulation of secretion	164	20	11.24	0.00316	0.02828	PPP3CA, ITPR1, RAB5A, ACSL3, SEC24A, PPARG, DAB2, SNX5, SDC1, ACSL4, IER3IP1, TTN, APBB3, WLS, C2CD2L, GAB2, GLUL, AQP1, CD177, PINK1	1.80	Affective Only	Neuronal Membrane Transport
GO:0045944	positive regulation of transcription by RNA polymerase II	694	157	105.79	7.9e-08	7.9e-06	MYBL1, BACH1, ACVR1, TRAF6, PBX3, ARID4B, KLF4, AKIRIN1, ZEB1, PLAG1, NFE2L2, CCNT2, ARID4A, MEF2A, ESR1, ZEB2, BCL11B, CREBZF, RPS6KA3, ZFX, RHOQ, NFIB, MTF1, RPS6KA5, E2F1, SS18, LRP6, CREBRF, MAF, SP3, ASH1L, DCAF6, NR4A3, KPNA6, PPARGC1B, VEGFA, TCF12, BMPR2, TCF7L2, ZBTB18, ARID3B, EPAS1, AGO1, TBL1XR1, MED12L, MLLT10, RUNX1, NFIA, RREB1, CLOCK, CBFB, CNOT7, FOXO3, FOS, ETS1, KAT2B, FOXO1, S…	1.52	Intersect	transcription and translation
GO:0009791	post-embryonic development	62	26	9.45	3.6e-07	1.33333e-05	KLF4, TGFBR1, BCL2L11, BCL11B, SERP1, MORC3, FBN1, ASH1L, VEGFA, PLEKHA1, ACVR2B, IREB2, PLAGL2, ATRX, MECP2, KMT2A, MYO1E, MTOR, SMAD2, VPS54, ARID5B, SLC4A10, SEMA3C, HEG1, BCL2, ABL1	2.82	Intersect	Anatomical Differentiation
GO:0003177	pulmonary valve development	11	6	1.58	0.00211	0.026	RBPJ, TNFRSF1B, NFATC1, SMAD6, TNFRSF1A, NOTCH1	3.86	Psychotic Only	Anatomical Differentiation
GO:0006898	receptor-mediated endocytosis	153	24	10.49	9.5e-05	0.0095	VLDLR, TGFBR2, ITSN2, PPP3R1, LDLR, RAB5A, EPS15, LMBR1L, DAB2, SMAP1, SDC1, CLTC, GRB2, CAV2, HNRNPK, SNX1, GRK3, ATAD1, M6PR, OPHN1, SCARB2, PDLIM7, SIGLEC1, RAB31	2.32	Affective Only	Neuronal Membrane Transport
GO:0048814	regulation of dendrite morphogenesis	37	7	2.54	0.00598	0.02828	PPP3CA, YWHAH, CAPRIN2, SDC2, LRP8, RAP2A, SARM1	2.79	Affective Only	Neurogenesis
GO:0005979	regulation of glycogen biosynthetic process	15	7	2.16	0.00279	0.026	IRS1, GSK3B, EPM2AIP1, SORBS1, PPP1R3D, INPP5K, IGF2	3.30	Psychotic Only	transcription and translation
GO:1903205	regulation of hydrogen peroxide-induced cell death	14	5	0.96	0.00177	0.02828	HGF, PAWR, PDE8A, LRRK2, PINK1	5.27	Affective Only	Stress response
GO:0019216	regulation of lipid metabolic process	192	15	13.16	0.00783	0.0301154	MTMR9, SIRT1, LDLR, ACSL3, PPARG, DAB2, WDTC1, MID1IP1, PSAP, ADIPOR1, NR1D2, CPT1A, ZBTB20, DNAJC15, ANXA1	1.15	Affective Only	regulation of lipid metabolic process
GO:0090025	regulation of monocyte chemotaxis	12	6	1.73	0.00371	0.026	CXCL12, HMGB1, SERPINE1, NBL1, MOSPD2, CX3CR1	3.54	Psychotic Only	regulation of monocyte chemotaxis
GO:0032228	regulation of synaptic transmission, GABAergic	16	9	2.44	0.00018	0.00138462	KRAS, PRKCE, USP46, PLCL2, KIF5B, CNR1, SLC38A1, ZDHHC3, PLCL1	3.79	Intersect	Intracellular Signaling pathways
GO:0001501	skeletal system development	247	62	37.65	2.9e-05	0.000442857	PAFAH1B1, FBXW7, ZEB1, TGFBR1, RPS6KA3, NFIB, MBTD1, SERP1, GJA1, MAF, SP3, FBN1, ASH1L, PIP4K2A, PPARGC1B, BMPR2, COL5A2, PLEKHA1, ZFAND5, ACVR2B, FBN2, SOX4, FOXP1, MED1, COL1A2, SMAD7, FOXN3, COL3A1, EDN1, MAPK14, NAB1, CDKN1C, XYLT1, SMAD5, SMAD2, RUNX2, ARID5B, SOX6, CHD7, PDGFRA, PUM2, MEF2D, USP1, TRPS1, NDST1, MEF2C, ZNF385A, ATG9A, ANKRD11, NOTCH2, SH2B3, NSD2, RASSF2, SETD2, RHOA, FOXC1…	1.69	Intersect	Anatomical Differentiation
GO:0043149	stress fiber assembly	77	14	11.07	0.00212	0.026	CD47, TNFAIP1, FAM171A1, PPFIA1, ASAP3, SORBS1, SRF, SDC4, INPP5K, NF2, ELN, RAPGEF3, SRC, TESK1	1.29	Psychotic Only	organelle organization
GO:0006511	ubiquitin-dependent protein catabolic process	460	39	31.53	0.00506	0.02828	AXIN2, KLHL42, USP25, SIRT1, USP48, USP33, VPS37A, RAD23B, TRIM2, DAB2, UBE2D2, KLHL3, USP42, GNA12, UBE2D3, CYLD, SKP1, SQSTM1, FBXO10, TRIB1, FAF2, UBE2I, DERL1, PPP2R5C, TP53INP2, USP37, SMARCC1, KCTD17, TRIM9, USP8, RNF14, RNF216, MDM2, FBXO44, HERC3, RNF168, TRIM39, LRRK2, PINK1	1.25	Affective Only	transcription and translation

## Sheet: ST 9
Supplementary Table IX		miRNPS table
seq_ID	refseq	symbol	strand	microRNA_name	miRNA_seq	mutid	mutchr	mutstrand	mutloc	mutobserve	mutgap	mRNA_seq_display	Target.Gene
L2-1575630_1	NM_000291	PGK1	+	hsa-miR-324-5p	CGCATCCCCTAGGGCATTGGTGT	rs11541574	chrX	+	77372855	C/G	3	tttCCAAgCTAGGGGATGTctatgtcaatgatgcttttggcactgc	psychotic
L2-1575630_1	NM_000291	PGK1	+	hsa-miR-324-5p	CGCATCCCCTAGGGCATTGGTGT	rs137852532	chrX	+	77372864	G/T	12	tttCCAAgCTAGGGGATGTctatgtcaatgatgcttttggcactgc	psychotic
L2HS-1083765_2	NM_001001664	SPOPL	+	hsa-miR-324-5p	CGCATCCCCTAGGGCATTGGTGT	rs146687591	chr2	+	139327782	A/G	1	TACTTGCCTTtGGGaGATGCatacaaaaggagagaacccttagac	intersect
L2HS-486792_3	NM_001007561	IRGQ	-	hsa-miR-423-3p	AGCTCGGTCTGAGGCCCCTCAGT	rs114704264	chr19	+	44089421	C/T	6	CAGAgCGAGacttctctcaaaaaaaaaaaaccaaagtgcttatgcac	psychotic
L2-781435_1	NM_001013	RPS9	+	hsa-miR-423-5p	TGAGGGGCAGAGAGCGAGACTTT	rs11544023	chr19	+	54711337	C/T	7	gaCTTCTCTCTGCgCTCTCcctacgggggtggccgcccgggccgcg	affective
L2-781435_1	NM_001013	RPS9	+	hsa-miR-423-5p	TGAGGGGCAGAGAGCGAGACTTT	rs14642	chr19	+	54711339	C/T	9	gaCTTCTCTCTGCgCTCTCcctacgggggtggccgcccgggccgcg	affective
L2HS-2698654_1	NM_001037131	AGAP1	+	hsa-miR-324-5p	CGCATCCCCTAGGGCATTGGTGT	rs184302166	chr2	+	237033785	A/G	28	tatttgatgtCCtttTGCCgAGGtGGATGTGttagtctcaggccctcctggaccacgt	intersect
L2-1378775_1	NM_001077489	GNAS	+	hsa-miR-320b	AAAAGCTGGGTTGAGAGGGCAA	rs15054	chr20	+	57486116	A/C	11	aaaagttCCCTCTCActTTCAGTaaaaataaataaaacagcagcag	intersect
L2HS-1409352_2	NM_001080950	MYO1C	-	hsa-miR-324-5p	CGCATCCCCTAGGGCATTGGTGT	rs150948604	chr17	+	1373945	A/G	34	aaagatCCAAgcTGCCTggAGGGGctttcactgGCGgcagaaattcctcc	affective
L2HS-930560_2	NM_001085366	ZNF655	+	hsa-miR-423-5p	TGAGGGGCAGAGAGCGAGACTTT	rs3823648	chr7	-	99161944	A/G	10	gtgAAAcTTaTGCTgtgTGCCCCTCcttttatgtggcgaacacaacctgccccgtatggtgcctaa	psychotic
L2HS-3786747_1	NM_001113239	HIPK2	-	hsa-miR-423-5p	TGAGGGGCAGAGAGCGAGACTTT	rs4074826	chr7	-	139415943	C/T	26	aagcaaaacAAGTTTaGCcccTTGCCCCTCAaatacattcgcccagttctccagcaggt	intersect
L2HS-1530768_1	NM_001145354	MKLN1	+	hsa-miR-324-5p	CGCATCCCCTAGGGCATTGGTGT	rs201099688	chr7	+	131082039	C/G	13	ttcCACTctTGTCCTGGGGAcccaGCtttaactttagcatctggtatg	intersect
TAON-2773297-1_1	NM_001186	BACH1	+	hsa-miR-769-5p	TGAGACCTCTGGGTTCTGAGCT	rs185275351	chr21	+	30699421	C/G	12	aaagatGGCTCAGAACagatctcaCAGAaacGGTCTgagtgtccgtggttaggtatcaggattagtga	intersect
L1HS-1296277_1	NM_001244698	ZFP36L1	-	hsa-miR-423-5p	TGAGGGGCAGAGAGCGAGACTTT	rs141102986	chr14	+	69256225	G/T	6	cTCcTGCctaCTCcaGCCCCTaccctgcacccacatcccatacc	intersect
L2HS-1589359_1	NM_001417	EIF4B	+	hsa-miR-423-3p	AGCTCGGTCTGAGGCCCCTCAGT	rs188254368	chr12	+	53412625	A/G	10	tgtatAGGGcGCCTCcaattGACCGttccatccttcccactgctccacgGGCTgctc	psychotic
L2-781432_1	NM_001759	CCND2	+	hsa-miR-423-5p	TGAGGGGCAGAGAGCGAGACTTT	rs140753367	chr12	+	4412538	G/T	11	tttgttccaGAGgaGCTCTCCCCCTTggatttgaacttgctctttttgt	intersect
L2HS-1083751_2	NM_001918	DBT	-	hsa-miR-324-5p	CGCATCCCCTAGGGCATTGGTGT	rs200503541	chr1	+	100696335	A/G	6	tatTGCCTatgtGGGGAaGCcattagtagacatagaaacggaagc	psychotic
L2HS-2151061_1	NM_002136	HNRNPA1	+	hsa-miR-324-5p	CGCATCCCCTAGGGCATTGGTGT	rs11554077	chr12	+	54675596	C/T	17	gtaatgagagatccaaACACCAAgcGCTCcAGGGGcttTGggtttgtcacatatgccactgtgg	affective
L1HS-409251_3	NM_002383	MAZ	+	hsa-miR-324-5p	CGCATCCCCTAGGGCATTGGTGT	rs201498662	chr16	+	29819027	C/T	16	cggacgagaagcccTACCAGTGCCCGGtGTGCcagcagcgcttcaagcgcaaggaccgcat	psychotic
L2-1612352_1	NM_002383	MAZ	+	hsa-miR-326	CCTCTGGGCCCTTCCTCCAG	rs116687647	chr16	+	29822288	A/G	23	tagaggtgcttcCTGGGGGcGGGGGaatgcagCCAGtgtccccctcc	psychotic
L2HS-3456195_1	NM_002435	MPI	+	hsa-miR-324-5p	CGCATCCCCTAGGGCATTGGTGT	rs201815588	chr15	+	75189977	C/G	24	agACACCAATCCCTctgcaacgtGGtGGcGTGCtcttcattggggccaatgagagtgtctcactgaagctta	psychotic
L2HS-2698738_1	NM_002635	SLC25A3	+	hsa-miR-324-5p	CGCATCCCCTAGGGCATTGGTGT	rs147351479	chr12	+	98992442	A/T	19	tatGCCAAcaCTTTGaGGGATGCagctcccaaaatgtataaggaagaaggcc	psychotic
L2HS-2698738_1	NM_002635	SLC25A3	+	hsa-miR-324-5p	CGCATCCCCTAGGGCATTGGTGT	rs113045059	chr12	+	98992435	C/T	12	tatGCCAAcaCTTTGaGGGATGCagctcccaaaatgtataaggaagaaggcc	psychotic
L2HS-2747553_1	NM_004393	DAG1	+	hsa-miR-423-5p	TGAGGGGCAGAGAGCGAGACTTT	rs199501149	chr3	+	49547990	C/T	5	ccTCTCGCTgCTgCTGCCCCTCtcggggaggacctttctcctcctgctctctgtggttatggctcagtcccactg	intersect
L2HS-2747553_1	NM_004393	DAG1	+	hsa-miR-423-5p	TGAGGGGCAGAGAGCGAGACTTT	rs62261246	chr3	+	49548006	C/G	21	ccTCTCGCTgCTgCTGCCCCTCtcggggaggacctttctcctcctgctctctgtggttatggctcagtcccactg	intersect
L2-1575672_1	NM_004924	ACTN4	+	hsa-miR-324-5p	CGCATCCCCTAGGGCATTGGTGT	rs35588423	chr19	+	39220381	-/T	24	cccacagcacaACCGgtcccttccATGCCCTGGGATGCctcaccacacccaggtctcttcctttgc	intersect
L2-1575672_1	NM_004924	ACTN4	+	hsa-miR-324-5p	CGCATCCCCTAGGGCATTGGTGT	rs116093917	chr19	+	39220389	G/T	32	cccacagcacaACCGgtcccttccATGCCCTGGGATGCctcaccacacccaggtctcttcctttgc	intersect
L2HS-1031691_2	NM_005063	SCD	+	hsa-miR-324-5p	CGCATCCCCTAGGGCATTGGTGT	rs201769718	chr10	+	102116333	C/T	14	cttcatcctgcccACGCTtGTGCCCTGGtatttctGGGGTGaaacttttcaaaa	intersect
L2HS-1031691_2	NM_005063	SCD	+	hsa-miR-324-5p	CGCATCCCCTAGGGCATTGGTGT	rs200503958	chr10	+	102116334	A/G	15	cttcatcctgcccACGCTtGTGCCCTGGtatttctGGGGTGaaacttttcaaaa	intersect
L2HS-1338835_2	NM_005688	ABCC5	-	hsa-miR-423-5p	TGAGGGGCAGAGAGCGAGACTTT	rs184559648	chr3	+	183637998	C/T	33	tcccctcAAAGTCTgcaactttaagcaGCTCTTGCTaaTCAgtgtc	intersect
L2-2093393_1	NM_006267	RANBP2	+	hsa-miR-423-3p	AGCTCGGTCTGAGGCCCCTCAGT	rs138272224	chr2	+	109335951	C/G	13	acAGtGGtCCTCcGCCGGCTacggcgctgcgtcactggtttgcag	intersect
L2-276830_2	NM_006312	NCOR2	-	hsa-miR-2110	TTGGGGAAACGGCCGCTGAGTG	rs201769852	chr12	+	124826544	A/G	5	aTCcGCGGCTaCCCCGAcacggcggcgctggagaaccggcagaccatc	intersect
L1-168932_3	NM_012426	SF3B3	+	hsa-miR-423-5p	TGAGGGGCAGAGAGCGAGACTTT	rs77441763	chr16	+	70605851	C/G	29	ttaagactgcattatgAAAGTCaacaGCTCTTTCCCCTCAgctcttctcctggaatgactggcttcccctca	psychotic
L2-1329781_1	NM_013321	SNX8	-	hsa-miR-423-5p	TGAGGGGCAGAGAGCGAGACTTT	rs201796126	chr7	+	2296569	C/G	13	tccacGTCTacCTGCCCCTCAcctcccacatcctccgcgccttcgtc	intersect
TAON-3920839-1_1	NM_013382	POMT2	-	hsa-miR-146b-5p	TGAGAACTGAATTCCATAGGCT	rs11547793	chr14	+	77741394	C/T	19	gatgttcgtcAGCCAATTCAacCTCcagccagcttcttgagcc	intersect
L2-2393879_1	NM_014252	SLC25A15	+	hsa-miR-423-3p	AGCTCGGTCTGAGGCCCCTCAGT	rs144656633	chr13	+	41373276	C/T	22	gttccctgacCTGtaccGGGGCCTCAccGACTGctGCctgaaga	psychotic
L2-2393879_1	NM_014252	SLC25A15	+	hsa-miR-423-3p	AGCTCGGTCTGAGGCCCCTCAGT	rs187685447	chr13	+	41373284	C/G	30	gttccctgacCTGtaccGGGGCCTCAccGACTGctGCctgaaga	psychotic
L2-2393879_1	NM_014252	SLC25A15	+	hsa-miR-423-3p	AGCTCGGTCTGAGGCCCCTCAGT	rs201647638	chr13	+	41373271	A/G	17	gttccctgacCTGtaccGGGGCCTCAccGACTGctGCctgaaga	psychotic
L2HS-1332857_2	NM_015231	NUP160	-	hsa-miR-324-5p	CGCATCCCCTAGGGCATTGGTGT	rs199553535	chr11	+	47861433	C/G	17	ACCatGTGCTtCTGGGGGAatctttgttcttaagctacctccttatgaca	intersect
L2HS-1725232_1	NM_015310	PSD3	-	hsa-miR-326	CCTCTGGGCCCTTCCTCCAG	rs200461260	chr8	+	18729665	C/T	6	aatgGGAGGAaaGGGGCTgtctgtgtgcaggagccatcttgtc	intersect
L2-1499447_1	NM_015549	PLEKHG3	+	hsa-miR-339-5p	TCCCTGTCCTCCAGGAGCTCACG	rs143041330	chr14	+	65208123	A/G	34	cGTGGCacaGGAGGACAgcaagtccagtggctttGGGAgcccgcggct	psychotic
L2HS-1690106_1	NM_017842	SLC48A1	+	hsa-miR-423-5p	TGAGGGGCAGAGAGCGAGACTTT	rs10683	chr12	+	48175390	C/T	15	tgatgtgtcctgcccCTCaGCTCTTTGCCTTatctgtgtcactgtcac	affective
L2-1228614_1	NM_018027	FRMD4A	-	hsa-miR-423-3p	AGCTCGGTCTGAGGCCCCTCAGT	rs146505962	chr10	+	13688008	C/T	13	AGGGGgTTCAGCCGAGCccaagactcaaagctgctttcctttca	psychotic
L2-1228614_1	NM_018027	FRMD4A	-	hsa-miR-423-3p	AGCTCGGTCTGAGGCCCCTCAGT	rs76397645	chr10	+	13688019	C/T	2	AGGGGgTTCAGCCGAGCccaagactcaaagctgctttcctttca	psychotic
0727AHS-704183_2	NM_018067	MAP7D1	+	hsa-miR-320b	AAAAGCTGGGTTGAGAGGGCAA	rs145261276	chr1	+	36646082	-/TTCT	7	acatcCCTTCTCcCCCAtacacacatatacactcacagcctctc	affective
L2HS-644578_3	NM_018292	QRSL1	+	hsa-miR-769-5p	TGAGACCTCTGGGTTCTGAGCT	rs201077509	chr6	+	107100175	C/T	14	atGGCTTAGtttCCCGtcatGGTCTCAttcccctggtgaattcgatggatgtgcca	intersect
L2-1082236_1	NM_018704	CTTNBP2NL	+	hsa-miR-324-5p	CGCATCCCCTAGGGCATTGGTGT	rs140145336	chr1	+	112999294	G/T	7	GTGTCCTGtGGGGATtgagactccagtcccaatgcccagtcccctctct	psychotic
L2HS-1043599_2	NM_020170	NCLN	+	hsa-miR-769-5p	TGAGACCTCTGGGTTCTGAGCT	rs185225134	chr19	+	3208263	G/T	14	tGTTCCCCAtgtGGTCTCAgtgacccgtccccctgacagtgggctc	intersect
L1HS-709531_2	NM_020342	SLC39A10	+	hsa-miR-324-5p	CGCATCCCCTAGGGCATTGGTGT	rs199784501	chr2	+	196581695	C/T	24	aGCCTggatggtgatcaTGGGGGATGgcatccacaacttcagtgatgggctcgcaat	intersect
L2-1355651_1	NM_020452	ATP8B2	+	hsa-miR-423-3p	AGCTCGGTCTGAGGCCCCTCAGT	rs187527774	chr1	+	154322042	C/T	15	gacCTGcAGGGGCCTCGGCCcctcacatcgtgtatgtctctccttg	psychotic
L2-2093341_1	NM_020738	KIDINS220	-	hsa-miR-423-3p	AGCTCGGTCTGAGGCCCCTCAGT	rs143284260	chr2	+	8870227	C/T	4	TGAcGGGGCTgtcCTGAGCTgttaggagagtagatgcggggaggg	intersect
L2-2053595_1	NM_021090	MTMR3	+	hsa-miR-423-5p	TGAGGGGCAGAGAGCGAGACTTT	rs149003322	chr22	+	30416131	C/T	19	acctcacAGTCaTGTTCTCTGCTaCCTTcccaagtcccttttgagaccagaggaccaaacgtggac	intersect
TA1-2808789-1_1	NM_022900	CASD1	+	hsa-miR-140-5p	CAGTGGTTTTACCCTATGGTAG	rs141411174	chr7	+	94139440	A/G	27	acaACCtGGGcAAgcgggagatcAACCACTacttcagcgtgaggagcgccaaggtgctg	intersect
TA1-2808789-1_1	NM_022900	CASD1	+	hsa-miR-140-5p	CAGTGGTTTTACCCTATGGTAG	rs140764569	chr7	+	94139439	C/G	26	acaACCtGGGcAAgcgggagatcAACCACTacttcagcgtgaggagcgccaaggtgctg	intersect
L2-1437256_1	NM_130436	DYRK1A	+	hsa-miR-324-5p	CGCATCCCCTAGGGCATTGGTGT	rs1049787	chr21	+	38862571	C/T	14	ctgagaaACACCAATtTCCgAGGGGtctctttgaacctaacacgaaagtttg	intersect
0727AHS-1265061_1	NM_152230	IPMK	-	hsa-miR-339-5p	TCCCTGTCCTCCAGGAGCTCACG	rs111364576	chr10	+	59954686	C/T	15	aatTTCaTGGGGACAGGGGcagtgctacagttcctggaaaaatta	psychotic
L2-2229750_1	NM_182557	BCL9L	-	hsa-miR-320b	AAAAGCTGGGTTGAGAGGGCAA	rs694769	chr11	-	118768430	G/T	24	cccttccccccttcttcaagttaTTGCTCcCTCcattCCCctgg	affective
L1HS-717545_2	NM_201413	APP	-	hsa-miR-423-3p	AGCTCGGTCTGAGGCCCCTCAGT	rs202074408	chr21	+	27372467	A/G	9	aGAcGGGGCCgtGCCGAGCaatgatctcccgctggtactttgatgtgactgaagggaagtgt	psychotic
L2HS-703983_3	NM_207012	AP3M1	-	hsa-miR-423-5p	TGAGGGGCAGAGAGCGAGACTTT	rs149869240	chr10	+	75881768	C/T	7	ttgcTTTGCTTTCTGCTgaatccctaaTCTCAacaatctatacctggactgtccagttc	psychotic
L2-1575630_1	NM_000291	PGK1	+	hsa-miR-324-5p	CGCATCCCCTAGGGCATTGGTGT	rs185071030	chrX	+	77372879	A/G	27	tttCCAAgCTAGGGGATGTctatgtcaatgatgcttttggcactgc	psychotic
L2-1575630_1	NM_000291	PGK1	+	hsa-miR-324-5p	CGCATCCCCTAGGGCATTGGTGT	rs137852538	chrX	+	77372882	A/T	30	tttCCAAgCTAGGGGATGTctatgtcaatgatgcttttggcactgc	psychotic
L2-1575630_1	NM_000291	PGK1	+	hsa-miR-324-5p	CGCATCCCCTAGGGCATTGGTGT	rs201708335	chrX	+	77372877	C/G	25	tttCCAAgCTAGGGGATGTctatgtcaatgatgcttttggcactgc	psychotic
L2HS-3770717_1	NM_000876	IGF2R	+	hsa-miR-423-3p	AGCTCGGTCTGAGGCCCCTCAGT	rs629849	chr6	+	160494409	A/G	18	gtgtgcaggcCTGAGGccaGGCCaaccaaTAGGCCcatGCTca	psychotic
L2HS-3770717_1	NM_000876	IGF2R	+	hsa-miR-423-3p	AGCTCGGTCTGAGGCCCCTCAGT	rs56029582	chr6	+	160494432	C/T	41	gtgtgcaggcCTGAGGccaGGCCaaccaaTAGGCCcatGCTca	psychotic
L2HS-3591844_1	NM_000917	P4HA1	-	hsa-miR-941	CACCCGGCTGTGTGCACATGTGC	rs202093149	chr10	+	74767159	C/G	30	cTGCTACAGCaGGGTGgtaatattggcattctgattaaatactgtgccttaggag	psychotic
L2HS-3591844_1	NM_000917	P4HA1	-	hsa-miR-941	CACCCGGCTGTGTGCACATGTGC	rs201218494	chr10	+	74767140	A/G	49	cTGCTACAGCaGGGTGgtaatattggcattctgattaaatactgtgccttaggag	psychotic
L1HS-1069001_1	NM_001007466	TULP4	+	hsa-miR-28-5p	AAGGAGCTCACAGTCTATTGAG	rs199591747	chr6	+	158923433	C/T	49	gtggaggaggtgtgccggccccgcacccGGATgcTGtGCTCCcagaacacgtacaccctccccggcccgggtagc	intersect
L1HS-1069001_1	NM_001007466	TULP4	+	hsa-miR-28-5p	AAGGAGCTCACAGTCTATTGAG	rs61743868	chr6	+	158923446	C/T	62	gtggaggaggtgtgccggccccgcacccGGATgcTGtGCTCCcagaacacgtacaccctccccggcccgggtagc	intersect
L1HS-1069001_1	NM_001007466	TULP4	+	hsa-miR-28-5p	AAGGAGCTCACAGTCTATTGAG	rs141158549	chr6	+	158923451	C/T	67	gtggaggaggtgtgccggccccgcacccGGATgcTGtGCTCCcagaacacgtacaccctccccggcccgggtagc	intersect
L1HS-1069001_1	NM_001007466	TULP4	+	hsa-miR-28-5p	AAGGAGCTCACAGTCTATTGAG	rs138201740	chr6	+	158923400	A/G	16	gtggaggaggtgtgccggccccgcacccGGATgcTGtGCTCCcagaacacgtacaccctccccggcccgggtagc	intersect
L1HS-1069001_1	NM_001007466	TULP4	+	hsa-miR-28-5p	AAGGAGCTCACAGTCTATTGAG	rs143772991	chr6	+	158923416	A/G	32	gtggaggaggtgtgccggccccgcacccGGATgcTGtGCTCCcagaacacgtacaccctccccggcccgggtagc	intersect
L1HS-1069001_1	NM_001007466	TULP4	+	hsa-miR-28-5p	AAGGAGCTCACAGTCTATTGAG	rs9364968	chr6	+	158923434	C/G	50	gtggaggaggtgtgccggccccgcacccGGATgcTGtGCTCCcagaacacgtacaccctccccggcccgggtagc	intersect
L2HS-486792_3	NM_001007561	IRGQ	-	hsa-miR-423-3p	AGCTCGGTCTGAGGCCCCTCAGT	rs182857417	chr19	+	44089398	G/T	29	CAGAgCGAGacttctctcaaaaaaaaaaaaccaaagtgcttatgcac	psychotic
L2HS-486792_3	NM_001007561	IRGQ	-	hsa-miR-423-3p	AGCTCGGTCTGAGGCCCCTCAGT	rs78960860	chr19	+	44089410	G/T	17	CAGAgCGAGacttctctcaaaaaaaaaaaaccaaagtgcttatgcac	psychotic
L2HS-486792_3	NM_001007561	IRGQ	-	hsa-miR-423-3p	AGCTCGGTCTGAGGCCCCTCAGT	rs188334817	chr19	+	44089423	C/T	4	CAGAgCGAGacttctctcaaaaaaaaaaaaccaaagtgcttatgcac	psychotic
L2-781435_1	NM_001013	RPS9	+	hsa-miR-423-5p	TGAGGGGCAGAGAGCGAGACTTT	rs15938	chr19	+	54711369	G/T	39	gaCTTCTCTCTGCgCTCTCcctacgggggtggccgcccgggccgcg	affective
L2HS-1667326_1	NM_001018076	NR3C1	-	hsa-miR-421	ATCAACAGACATTAATTGGGCGC	rs72466433	chr5	-	142661102	-/C	37	tGCCCAAaGTCTGTgTGATgaactttctcttcatactttttttcacagttggctggatg	intersect
0727AHS-1371401_1	NM_001024228	ARF1	+	hsa-miR-320b	AAAAGCTGGGTTGAGAGGGCAA	rs185819366	chr1	+	228285776	C/T	41	acTCCTCTTGCCCtctGCTTTactctcatgtggcaaacgtgcggct	intersect
TA1-2025292-1_1	NM_001024947	YIPF5	-	hsa-miR-423-3p	AGCTCGGTCTGAGGCCCCTCAGT	rs4505984	chr5	+	143538616	A/G	27	ttgtcatgtTCTCttGCCaGAGagaatctgtaggaaaatactg	psychotic
L2HS-2698654_1	NM_001037131	AGAP1	+	hsa-miR-324-5p	CGCATCCCCTAGGGCATTGGTGT	rs113696247	chr2	+	237033776	A/G	19	tatttgatgtCCtttTGCCgAGGtGGATGTGttagtctcaggccctcctggaccacgt	intersect
TAON-1917568-1_1	NM_001042559	EIF4G2	-	hsa-miR-421	ATCAACAGACATTAATTGGGCGC	rs11542384	chr11	-	10821185	A/C/G/T	45	caaattggagaaggaaCTGTTGAagcaaataaagttggatccatcccctca	intersect
TA1-4592973-1_1	NM_001077440	BCLAF1	-	hsa-miR-423-5p	TGAGGGGCAGAGAGCGAGACTTT	rs111296119	chr6	+	136581882	A/G	50	GTTcTGaTTCTCTTCCTTCcctgtttgtcaatgttttattctgaagtaaacgttagctctacatataaa	intersect
TA1-853111-1_1	NM_001077484	SLC38A1	-	hsa-miR-320d	AAAAGCTGGGTTGAGAGGA	rs2289772	chr12	-	46581857	A/G	47	aaaatgcctaagaaaatacTCCTCtgatgcatttagcctTCAACCCtacctgtcttGCTgaagggagaa	intersect
TA1-853111-1_1	NM_001077484	SLC38A1	-	hsa-miR-320d	AAAAGCTGGGTTGAGAGGA	rs12414	chr12	+	46581845	C/T	59	aaaatgcctaagaaaatacTCCTCtgatgcatttagcctTCAACCCtacctgtcttGCTgaagggagaa	intersect
L2-1378775_1	NM_001077489	GNAS	+	hsa-miR-320b	AAAAGCTGGGTTGAGAGGGCAA	rs15053	chr20	+	57486132	A/T	27	aaaagttCCCTCTCActTTCAGTaaaaataaataaaacagcagcag	intersect
L2-1378775_1	NM_001077489	GNAS	+	hsa-miR-320b	AAAAGCTGGGTTGAGAGGGCAA	rs113675579	chr20	+	57486131	-/AAT	26	aaaagttCCCTCTCActTTCAGTaaaaataaataaaacagcagcag	intersect
L2-2511226_1	NM_001077489	GNAS	+	hsa-miR-320b	AAAAGCTGGGTTGAGAGGGCAA	rs3199305	chr20	+	57486045	C/G/T	25	gaaacccCCTTTTCccTTCAGCTTgcttagatgttccaaatttaga	intersect
L2-2093395_1	NM_001078166	SRSF1	-	hsa-miR-423-3p	AGCTCGGTCTGAGGCCCCTCAGT	rs142072157	chr17	+	56082908	A/G	30	taaagTTGAtGGGCCCAGAagtCCaAGTTatggaagatctcgatctcgaagccg	intersect
L2HS-1409352_2	NM_001080950	MYO1C	-	hsa-miR-324-5p	CGCATCCCCTAGGGCATTGGTGT	rs140794995	chr17	+	1373955	C/G	24	aaagatCCAAgcTGCCTggAGGGGctttcactgGCGgcagaaattcctcc	affective
L2HS-1409352_2	NM_001080950	MYO1C	-	hsa-miR-324-5p	CGCATCCCCTAGGGCATTGGTGT	rs201915587	chr17	+	1373976	C/G	3	aaagatCCAAgcTGCCTggAGGGGctttcactgGCGgcagaaattcctcc	affective
L2-1418159_1	NM_001098208	HNRNPF	-	hsa-miR-339-5p	TCCCTGTCCTCCAGGAGCTCACG	rs150534928	chr10	+	43883288	A/G	38	cTGGGCcCTgagGGAGGtgaAGGctttgtggtcaagctccgtggcctgccc	intersect
L2-2093314_1	NM_001098426	SMARCD2	-	hsa-miR-423-3p	AGCTCGGTCTGAGGCCCCTCAGT	rs1130111	chr17	-	61910514	C/T	8	tgatgtgattggaaatcCTGAGGaGGagAGACGAGCTgctttctacc	intersect
L2HS-3786747_1	NM_001113239	HIPK2	-	hsa-miR-423-5p	TGAGGGGCAGAGAGCGAGACTTT	rs181159142	chr7	+	139415937	C/T	32	aagcaaaacAAGTTTaGCcccTTGCCCCTCAaatacattcgcccagttctccagcaggt	intersect
L2HS-2462401_1	NM_001128159	VPS53	-	hsa-miR-28-3p	CACTAGATTGTGAGCTCCTGGA	rs7214241	chr17	+	418171	G/T	37	gaaaCAGGAGCCGCAATggacaaGGTGttctgatctccaaacccagctcagggat	intersect
L2HS-2055299_1	NM_001128615	ARHGEF3	-	hsa-miR-769-5p	TGAGACCTCTGGGTTCTGAGCT	rs143936569	chr3	+	56762159	A/G	42	GTTCTCCAGAGGccaaTTTCAttaactctgattaattagaatca	intersect
L1-1017411_1	NM_001136125	CCND3	-	hsa-miR-324-5p	CGCATCCCCTAGGGCATTGGTGT	rs11552780	chr6	-	41904324	C/G	27	cATGTCCGGGGATGagctcacagagctgctggcagggatcactg	affective
L2HS-2955302_1	NM_001142299	SQSTM1	+	hsa-miR-423-5p	TGAGGGGCAGAGAGCGAGACTTT	rs117531194	chr5	+	179263851	C/T	3	cagcgCGCTCCTGaCCCCTCcctgcaggggctacgttagcagcccagcacatagcttgcctaatggctttcactt	affective
L2HS-2955302_1	NM_001142299	SQSTM1	+	hsa-miR-423-5p	TGAGGGGCAGAGAGCGAGACTTT	rs11548631	chr5	-	179263872	C/G	24	cagcgCGCTCCTGaCCCCTCcctgcaggggctacgttagcagcccagcacatagcttgcctaatggctttcactt	affective
L2HS-2955302_1	NM_001142299	SQSTM1	+	hsa-miR-423-5p	TGAGGGGCAGAGAGCGAGACTTT	rs11548630	chr5	-	179263912	C/T	64	cagcgCGCTCCTGaCCCCTCcctgcaggggctacgttagcagcccagcacatagcttgcctaatggctttcactt	affective
L1HS-379127_3	NM_001144966	NEDD4L	+	hsa-miR-423-5p	TGAGGGGCAGAGAGCGAGACTTT	rs147209028	chr18	+	55998040	C/T	34	ggagactctctcGGTCTgGCTCTGCCCCCAccaccggcctccccaggatctcg	intersect
0727A-755012_1	NM_001146114	DIP2A	+	hsa-miR-423-5p	TGAGGGGCAGAGAGCGAGACTTT	rs113394836	chr21	+	47975944	C/T	19	tTTTCagGCCCCcctcccccgatgtcctcgcatacttggactt	intersect
L1-1113770_1	NM_001146158	MOGS	-	hsa-miR-423-3p	AGCTCGGTCTGAGGCCCCTCAGT	rs34838944	chr2	-	74689671	C/G	2	atcggggtgGAaGGGTCTgagcagaaggTGGACCcAGCcctctttcc	psychotic
L2HS-801449_2	NM_001166293	SSX2IP	-	hsa-miR-339-5p	TCCCTGTCCTCCAGGAGCTCACG	rs112687613	chr1	+	85131862	C/T	21	TGGGCTTCaGGAaagaGACAGacagttacaatgtaagaacaggaatttgcatca	intersect
TAON-1917553-1_1	NM_001171506	MCFD2	-	hsa-miR-421	ATCAACAGACATTAATTGGGCGC	rs115137793	chr2	+	47130878	A/G	25	aaaaGCaCCCAAgtcacCTGTTGAacactttgctgcttagaaatttcttccgctagttaacct	intersect
TAON-1917553-1_1	NM_001171506	MCFD2	-	hsa-miR-421	ATCAACAGACATTAATTGGGCGC	rs6544935	chr2	+	47130850	A/G	53	aaaaGCaCCCAAgtcacCTGTTGAacactttgctgcttagaaatttcttccgctagttaacct	intersect
L2HS-3148764_1	NM_001172411	VANGL1	+	hsa-miR-324-5p	CGCATCCCCTAGGGCATTGGTGT	rs3811013	chr1	-	116234083	A/T	25	ATCtATGCCagAGGGGTGTcttttttaaaaattcttcttcattgctgact	intersect
TAON-1917719-1_1	NM_001177663	RIF1	+	hsa-miR-421	ATCAACAGACATTAATTGGGCGC	rs201634772	chr2	+	152315399	A/T	32	GCCTGGTTtggaaaCTGTTGAaatgatggaggaatccagtggaccatattctgatg	intersect
TAON-1917719-1_1	NM_001177663	RIF1	+	hsa-miR-421	ATCAACAGACATTAATTGGGCGC	rs147868788	chr2	+	152315376	A/G	9	GCCTGGTTtggaaaCTGTTGAaatgatggaggaatccagtggaccatattctgatg	intersect
TAON-2773297-1_1	NM_001186	BACH1	+	hsa-miR-769-5p	TGAGACCTCTGGGTTCTGAGCT	rs144158872	chr21	+	30699463	A/G	54	aaagatGGCTCAGAACagatctcaCAGAaacGGTCTgagtgtccgtggttaggtatcaggattagtga	intersect
TAON-2773297-1_1	NM_001186	BACH1	+	hsa-miR-769-5p	TGAGACCTCTGGGTTCTGAGCT	rs139083953	chr21	+	30699439	C/T	30	aaagatGGCTCAGAACagatctcaCAGAaacGGTCTgagtgtccgtggttaggtatcaggattagtga	intersect
TAON-2773297-1_1	NM_001186	BACH1	+	hsa-miR-769-5p	TGAGACCTCTGGGTTCTGAGCT	rs199690512	chr21	+	30699452	C/G	43	aaagatGGCTCAGAACagatctcaCAGAaacGGTCTgagtgtccgtggttaggtatcaggattagtga	intersect
TAON-2773297-1_1	NM_001186	BACH1	+	hsa-miR-769-5p	TGAGACCTCTGGGTTCTGAGCT	rs139219595	chr21	+	30699426	C/G	17	aaagatGGCTCAGAACagatctcaCAGAaacGGTCTgagtgtccgtggttaggtatcaggattagtga	intersect
TAON-2773297-1_1	NM_001186	BACH1	+	hsa-miR-769-5p	TGAGACCTCTGGGTTCTGAGCT	rs200791937	chr21	+	30699453	A/G	44	aaagatGGCTCAGAACagatctcaCAGAaacGGTCTgagtgtccgtggttaggtatcaggattagtga	intersect
L2HS-2698518_1	NM_001198528	TCF7L2	+	hsa-miR-324-5p	CGCATCCCCTAGGGCATTGGTGT	rs11196251	chr10	+	114926790	C/T	28	tgaACTCCCAGtGGGATGCcctaccctgcgcccttaggacccggact	intersect
L2HS-2698518_1	NM_001198528	TCF7L2	+	hsa-miR-324-5p	CGCATCCCCTAGGGCATTGGTGT	rs187178316	chr10	+	114926802	C/T	40	tgaACTCCCAGtGGGATGCcctaccctgcgcccttaggacccggact	intersect
L2HS-2698518_1	NM_001198528	TCF7L2	+	hsa-miR-324-5p	CGCATCCCCTAGGGCATTGGTGT	rs150438785	chr10	+	114926791	A/G	29	tgaACTCCCAGtGGGATGCcctaccctgcgcccttaggacccggact	intersect
L2HS-2698518_1	NM_001198528	TCF7L2	+	hsa-miR-324-5p	CGCATCCCCTAGGGCATTGGTGT	rs138209264	chr10	+	114926805	C/G	43	tgaACTCCCAGtGGGATGCcctaccctgcgcccttaggacccggact	intersect
L2HS-1383047_2	NM_001199140	AMMECR1L	-	hsa-miR-423-3p	AGCTCGGTCTGAGGCCCCTCAGT	rs181815446	chr2	+	128622445	A/T	44	aaacagaacTTGAGGGGCCCAaGCCttatctcagcctttcctcaatatggggttccgttggattggggctcc	psychotic
TA1-3124794-1_1	NM_001201366	DNAL1	+	hsa-miR-324-5p	CGCATCCCCTAGGGCATTGGTGT	rs186188407	chr14	+	74165935	G/T	68	ttttataccaacatCACTtGTGTCCAGGGtccatttattttcagtctgtagccatgtgccacttgaattg	psychotic
L2HS-3732399_1	NM_001241	CCNT2	+	hsa-miR-423-3p	AGCTCGGTCTGAGGCCCCTCAGT	rs13389642	chr2	+	135716598	C/T	37	TTGGGGcGGaaaCTCAaaatcCCGAGCattgccactttagtagtttgtttgatttgcctattgtttaataatgag	intersect
L1HS-1296277_1	NM_001244698	ZFP36L1	-	hsa-miR-423-5p	TGAGGGGCAGAGAGCGAGACTTT	rs182769754	chr14	+	69256204	A/G	27	cTCcTGCctaCTCcaGCCCCTaccctgcacccacatcccatacc	intersect
L2HS-1589359_1	NM_001417	EIF4B	+	hsa-miR-423-3p	AGCTCGGTCTGAGGCCCCTCAGT	rs200433061	chr12	+	53412646	A/C	31	tgtatAGGGcGCCTCcaattGACCGttccatccttcccactgctccacgGGCTgctc	psychotic
L2HS-2698564_1	NM_001453	FOXC1	+	hsa-miR-324-5p	CGCATCCCCTAGGGCATTGGTGT	rs104893952	chr6	+	1610747	C/T	33	tccctgggagtGGTGCCCTAcctcGGcgGCGagcagagctacta	intersect
L2-781432_1	NM_001759	CCND2	+	hsa-miR-423-5p	TGAGGGGCAGAGAGCGAGACTTT	rs192655661	chr12	+	4412533	C/G	6	tttgttccaGAGgaGCTCTCCCCCTTggatttgaacttgctctttttgt	intersect
L1HS-102144_8	NM_002035	KDSR	-	hsa-miR-423-3p	AGCTCGGTCTGAGGCCCCTCAGT	rs138791943	chr18	+	60999066	A/T	21	aagttTTGAcaGCaTAGtTCGtcGCTgcatgatgcagagagaaaaatctgaaaat	intersect
L2HS-2151061_1	NM_002136	HNRNPA1	+	hsa-miR-324-5p	CGCATCCCCTAGGGCATTGGTGT	rs4081712	chr12	+	54675629	A/G	50	gtaatgagagatccaaACACCAAgcGCTCcAGGGGcttTGggtttgtcacatatgccactgtgg	affective
L2HS-2151061_1	NM_002136	HNRNPA1	+	hsa-miR-324-5p	CGCATCCCCTAGGGCATTGGTGT	rs1055942	chr12	+	54675608	C/T	29	gtaatgagagatccaaACACCAAgcGCTCcAGGGGcttTGggtttgtcacatatgccactgtgg	affective
L2HS-2151061_1	NM_002136	HNRNPA1	+	hsa-miR-324-5p	CGCATCCCCTAGGGCATTGGTGT	rs11538705	chr12	+	54675624	G/T	45	gtaatgagagatccaaACACCAAgcGCTCcAGGGGcttTGggtttgtcacatatgccactgtgg	affective
L2HS-2151061_1	NM_002136	HNRNPA1	+	hsa-miR-324-5p	CGCATCCCCTAGGGCATTGGTGT	rs11554078	chr12	+	54675580	C/T	1	gtaatgagagatccaaACACCAAgcGCTCcAGGGGcttTGggtttgtcacatatgccactgtgg	affective
L2-1612352_1	NM_002383	MAZ	+	hsa-miR-326	CCTCTGGGCCCTTCCTCCAG	rs1043958	chr16	+	29822267	A/G	2	tagaggtgcttcCTGGGGGcGGGGGaatgcagCCAGtgtccccctcc	psychotic
L2HS-3456195_1	NM_002435	MPI	+	hsa-miR-324-5p	CGCATCCCCTAGGGCATTGGTGT	rs201263032	chr15	+	75190001	A/G	48	agACACCAATCCCTctgcaacgtGGtGGcGTGCtcttcattggggccaatgagagtgtctcactgaagctta	psychotic
L2-2292979_1	NM_002745	MAPK1	-	hsa-miR-769-5p	TGAGACCTCTGGGTTCTGAGCT	rs1063311	chr22	-	22116467	A/G	20	acccaGCCCAGGGtgCTCAcgctcaccactcctgtggctgaggaagga	psychotic
L2HS-735608_3	NM_002886	RAP2B	+	hsa-miR-324-5p	CGCATCCCCTAGGGCATTGGTGT	rs188994656	chr3	+	152881750	A/G	13	aACACTGATGCCaatacagTGtGGGGTGCcagaaagtgtctgctgatatttgtggaaaaaaa	intersect
L2HS-819268_2	NM_003043	SLC6A6	+	hsa-miR-423-5p	TGAGGGGCAGAGAGCGAGACTTT	rs35730745	chr3	+	14529982	-/C	48	caGCaTCTCccagcacaGCCCCTCtccctggggaaatgctctgggtagc	intersect
L1HS-216325_5	NM_003290	TPM4	+	hsa-miR-28-5p	AAGGAGCTCACAGTCTATTGAG	rs3207457	chr19	+	16212308	A/G	1	agaaGCTtTGAGCaCCagttaaatctcattccttccctttttttttcaaatgg	psychotic
0727AHS-691936_2	NM_004034	ANXA7	-	hsa-miR-324-5p	CGCATCCCCTAGGGCATTGGTGT	rs144869858	chr10	+	75139902	A/G	32	taaacCACCAAatgGCTCAGGaaGATGCtcagcgtctctatcaagctggtgag	psychotic
0727AHS-691936_2	NM_004034	ANXA7	-	hsa-miR-324-5p	CGCATCCCCTAGGGCATTGGTGT	rs78636994	chr10	+	75139901	C/T	33	taaacCACCAAatgGCTCAGGaaGATGCtcagcgtctctatcaagctggtgag	psychotic
TAON-1917640-1_1	NM_004090	DUSP3	-	hsa-miR-421	ATCAACAGACATTAATTGGGCGC	rs12940026	chr17	+	41845370	G/T	22	CAGgGActTTTGTTGActatttacaactcagttttacatttaa	psychotic
L2HS-2747553_1	NM_004393	DAG1	+	hsa-miR-423-5p	TGAGGGGCAGAGAGCGAGACTTT	rs2131107	chr3	-	49548008	C/G	23	ccTCTCGCTgCTgCTGCCCCTCtcggggaggacctttctcctcctgctctctgtggttatggctcagtcccactg	intersect
L2HS-3320494_1	NM_004514	FOXK2	+	hsa-miR-769-5p	TGAGACCTCTGGGTTCTGAGCT	rs187193884	chr17	+	80560369	A/C	26	tttgaaaCTCAGAtCCCAGGTCTCtccgtggtatgtttgtatttggggtgtccctcc	intersect
L2HS-2698552_1	NM_004714	DYRK1B	-	hsa-miR-324-5p	CGCATCCCCTAGGGCATTGGTGT	rs142076547	chr19	+	40321355	C/T	28	tgGCCTTccGGGATGCaacctcagccccgctgcgtaagctctctg	psychotic
L2-1575672_1	NM_004924	ACTN4	+	hsa-miR-324-5p	CGCATCCCCTAGGGCATTGGTGT	rs8112979	chr19	+	39220420	C/T	63	cccacagcacaACCGgtcccttccATGCCCTGGGATGCctcaccacacccaggtctcttcctttgc	intersect
L2HS-1338835_2	NM_005688	ABCC5	-	hsa-miR-423-5p	TGAGGGGCAGAGAGCGAGACTTT	rs4148596	chr3	-	183638030	(TC)6/8	1	tcccctcAAAGTCTgcaactttaagcaGCTCTTGCTaaTCAgtgtc	intersect
L2HS-1338835_2	NM_005688	ABCC5	-	hsa-miR-423-5p	TGAGGGGCAGAGAGCGAGACTTT	rs111657478	chr3	+	183638030	-/GAGA	1	tcccctcAAAGTCTgcaactttaagcaGCTCTTGCTaaTCAgtgtc	intersect
L2HS-1338835_2	NM_005688	ABCC5	-	hsa-miR-423-5p	TGAGGGGCAGAGAGCGAGACTTT	rs150303978	chr3	+	183638030	-/GA	1	tcccctcAAAGTCTgcaactttaagcaGCTCTTGCTaaTCAgtgtc	intersect
L1HS-315168_4	NM_005811	GDF11	+	hsa-miR-423-5p	TGAGGGGCAGAGAGCGAGACTTT	rs140194817	chr12	+	56142662	C/T	13	aagtgctacacagctggttccgccagccacagagcaactggggcatcGAGaTCaaCGCCTTTGaTCCCagtggcaca	intersect
L1HS-315168_4	NM_005811	GDF11	+	hsa-miR-423-5p	TGAGGGGCAGAGAGCGAGACTTT	rs201160764	chr12	+	56142670	C/G	21	aagtgctacacagctggttccgccagccacagagcaactggggcatcGAGaTCaaCGCCTTTGaTCCCagtggcaca	intersect
L1HS-315168_4	NM_005811	GDF11	+	hsa-miR-423-5p	TGAGGGGCAGAGAGCGAGACTTT	rs79198703	chr12	+	56142667	C/T	18	aagtgctacacagctggttccgccagccacagagcaactggggcatcGAGaTCaaCGCCTTTGaTCCCagtggcaca	intersect
L1HS-493852_2	NM_005870	SAP18	+	hsa-miR-324-5p	CGCATCCCCTAGGGCATTGGTGT	rs17852854	chr13	+	21721334	A/G	7	ttaaggagattggcaGCACCATGTCTggcagaaAGGGGActgatgattccatgacccTGCagtcgc	psychotic
TAON-1917721-1_1	NM_006267	RANBP2	+	hsa-miR-421	ATCAACAGACATTAATTGGGCGC	rs200526519	chr2	+	109381927	A/C	16	cttctgcagtttcaacacctgcctcttcagagacaagcaagGCtCCAAagagcgga	intersect
TAON-1917721-1_1	NM_006267	RANBP2	+	hsa-miR-421	ATCAACAGACATTAATTGGGCGC	rs138946474	chr2	+	109381913	A/T	2	cttctgcagtttcaacacctgcctcttcagagacaagcaagGCtCCAAagagcgga	intersect
L2HS-3425495_1	NM_006628	ARPP19	-	hsa-miR-324-5p	CGCATCCCCTAGGGCATTGGTGT	rs12232368	chr15	+	52840866	C/G	60	agatACattCCAAgacCCCTAGtGGATGCctgaaacctcagatagtactgaaccctttatca	intersect
L1HS-740114_2	NM_006738	AKAP13	+	hsa-miR-423-5p	TGAGGGGCAGAGAGCGAGACTTT	rs202176585	chr15	+	86228004	A/G	13	aattTCcTGCcacataGCCCCTCcaagaaagattctgaatgga	psychotic
L1HS-740114_2	NM_006738	AKAP13	+	hsa-miR-423-5p	TGAGGGGCAGAGAGCGAGACTTT	rs116088880	chr15	+	86228029	A/G	38	aattTCcTGCcacataGCCCCTCcaagaaagattctgaatgga	psychotic
L1HS-1299498_1	NM_006813	PNRC1	+	hsa-miR-423-5p	TGAGGGGCAGAGAGCGAGACTTT	rs201391956	chr6	+	89790877	C/G	43	cTCcaGCagCTCTGCCCaaccgcagcctcgccgtggcgggaggcac	affective
L1HS-907692_1	NM_006862	TDRKH	-	hsa-miR-423-5p	TGAGGGGCAGAGAGCGAGACTTT	rs115658720	chr1	+	151746462	C/G	1	tcagGCTCaGtCCCCTCtaccagtcatgattcacattactact	psychotic
L2-1575813_1	NM_007190	SEC23IP	+	hsa-miR-324-5p	CGCATCCCCTAGGGCATTGGTGT	rs182360334	chr10	+	121700754	C/G	26	atttTCAAgaaGTCCTGGGAaGCGctctcctagcacgtccatttccaggag	psychotic
L2-1575813_1	NM_007190	SEC23IP	+	hsa-miR-324-5p	CGCATCCCCTAGGGCATTGGTGT	rs145952929	chr10	+	121700775	C/G	47	atttTCAAgaaGTCCTGGGAaGCGctctcctagcacgtccatttccaggag	psychotic
L2-1575813_1	NM_007190	SEC23IP	+	hsa-miR-324-5p	CGCATCCCCTAGGGCATTGGTGT	rs147812112	chr10	+	121700776	C/G	48	atttTCAAgaaGTCCTGGGAaGCGctctcctagcacgtccatttccaggag	psychotic
L2-319208_2	NM_007202	AKAP10	-	hsa-miR-339-5p	TCCCTGTCCTCCAGGAGCTCACG	rs138915823	chr17	+	19809210	A/G	54	aacccatttatgagaGTGttttAGCctaCTGGAataGACAGGGAccacatcctctgggaagcagataagca	psychotic
L2HS-2555368_1	NM_012426	SF3B3	+	hsa-miR-423-3p	AGCTCGGTCTGAGGCCCCTCAGT	rs200755204	chr16	+	70594381	C/T	6	ggtgtgctGCTGAGGactGTCTTGGACCctGTcactggggatttgtctgatac	psychotic
L2-1329781_1	NM_013321	SNX8	-	hsa-miR-423-5p	TGAGGGGCAGAGAGCGAGACTTT	rs147958166	chr7	+	2296581	G/T	1	tccacGTCTacCTGCCCCTCAcctcccacatcctccgcgccttcgtc	intersect
L2-1329781_1	NM_013321	SNX8	-	hsa-miR-423-5p	TGAGGGGCAGAGAGCGAGACTTT	rs111482574	chr7	+	2296543	A/G	39	tccacGTCTacCTGCCCCTCAcctcccacatcctccgcgccttcgtc	intersect
L2-252345_3	NM_013321	SNX8	-	hsa-miR-107	AGCAGCATTGTACAGGGCTATCA	rs140651465	chr7	+	2296590	C/T	29	ttctCCCTGTACtGCcTGCaccaggagacgcagctcatccacgt	intersect
L2-252345_3	NM_013321	SNX8	-	hsa-miR-107	AGCAGCATTGTACAGGGCTATCA	rs150480674	chr7	+	2296618	A/T	1	ttctCCCTGTACtGCcTGCaccaggagacgcagctcatccacgt	intersect
L2-1329781_1	NM_013321	SNX8	-	hsa-miR-423-5p	TGAGGGGCAGAGAGCGAGACTTT	rs144787122	chr7	+	2296552	A/G	30	tccacGTCTacCTGCCCCTCAcctcccacatcctccgcgccttcgtc	intersect
L1HS-452480_3	NM_015020	PHLPP2	-	hsa-miR-769-5p	TGAGACCTCTGGGTTCTGAGCT	rs7188675	chr16	+	71680002	C/T	28	acttccgagtaCTTtACCCAGAGGatgtgttccccaggtgggcagagtacagttgatctc	intersect
L2HS-1332857_2	NM_015231	NUP160	-	hsa-miR-324-5p	CGCATCCCCTAGGGCATTGGTGT	rs200665743	chr11	+	47861403	C/T	47	ACCatGTGCTtCTGGGGGAatctttgttcttaagctacctccttatgaca	intersect
L2HS-1725232_1	NM_015310	PSD3	-	hsa-miR-326	CCTCTGGGCCCTTCCTCCAG	rs141947756	chr8	+	18729647	C/T	24	aatgGGAGGAaaGGGGCTgtctgtgtgcaggagccatcttgtc	intersect
L2HS-1725232_1	NM_015310	PSD3	-	hsa-miR-326	CCTCTGGGCCCTTCCTCCAG	rs200902388	chr8	+	18729630	A/C	41	aatgGGAGGAaaGGGGCTgtctgtgtgcaggagccatcttgtc	intersect
L2-2093421_1	NM_015350	LRRC8B	+	hsa-miR-423-3p	AGCTCGGTCTGAGGCCCCTCAGT	rs199833614	chr1	+	90050164	C/T	3	agattGGGGCattaTCtaACCtaGAGCagctctctttggaccataat	psychotic
L2HS-687848_3	NM_015393	PARM1	+	hsa-miR-324-5p	CGCATCCCCTAGGGCATTGGTGT	rs144921999	chr4	+	75937886	A/G	37	agaagaggagatCACCAGCCCaGGttcgaattGGGAagGCacaaacacagac	psychotic
L2HS-1251152_2	NM_015455	CNOT6	+	hsa-miR-769-5p	TGAGACCTCTGGGTTCTGAGCT	rs185387009	chr5	+	180001938	C/T	32	aggatgttTTCAGACCAGAGGcaaCTTattcatgaatttttatgaaaactat	intersect
L1HS-1155711_1	NM_015475	FAM98A	-	hsa-miR-423-5p	TGAGGGGCAGAGAGCGAGACTTT	rs200115569	chr2	+	33813509	C/T	43	GCTCTgtgtgaaTGCTCCTCcaaaaaaagctcaagaaggaggcggtagtgag	psychotic
L2-2129825_1	NM_015497	TMEM87A	-	hsa-miR-107	AGCAGCATTGTACAGGGCTATCA	rs143417687	chr15	+	42502946	A/G	0	cgTGGaGGCCCTGgACtGCTGCTcgttctttaggatggactgttctgg	intersect
L2-2129825_1	NM_015497	TMEM87A	-	hsa-miR-107	AGCAGCATTGTACAGGGCTATCA	rs184342411	chr15	+	42502913	C/T	33	cgTGGaGGCCCTGgACtGCTGCTcgttctttaggatggactgttctgg	intersect
L2-2129825_1	NM_015497	TMEM87A	-	hsa-miR-107	AGCAGCATTGTACAGGGCTATCA	rs73407419	chr15	+	42502916	A/G	30	cgTGGaGGCCCTGgACtGCTGCTcgttctttaggatggactgttctgg	intersect
L2-1499447_1	NM_015549	PLEKHG3	+	hsa-miR-339-5p	TCCCTGTCCTCCAGGAGCTCACG	rs200388786	chr14	+	65208130	C/T	41	cGTGGCacaGGAGGACAgcaagtccagtggctttGGGAgcccgcggct	psychotic
L2-1499447_1	NM_015549	PLEKHG3	+	hsa-miR-339-5p	TCCCTGTCCTCCAGGAGCTCACG	rs149456328	chr14	+	65208118	A/G	29	cGTGGCacaGGAGGACAgcaagtccagtggctttGGGAgcccgcggct	psychotic
L2-1499447_1	NM_015549	PLEKHG3	+	hsa-miR-339-5p	TCCCTGTCCTCCAGGAGCTCACG	rs138535740	chr14	+	65208133	A/G	44	cGTGGCacaGGAGGACAgcaagtccagtggctttGGGAgcccgcggct	psychotic
L2-516600_2	NM_015950	MRPL2	-	hsa-miR-107	AGCAGCATTGTACAGGGCTATCA	rs34298469	chr6	+	43021977	-/G	33	atCCCTGTACtctaataaAATGCcccccccccccgttttaatctgt	affective
0727A-306795_2	NM_018061	PRPF38B	+	hsa-miR-423-5p	TGAGGGGCAGAGAGCGAGACTTT	rs11544312	chr1	+	109242720	C/T	33	aaaTCTGCTTTTTtCCCCCAcgttgagattgtgcagtagttcg	intersect
0727AHS-704183_2	NM_018067	MAP7D1	+	hsa-miR-320b	AAAAGCTGGGTTGAGAGGGCAA	rs78771983	chr1	+	36646102	C/T	27	acatcCCTTCTCcCCCAtacacacatatacactcacagcctctc	affective
0727AHS-704183_2	NM_018067	MAP7D1	+	hsa-miR-320b	AAAAGCTGGGTTGAGAGGGCAA	rs199922532	chr1	+	36646107	C/T	32	acatcCCTTCTCcCCCAtacacacatatacactcacagcctctc	affective
L2HS-644578_3	NM_018292	QRSL1	+	hsa-miR-769-5p	TGAGACCTCTGGGTTCTGAGCT	rs112965704	chr6	+	107100204	A/G	43	atGGCTTAGtttCCCGtcatGGTCTCAttcccctggtgaattcgatggatgtgcca	intersect
L2HS-644578_3	NM_018292	QRSL1	+	hsa-miR-769-5p	TGAGACCTCTGGGTTCTGAGCT	rs146391577	chr6	+	107100208	A/G	47	atGGCTTAGtttCCCGtcatGGTCTCAttcccctggtgaattcgatggatgtgcca	intersect
L2HS-644578_3	NM_018292	QRSL1	+	hsa-miR-769-5p	TGAGACCTCTGGGTTCTGAGCT	rs144555270	chr6	+	107100212	G/T	51	atGGCTTAGtttCCCGtcatGGTCTCAttcccctggtgaattcgatggatgtgcca	intersect
L2HS-3021378_1	NM_018686	CMAS	+	hsa-miR-421	ATCAACAGACATTAATTGGGCGC	rs146887115	chr12	+	22218149	C/T	55	gcctaagtggcgctcctgctgatgcctgttctacTGCCCAGaAGgCTGTTGGataca	psychotic
L2HS-3021378_1	NM_018686	CMAS	+	hsa-miR-421	ATCAACAGACATTAATTGGGCGC	rs139408586	chr12	+	22218101	G/T	7	gcctaagtggcgctcctgctgatgcctgttctacTGCCCAGaAGgCTGTTGGataca	psychotic
L2-1082236_1	NM_018704	CTTNBP2NL	+	hsa-miR-324-5p	CGCATCCCCTAGGGCATTGGTGT	rs146344185	chr1	+	112999329	C/T	42	GTGTCCTGtGGGGATtgagactccagtcccaatgcccagtcccctctct	psychotic
L2HS-1690140_1	NM_018841	GNG12	-	hsa-miR-423-5p	TGAGGGGCAGAGAGCGAGACTTT	rs184989709	chr1	+	68169399	C/T	38	tccaagttgctatctaCTCaGCcTTatgaaTGCCCCTCgcttttctaaggccatgtgaaaatcacgg	psychotic
L2-483453_2	NM_020928	ZSWIM6	+	hsa-miR-502-3p	AATGCACCTGGGCAAGGATTCA	rs201456886	chr5	+	60835518	A/G	32	acatcttcaagCTTGCCCAaGaTGCATTtaaaatagcaactctcat	psychotic
L2-2053595_1	NM_021090	MTMR3	+	hsa-miR-423-5p	TGAGGGGCAGAGAGCGAGACTTT	rs199966820	chr22	+	30416172	A/G	60	acctcacAGTCaTGTTCTCTGCTaCCTTcccaagtcccttttgagaccagaggaccaaacgtggac	intersect
TA1-1247152-1_1	NM_021999	ITM2B	+	hsa-miR-320b	AAAAGCTGGGTTGAGAGGGCAA	rs113956182	chr13	+	48830350	A/C	11	aaagtacatcaaagatgatgtcatcttaaatgaGCCCTCTgCAGatgcCCCAGCTgctctctaccaga	intersect
L2HS-1083769_2	NM_022574	GIGYF1	-	hsa-miR-324-5p	CGCATCCCCTAGGGCATTGGTGT	rs201850126	chr7	+	100279548	A/G	19	acaGCACCAAactcgGCCCcGGGGAggGCagcaaggccaagaggcgggcactga	psychotic
L2HS-1083769_2	NM_022574	GIGYF1	-	hsa-miR-324-5p	CGCATCCCCTAGGGCATTGGTGT	rs200216197	chr7	+	100279522	C/T	45	acaGCACCAAactcgGCCCcGGGGAggGCagcaaggccaagaggcgggcactga	psychotic
L2HS-1083769_2	NM_022574	GIGYF1	-	hsa-miR-324-5p	CGCATCCCCTAGGGCATTGGTGT	rs140690707	chr7	+	100279553	C/T	14	acaGCACCAAactcgGCCCcGGGGAggGCagcaaggccaagaggcgggcactga	psychotic
L1HS-360312_3	NM_022754	SFXN1	+	hsa-miR-28-3p	CACTAGATTGTGAGCTCCTGGA	rs62388076	chr5	+	174954915	A/T	44	taTCCGtGAGCTCtatATCTGTGaattcaaccaagtttggatggaaaattttttttt	psychotic
L1HS-360312_3	NM_022754	SFXN1	+	hsa-miR-28-3p	CACTAGATTGTGAGCTCCTGGA	rs71758691	chr5	+	174954919	-/T	48	taTCCGtGAGCTCtatATCTGTGaattcaaccaagtttggatggaaaattttttttt	psychotic
TA1-2808789-1_1	NM_022900	CASD1	+	hsa-miR-140-5p	CAGTGGTTTTACCCTATGGTAG	rs147320461	chr7	+	94139427	C/T	14	acaACCtGGGcAAgcgggagatcAACCACTacttcagcgtgaggagcgccaaggtgctg	intersect
L2-880562_1	NM_023934	FUNDC2	+	hsa-miR-339-5p	TCCCTGTCCTCCAGGAGCTCACG	rs200940771	chrX	+	154282917	C/T	15	aaCTGGGGGATttttcGGAggctttctgcttggcatggcatcctaag	intersect
L2-880562_1	NM_023934	FUNDC2	+	hsa-miR-339-5p	TCCCTGTCCTCCAGGAGCTCACG	rs142142951	chrX	+	154282944	C/G	42	aaCTGGGGGATttttcGGAggctttctgcttggcatggcatcctaag	intersect
0727AHS-1258036_1	NM_025205	MED28	+	hsa-miR-423-5p	TGAGGGGCAGAGAGCGAGACTTT	rs146001376	chr4	+	17626846	A/G	48	ttagtgctttgtaTCTgtCTCTCTGCCCCTCActaattctacacccatgagaattagacattattctccttaaatatata	intersect
TAON-3920846-1_1	NM_032810	ATAD1	-	hsa-miR-146b-5p	TGAGAACTGAATTCCATAGGCT	rs151207426	chr10	+	89514193	G/T	51	gttgaatccAGCCTgaacGTGGGtgcttgtGTTTgaccttttcagccatatattgtacagccttata	affective
L1HS-241576_4	NM_033240	PML	+	hsa-miR-423-3p	AGCTCGGTCTGAGGCCCCTCAGT	rs199516006	chr15	+	74315599	A/G	21	tgctacGCCTCGGACCagGAGgtgctggacatgcacggtttcctgcgccaggcgct	intersect
L2HS-515414_3	NM_052879	LARP4	+	hsa-miR-423-3p	AGCTCGGTCTGAGGCCCCTCAGT	rs185413087	chr12	+	50873141	A/G	31	tattccttCTGAGGGGCTTTtataaattattaactataatatatgat	psychotic
L2HS-1690182_1	NM_138338	POLR3H	-	hsa-miR-423-5p	TGAGGGGCAGAGAGCGAGACTTT	rs144117265	chr22	+	41922813	A/G	5	aatcacCTCagaccCTCTCTGCCTgCTCActgtgaggccccgtgtagccccctctctgagcttttggcct	intersect
0727AHS-1265061_1	NM_152230	IPMK	-	hsa-miR-339-5p	TCCCTGTCCTCCAGGAGCTCACG	rs183605875	chr10	+	59954660	C/T	41	aatTTCaTGGGGACAGGGGcagtgctacagttcctggaaaaatta	psychotic
0727AHS-1265061_1	NM_152230	IPMK	-	hsa-miR-339-5p	TCCCTGTCCTCCAGGAGCTCACG	rs188489836	chr10	+	59954678	A/C	23	aatTTCaTGGGGACAGGGGcagtgctacagttcctggaaaaatta	psychotic
L2HS-2731196_1	NM_152289	ZNF561	-	hsa-miR-423-3p	AGCTCGGTCTGAGGCCCCTCAGT	rs190917453	chr19	+	9719581	C/T	14	cctgtttatgtccaaatTTGGGGGGCCTgttCTGAGCacattttcctgtaagcactcaggaa	psychotic
L2HS-2061000_1	NM_172071	RC3H1	-	hsa-miR-423-5p	TGAGGGGCAGAGAGCGAGACTTT	rs150697445	chr1	+	173931137	A/G	25	GCTCCTCCCTacttggatcattatccaccctacctccaagaac	intersect
L1-846837_1	NM_176783	PSME1	+	hsa-miR-324-5p	CGCATCCCCTAGGGCATTGGTGT	rs14930	chr14	+	24608006	A/C	30	tcgagaaGCtCAAgaaGCCCAGGGGAgaaacaaagggaatgatctattgagagccc	psychotic
L1-846837_1	NM_176783	PSME1	+	hsa-miR-324-5p	CGCATCCCCTAGGGCATTGGTGT	rs1803829	chr14	+	24608030	C/T	54	tcgagaaGCtCAAgaaGCCCAGGGGAgaaacaaagggaatgatctattgagagccc	psychotic
L2HS-3355640_1	NM_178313	SPTBN1	+	hsa-miR-423-3p	AGCTCGGTCTGAGGCCCCTCAGT	rs185213402	chr2	+	54856168	C/T	23	agctggcgGCTGAGcgcaGGGCCcgtcTGGAaGAGTcccgccgcctctggaagttcttc	intersect
L2HS-2606064_1	NM_181891	UBE2D3	-	hsa-miR-423-5p	TGAGGGGCAGAGAGCGAGACTTT	rs142636099	chr4	+	103716126	C/T	34	TTGCccTCTTTGCCCCactccacccagtaatttgacattactagtgccatgta	affective
TA1-1325954-1_1	NM_182734	PLCB1	+	hsa-miR-423-5p	TGAGGGGCAGAGAGCGAGACTTT	rs142432676	chr20	+	8862292	A/G	1	aataccaagacaaattcaaaagaCTGCCCCTCGagattttggaattcgtgcaggaa	intersect
L1-815644_1	NM_199054	MKNK2	-	hsa-miR-423-5p	TGAGGGGCAGAGAGCGAGACTTT	rs141972242	chr19	+	2038019	C/T	47	cTGTggaCTGCCCCTTccaaagacccctggggggggtggggcattccgcc	psychotic
L1HS-717545_2	NM_201413	APP	-	hsa-miR-423-3p	AGCTCGGTCTGAGGCCCCTCAGT	rs200539466	chr21	+	27372453	C/T	23	aGAcGGGGCCgtGCCGAGCaatgatctcccgctggtactttgatgtgactgaagggaagtgt	psychotic
L1HS-717545_2	NM_201413	APP	-	hsa-miR-423-3p	AGCTCGGTCTGAGGCCCCTCAGT	rs202218688	chr21	+	27372446	C/T	30	aGAcGGGGCCgtGCCGAGCaatgatctcccgctggtactttgatgtgactgaagggaagtgt	psychotic
L1HS-717545_2	NM_201413	APP	-	hsa-miR-423-3p	AGCTCGGTCTGAGGCCCCTCAGT	rs201294669	chr21	+	27372466	C/G/T	10	aGAcGGGGCCgtGCCGAGCaatgatctcccgctggtactttgatgtgactgaagggaagtgt	psychotic
L2HS-703983_3	NM_207012	AP3M1	-	hsa-miR-423-5p	TGAGGGGCAGAGAGCGAGACTTT	rs71800245	chr10	+	75881756	-/TTC	19	ttgcTTTGCTTTCTGCTgaatccctaaTCTCAacaatctatacctggactgtccagttc	psychotic
L2HS-1096215_2	NR_049758	RPP14	+	hsa-miR-326	CCTCTGGGCCCTTCCTCCAG	rs10940	chr3	-	58305141	C/T	32	agttaagcacAGGGCCCAGcctgtcagcagtagctactattattgt	intersect

## Sheet: ST 10
Supplementary table X: top targeted genes
GENE	FUNCTION	Rôle in brain / psychiatric disorder	references	Differentialy expressed in brain
QKI	régulates pre-mRNA splicing, export of mRNAs from the nucleus, protein translation, and mRNA stability	involved in myelinization and oligodendrocyte differentiation. May play a role in schizophrenia.	10.1073/pnas.0601213103 10.1073/pnas.0601213103	T (DLPC)
LCOR	Transcriptional corepressor widely expressed in fetal and adult tissues	miRNA linked to this gene might play a role in treatment response in bipolar disorder. Comparative miRNA analysis between one patient with depression vs healthy control found an up-regulation of miRNA targetting LCOR	10.3389/fpsyt.2018.00207 10.1016/j.ejpsy.2017.10.002	T (DLPC)
NFAT5	This gene code for a nuclear factors of activated T cells family of transcription factors	Gene Ontology (GO) annotations related to this gene include DNA-binding transcription factor activity and DNA-binding transcription activator activity, RNA polymerase II-specific. It may have a role in brain	https://doi.org/10.1159/000493789	T (ACC & DLPC)
MBNL1	Code for a C3H-type zinc finger protein that modulates alternative splicing of pre-mRNAs.	No direct link with psychiatry found		T (DLPC)
NFIB	The protein it code enables DNA-binding transcription activator activity that is RNA-polymerase II-specific	Involved in brain development	https://doi.org/10.1016/j.ajhg.2018.10.006	T (DLPC)
CELF2	Code for a protein that regulated pre-mRNA splicing and lay be involved in mRNA editing, and translation.	Associated to neurological disorders but not with psychiatric disorders	10.1016/j.ajhg.2016.03.027	T (ACC & DLPC)
PTEN	PTEN is a multi-functional tumor suppressor that is commonly lost in human cancer.	May play a role in major depressive disorder	https://doi.org/10.1111/cns.14291
DYRK1A	This gene encodes a member of the Dual-specificity tyrosine phosphorylation-regulated kinase (DYRK) family. It may play a significant role in a signaling pathway regulating cell proliferation and may be involved in brain development.	Play a role in brain development	https://doi.org/10.3390/genes12111833 https://doi.org/10.1016/j.nbd.2012.01.007
TNRC6B	Code for a protein involved in regulation of gene expression	Variants of this gene increase the rist of major depressive disorder	https://doi.org/10.1038/s41380-022-01536-4	T (ACC & DLPC)
INO80D	This genes is involved in DNA recombination and DNA repair	No immediate link with psychiatry found		T (ACC & DLPC)
