# Supplementary figures and images for: Integrative analysis of miRNA expression profiles reveals distinct and common molecular mechanisms underlying broad diagnostic groups of severe mental disorders
Source: Springer Nature journal article supplement (doi:10.1038/s41380-025-03018-9), 2025-04-22

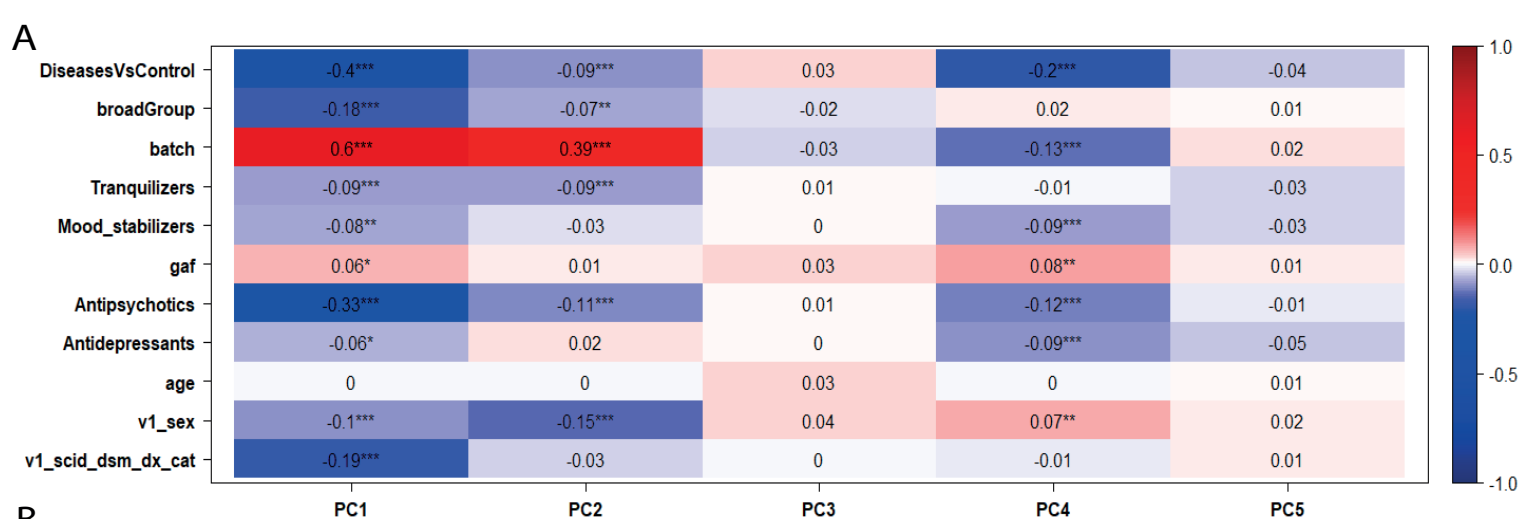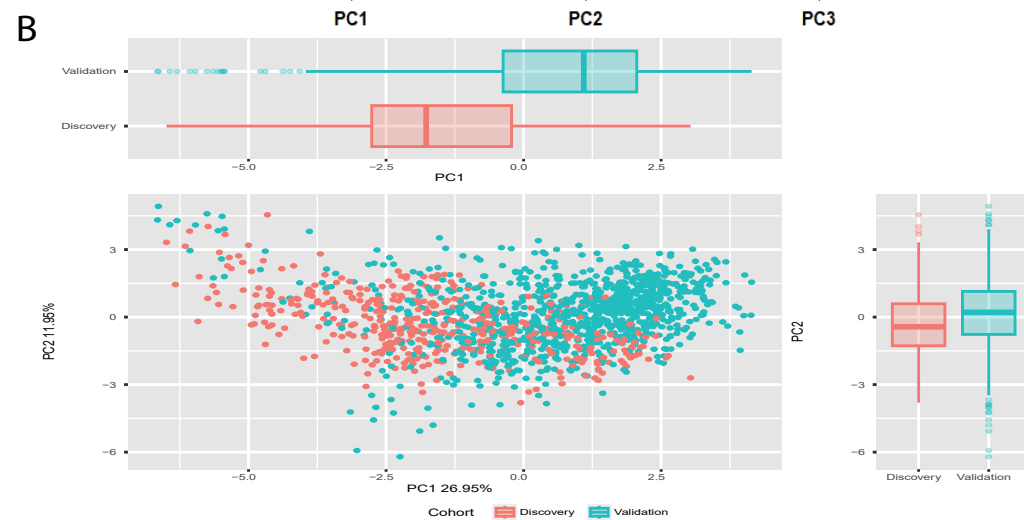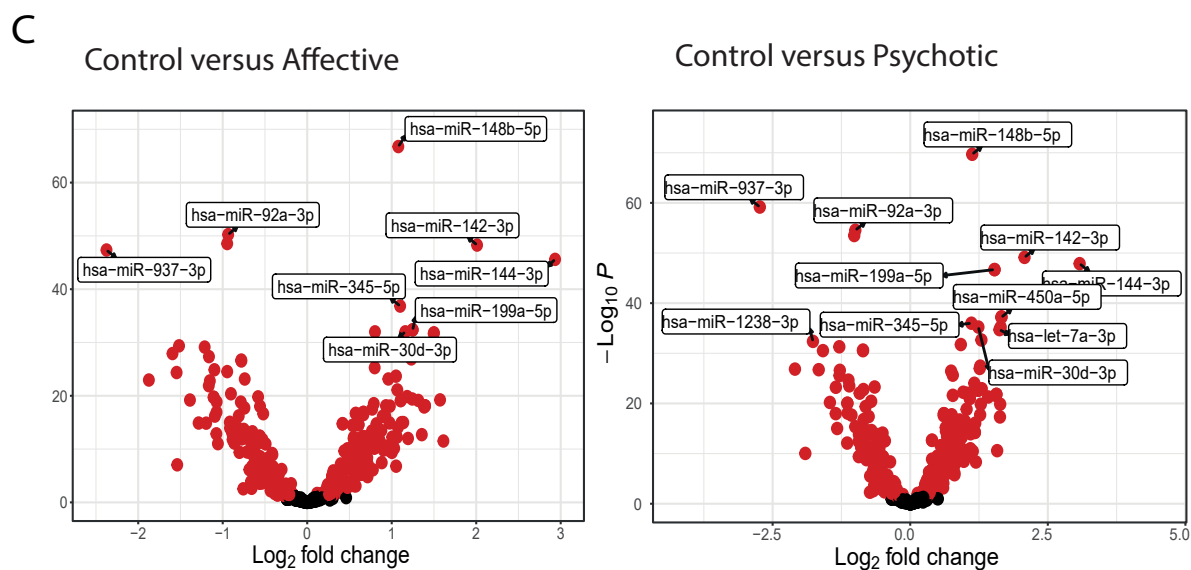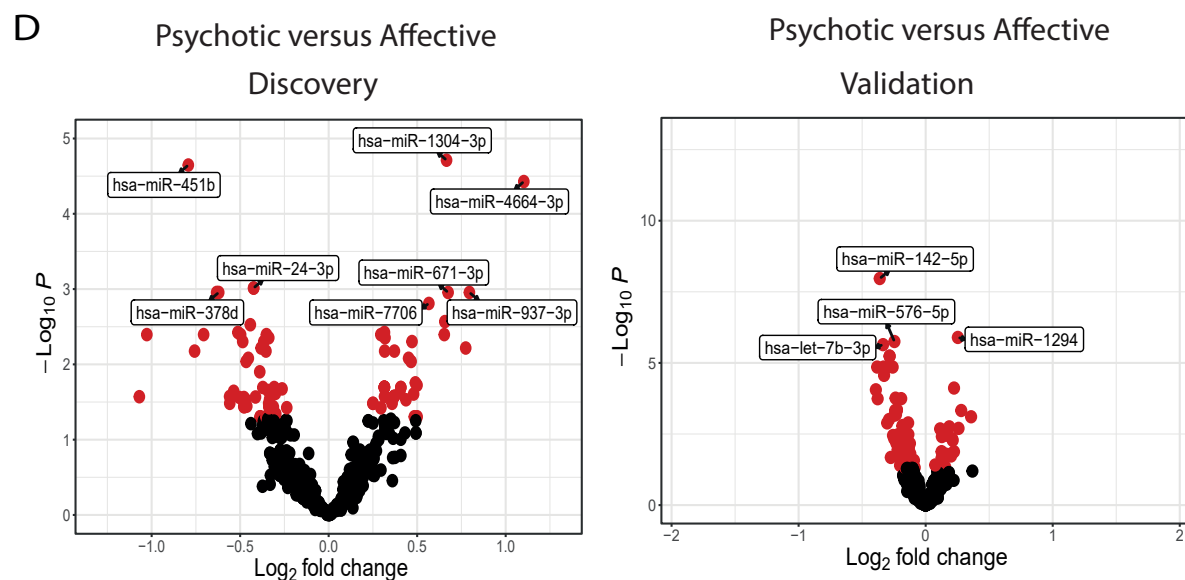

Supplement: MOESM2 [file 41380_2025_3018_MOESM2_ESM.pdf › 41380_2025_3018_MOESM2_ESM.pdf]

A

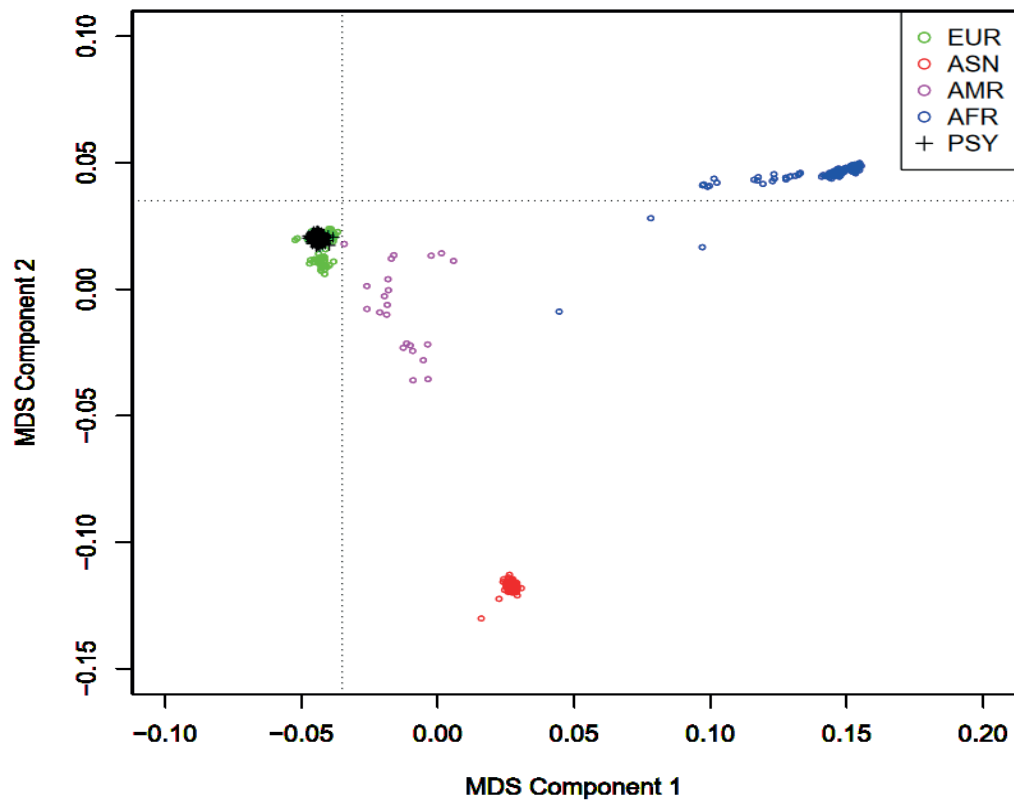

B

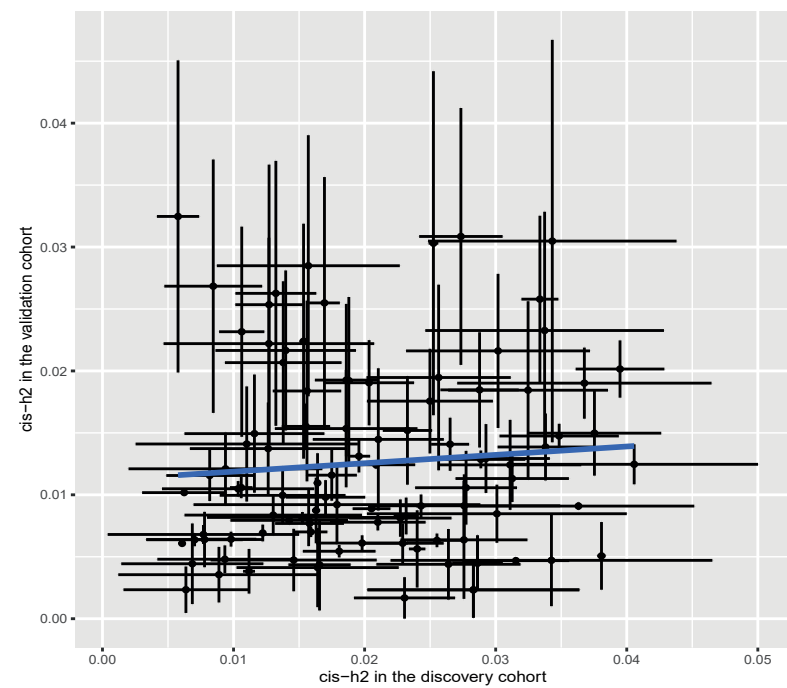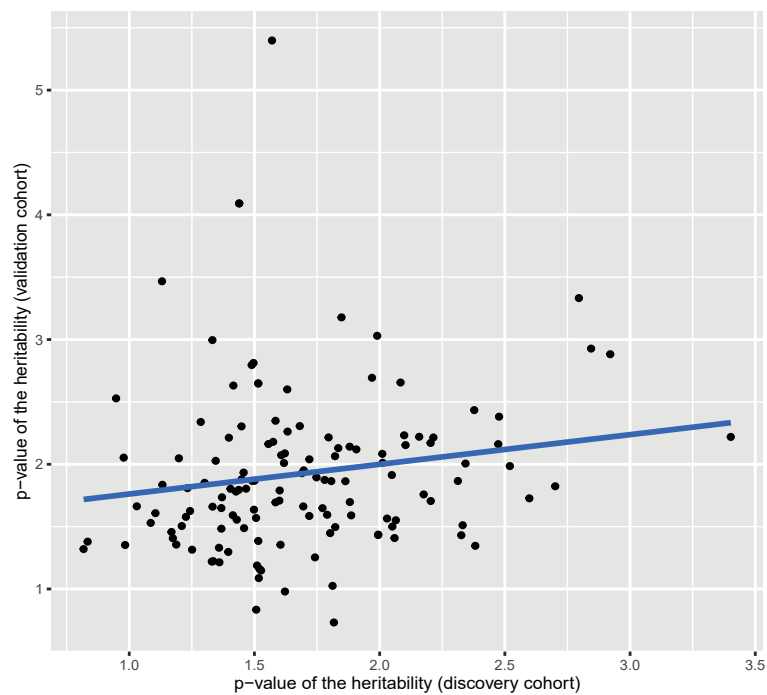

Supplement: MOESM3 [file 41380_2025_3018_MOESM3_ESM.pdf › 41380_2025_3018_MOESM3_ESM.pdf]

A

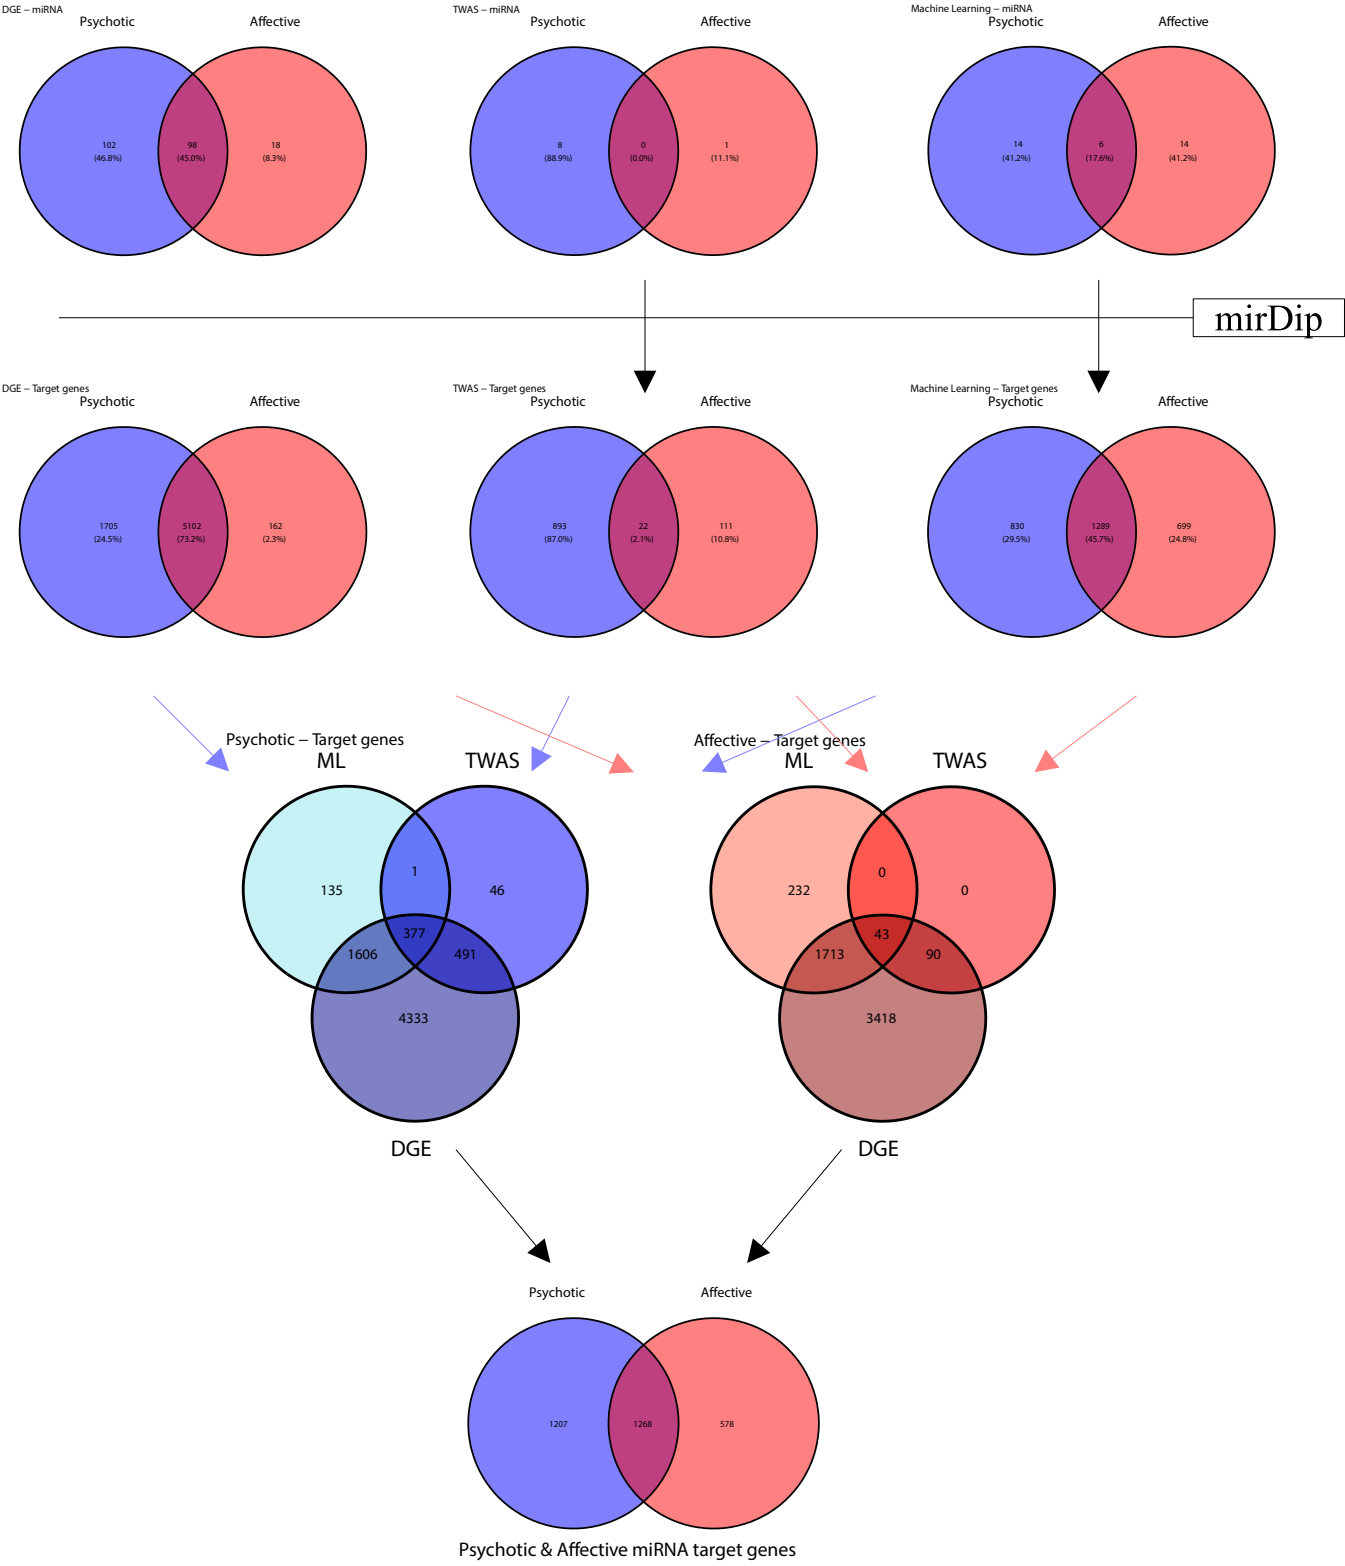

B

DLPC (miR-1908-5p)

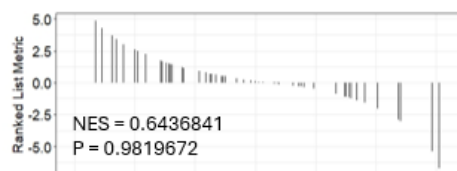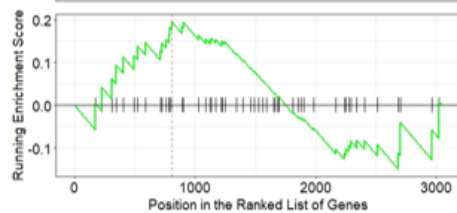

ACC (miR-1908-5p)

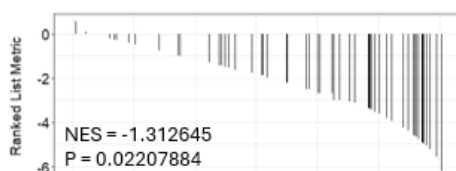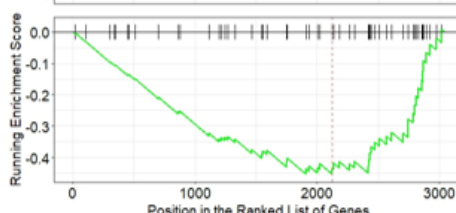

BLOOD (miR-1908-5p)

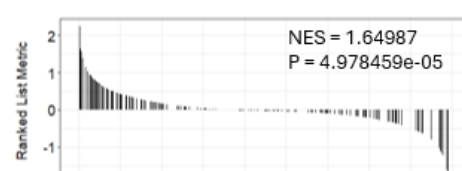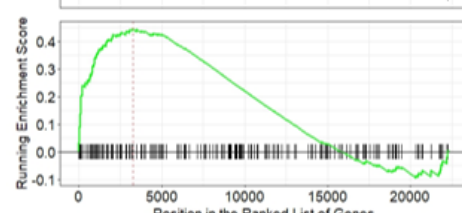

PSYCHOTIC GSEA

AFFECTIVE GSEA

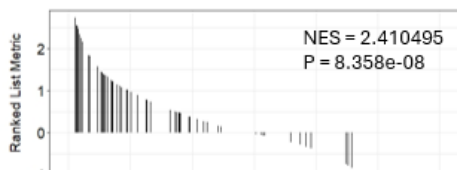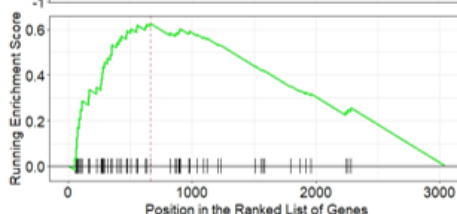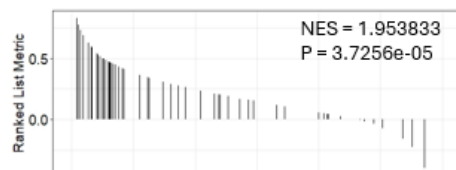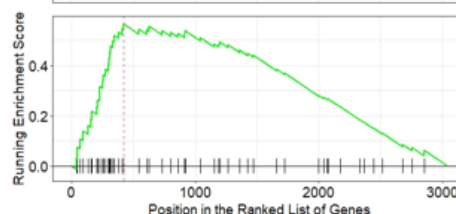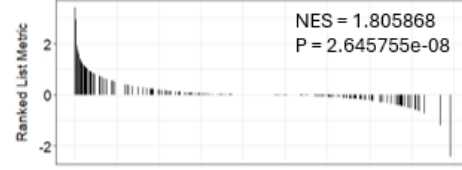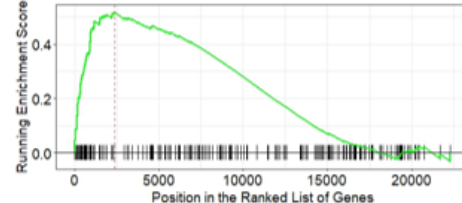

Supplement: MOESM5 [file 41380_2025_3018_MOESM5_ESM.pdf › 41380_2025_3018_MOESM5_ESM.pdf]
